# Supplementary material
Source: PubMed Central journal article supplement (PMC9832397)
Supplement: NIHMS1857404-supplement-Supplementary_Material.pdf [file NIHMS1857404-supplement-Supplementary_Material.pdf]

|                                                                                                                                       |           |
|---------------------------------------------------------------------------------------------------------------------------------------|-----------|
| <b>1. Materials.....</b>                                                                                                              | <b>4</b>  |
| <b>2. General molecular biology experiments .....</b>                                                                                 | <b>4</b>  |
| 2.1 Cloning .....                                                                                                                     | 4         |
| 2.2 Heterologous expression and purification of murine KS-MAT and variants .....                                                      | 5         |
| 2.3 Heterologous expression and purification of FAS ACP and DEBS ACP6.....                                                            | 5         |
| 2.4 Heterologous expression and purification of DEBS M6+TE, its variants and DEBS<br>KSC <sup>1661G</sup> -AT.....                    | 6         |
| 2.5 Protein concentration.....                                                                                                        | 6         |
| 2.6 Thermal shift assay.....                                                                                                          | 6         |
| 2.7 $\alpha$ -Ketoglutarate dehydrogenase coupled activity assay .....                                                                | 6         |
| 2.8 Analysis of AT-mediated transfer by global fitting .....                                                                          | 7         |
| 2.9 Specific ketoreductase activity .....                                                                                             | 7         |
| 2.10 NADPH consumption assays following reduced triketide lactone (TKL) and reduced<br>macrolactone production .....                  | 8         |
| 2.11 Chromatographic assay following non-reduced TKL production.....                                                                  | 8         |
| 2.12 HPLC-MS analysis of TKL and macrolactone products .....                                                                          | 9         |
| 2.13 HPLC-UV analysis and purification of macrolactone products .....                                                                 | 9         |
| 2.14 Enzymatic synthesis and analysis of compound 12 .....                                                                            | 9         |
| 2.15 Enzymatic synthesis and analysis of compound 15/16.....                                                                          | 10        |
| 2.16 Enzymatic synthesis and analysis of compound 18.....                                                                             | 10        |
| 2.17 Biotransformation of compound 18.....                                                                                            | 13        |
| <b>3. Substrate synthesis.....</b>                                                                                                    | <b>14</b> |
| 3.1 Chemicals .....                                                                                                                   | 14        |
| 3.2 Fluoromalonyl-CoA .....                                                                                                           | 14        |
| 3.3 Diketide SNAC (2) .....                                                                                                           | 15        |
| 3.4 Fluoromethylmalonyl-CoA (17).....                                                                                                 | 16        |
| <b>4. Supplementary Figures: .....</b>                                                                                                | <b>19</b> |
| Supplementary Fig. 1: Substrate specificity of ATs. ....                                                                              | 19        |
| Supplementary Fig. 2: Evolution of acyltransferase. ....                                                                              | 20        |
| Supplementary Fig. 3: Robustness of murine MAT fold.....                                                                              | 21        |
| Supplementary Fig. 4: Plasticity of the murine MAT domain. ....                                                                       | 22        |
| Supplementary Fig. 5: Quality control of precipitated F-Mal-CoA.....                                                                  | 23        |
| Supplementary Fig. 6: Further information on F-Mal-CoA.....                                                                           | 24        |
| Supplementary Fig. 7: Quality control of DEBS ACP6.....                                                                               | 25        |
| Supplementary Fig. 8: Global Michaelis-Menten fit of FAS MAT-mediated<br>transacylation of fluoromalonyl moieties to FAS ACP .....    | 26        |
| Supplementary Fig. 9: Global Michaelis-Menten fit of FAS MAT-mediated<br>transacylation of methylmalonyl moieties to DEBS ACP6.....   | 27        |
| Supplementary Fig. 10: Global Michaelis-Menten fit of DEBS AT6-mediated<br>transacylation of methylmalonyl moieties to DEBS ACP6..... | 28        |
| Supplementary Fig. 11: Design of DEBS/FAS hybrids.....                                                                                | 29        |

|                                                                                                                                                  |           |
|--------------------------------------------------------------------------------------------------------------------------------------------------|-----------|
| <b>Supplementary Fig. 12: Comparison of domain boundaries.....</b>                                                                               | <b>31</b> |
| <b>Supplementary Fig. 13: Purification and quality control of DEBS M6+TE and DEBS/FAS hybrids H1 and H2.....</b>                                 | <b>32</b> |
| <b>Supplementary Fig. 14: Proposed mechanism of polyketide formation.....</b>                                                                    | <b>34</b> |
| <b>Supplementary Fig. 15: Functionality of DEBS M6+TE.....</b>                                                                                   | <b>35</b> |
| <b>Supplementary Fig. 16: Biosynthesis of the pikromycin/methymycin precursor molecules.....</b>                                                 | <b>36</b> |
| <b>Supplementary Fig. 17: Extender substrate specificity of DEBS M6+TE (WT).....</b>                                                             | <b>37</b> |
| <b>Supplementary Fig. 18: Chemical structures of erythromycin and derivatives.....</b>                                                           | <b>38</b> |
| <b>Supplementary Fig. 19: Global Michaelis-Menten fit of FAS MAT-mediated transacylation of fluoromethylmalonyl-CoA moieties to FAS ACP.....</b> | <b>39</b> |
| <b>Supplementary Fig. 20: Possible mechanisms for the KS-catalyzed Claisen condensation.....</b>                                                 | <b>40</b> |
| <b>Supplementary Fig. 21: Postulated mechanism for the production of S7.....</b>                                                                 | <b>41</b> |
| <b>Supplementary Fig. 22: Design of TE exchange .....</b>                                                                                        | <b>42</b> |
| <b>Supplementary Fig. 23: Biotransformation of compound 18.....</b>                                                                              | <b>43</b> |
| <b>Supplementary Fig. 24: Conversion of hexaketide 21 to compounds 22-23.....</b>                                                                | <b>44</b> |
| <b>5. Supplementary Tables:.....</b>                                                                                                             | <b>45</b> |
| <b>Supplementary Table 1: Absolute kinetic parameters for MAT- and DEBS AT6-mediated transfer.....</b>                                           | <b>45</b> |
| <b>Supplementary Table 2: Table of compounds.....</b>                                                                                            | <b>46</b> |
| <b>Supplementary Table 3: Overview about substrates and constructs used in this study.....</b>                                                   | <b>47</b> |
| <b>Supplementary Table 4: Used plasmids .....</b>                                                                                                | <b>48</b> |
| <b>Supplementary Table 5: Primers.....</b>                                                                                                       | <b>51</b> |
| <b>Supplementary Table 6: DNA Sequences .....</b>                                                                                                | <b>54</b> |
| <b>6.1 Supplementary note: Stereochemistry of 18 .....</b>                                                                                       | <b>60</b> |
| <b>Supplementary Note Fig. 1: 2D and 3D structure of all possible stereoisomers, created by chemdraw and Avogadro.....</b>                       | <b>61</b> |
| <b>Supplementary Note Fig. 2: <sup>1</sup>H-NMR analysis of the product and assignment of the peaks.....</b>                                     | <b>62</b> |
| <b>Supplementary Note Fig. 3: Selected view of the NOESY experiment with compound 18.....</b>                                                    | <b>63</b> |
| <b>Supplementary Note Fig. 4: Selected view of the NOESY experiment with compound 18.....</b>                                                    | <b>64</b> |

|                                                                                                                                                                                     |           |
|-------------------------------------------------------------------------------------------------------------------------------------------------------------------------------------|-----------|
| <b>Supplementary Note Table 1: HCCH dihedral angles (<math>\Phi</math>) between C3 and C4 and experimental and calculated <math>^3J_{\text{HH}}</math> coupling constants. ....</b> | <b>65</b> |
| <b>Supplementary Note Table 2: HCCF dihedral angles (<math>\Phi</math>) between C2 and C3 and experimental and calculated <math>^3J_{\text{HF}}</math> coupling constants.....</b>  | <b>66</b> |
| <b>6.2 Supplementary note: Stereochemistry of elongation substrates.....</b>                                                                                                        | <b>67</b> |
| <b>6.3 Supplementary note: Stereochemistry of TKLs and macrolactones.....</b>                                                                                                       | <b>67</b> |
| <b>7. Spectra.....</b>                                                                                                                                                              | <b>69</b> |
| <b>8. References .....</b>                                                                                                                                                          | <b>88</b> |

## 1. Materials

All CoA-esters (except F-Mal-CoA),  $\beta$ -NAD<sup>+</sup>, NADH,  $\alpha$ -ketoglutarate dehydrogenase (porcine heart) ( $\alpha$ KGDH),  $\alpha$ -ketoglutaric acid, thiamine pyrophosphate (TPP), and EDTA were purchased from Merck. BSA was from Serva. Restriction enzymes were bought from NEB biolabs. IPTG was from Carl Roth. Ni-NTA affinity resin was from Qiagen and 5 mL Strep-Tactin® columns were purchased from IBA technologies. Purity of CoA-esters was confirmed by HPLC-UV analysis before use.

Plasmid encoding DEBS M6+TE (pBL18) was kindly provided by the Khosla laboratory at Stanford University and the plasmid encoding the 4'-phosphopantetheinyl transferase Npt (UniProt code: A0A1Y2MXW0) was kindly provided by the Erb laboratory at the Max-Planck-Institute for terrestrial Microbiology, Marburg.

## 2. General molecular biology experiments

### 2.1 Cloning

Variations in the MAT domain were introduced by PCR based cloning. The template vector pAR70<sup>1</sup> was amplified with primer pairs, listed in Supplementary Table 5. PCR products were treated with Dpn1 (NEB), purified by gel electrophoresis and DNA was extracted with the Wizard® SV Gel and PCR Clean-Up System (Promega). Purified DNA was transformed into *E. coli* Stellar™ Competent Cells, 5 mL LB cultures were grown and plasmids were isolated with the PureYield™ Plasmid Miniprep System (Promega) or the GeneJET Plasmid Miniprep Kit (Thermo Scientific). Sequences of all plasmids, listed in Supplementary Table 4, were confirmed with the “dye terminator” method.

Vectors encoding hybrid DEBS/FAS proteins (pMJD076 (**H2**) and pMJD077 (**H1**)) were produced by sequence and ligation independent cloning using the In-Fusion HD Cloning Kit (Takara Bio, USA). Briefly, pBL18 was amplified with primers: MJD101 and MJD102 or primers: MJD105 and MJD106. The corresponding inserts were generated by amplification of pAR264<sup>1</sup> with primers: MJD087 and MJD088 or primers: MJD091 and MJD092. PCR products were treated with Dpn1 (NEB), purified by gel electrophoresis and DNA was extracted with the Wizard® SV Gel and PCR Clean-Up System (Promega). Purified vector and insert DNA were combined in the In-Fusion reaction following the manufacturer’s instructions. DNA was transformed into *E. coli* Stellar™ Competent Cells, 5 mL LB cultures were grown and plasmids were isolated with the PureYield™ Plasmid Miniprep System (Promega) or the GeneJET Plasmid Miniprep Kit (Thermo Scientific). Sequences of all plasmids, listed in Supplementary Table 4, were confirmed with the “dye terminator” method.

Vectors pAR432, pMJD091 and pMJD094 were also generated by sequence and ligation independent cloning using the In-Fusion HD Cloning Kit. For pAR432, the two fragments were obtained by amplification of pBL18 with primers: AR719 and AR722 or primers: AR721 and AR720. For pMJD091, the insert was generated by amplification of pET21a\_Sppt with primers: MJD138 and MJD139 and the vector by amplification of pAR357 with primers: MJD136 and MJD137. For pMJD094, the insert was generated by amplification of pBL18 with primers: MJD145 and MJD146 and the linearized vector by digestion of pET-28a (Merck Millipore) with enzymes NdeI and EcoRI resembling the design of Kim *et al.* <sup>2</sup>.

Vector pMSR001 (**H1.1**) was also generated by sequence and ligation independent cloning using the In-Fusion HD Cloning Kit, resembling the design of Koch *et al.* <sup>3</sup>. To generate pMSR001

**(H1.1)**, pMJD077 (**H1**) was amplified with primers: PRMJD164 and PRMJD175 and the insert was generated by amplification of *Streptomyces venezuelae* (*Streptomyces* sp., DSM 41110/ATCC 15439, purchased from DSMZ) genomic DNA with the primers: PRMJD177 and PRMJD178.

## 2.2 Heterologous expression and purification of murine KS-MAT and variants

All plasmids were transformed into chemically competent *E. coli* BL21 Gold (DE3) cells. Transformed cells were grown overnight at 37 °C in 20 mL LB (100 µg mL<sup>-1</sup> ampicillin (amp) and 1 % (w/v) glucose) medium. Pre-cultures were used to inoculate 1 L TB medium (100 µg mL<sup>-1</sup> amp). Cultures were grown at 37 °C until they reached an optical density (OD<sub>600</sub>) of 0.5-0.6. After cooling at 4 °C for 20 min, cultures were induced with 0.25 mM IPTG, and grown for additional 16 h at 20 °C and 180 rpm. Cells were harvested by centrifugation (4,000 rcf for 20 min). The cell pellets were resuspended in lysis buffer (50 mM potassium phosphate, 200 mM potassium chloride, 10 % (v/v) glycerol, 1 mM EDTA, 30 mM imidazole (pH 7.0)) and lysed by French press. After centrifugation at 50,000 rcf for 30 min, the supernatant was mixed with 1 M MgCl<sub>2</sub> to a final concentration of 2 mM. The cytosol was transferred to Ni-NTA-columns and washed with 5 column volumes (CV) wash buffer (lysis buffer without EDTA). Bound protein was eluted with 2.5 CV elution buffer (50 mM potassium phosphate, 200 mM potassium chloride, 10 % (v/v) glycerol, 300 mM imidazole (pH 7.0)). The eluent was transferred to Strep-Tactin-columns, and washed with 5 CV strep-wash buffer (250 mM potassium phosphate, 10 % (v/v) glycerol, 1 mM EDTA, (pH 7.0)). Proteins were eluted with 2.5 CV elution buffer (strep-wash buffer containing 2.5 mM D-desthiobiotin). After concentration to 10-20 mg mL<sup>-1</sup>, the proteins were frozen in liquid nitrogen and stored at -80 °C. Samples were thawed at 37 °C for 30 min and further polished by size-exclusion chromatography (SEC) using a Superdex 200 GL10/300 column equilibrated with the strep-wash buffer. Fractions containing dimeric protein were pooled and concentrated to 10-20 mg mL<sup>-1</sup> to be frozen in liquid nitrogen and stored in aliquots at -80 °C.

## 2.3 Heterologous expression and purification of FAS ACP and DEBS ACP6

FAS ACP for the activity assay was produced by co-expressing FAS ACP with Sfp from *Bacillus subtilis* bicistronically (pAR352) in *E. coli* BL21gold(DE3) cells<sup>1</sup>. Overnight cultures were grown in LB (100 µg/mL ampicillin and 1 % glucose) at 37 °C. 2 L TB medium (100 µg/mL amp) was inoculated and incubated at 37 °C until an optical cell density (OD<sub>600</sub>) of 0.5-0.6 was reached. After cooling at 4 °C for 20 min, cultures were induced with 0.25 mM IPTG and cells were grown for 16 h at 20 °C. Cells were harvested by centrifugation, resuspended in lysis buffer (50 mM sodium phosphate, 200 mM NaCl, 20 % (v/v) glycerol, 1 mM EDTA, 30 mM imidazole (pH 7.4) and lysed by French press. After centrifugation (50,000 rcf for 30 min), the supernatant (supplemented with 2 mM MgCl<sub>2</sub>) was transferred to Ni-NTA-columns and washed with 5 CV wash buffer (lysis buffer without EDTA). The protein was eluted with 2.5 CV elution buffer (wash buffer containing 300 mM imidazole) and concentrated. Pooled fractions, were separated on a Superdex 200 HiLoad 16/60 or 26/60 SEC column equilibrated with buffer (50 mM sodium phosphate, 200 mM NaCl, 10 % (v/v) glycerol, 1 mM EDTA, 1 mM DTT). All fractions containing monomeric ACP were pooled and concentrated to 10-20 mg mL<sup>-1</sup> (common yield was 20 mg purified protein per 1 L culture).

DEBS ACP6 was produced by co-expressing DEBS ACP6 (pMJD094) with Sfp from *Bacillus subtilis* (pAR357) or with 4'-phosphopantetheinyl transferase Npt from *Streptomyces platensis* (pMJD091) in *E. coli* BL21gold(DE3) cells. Expression and purification was performed

with the FAS ACP protocol, except that kanamycin (50  $\mu\text{g}/\text{mL}$  kan) and spectinomycin (50  $\mu\text{g}/\text{mL}$  spc) were used as antibiotics for cultivation. Phosphopantetheinylation of DEBS ACP6 was investigated by electrospray ionization (ESI) mass spectrometry (Supplementary Fig. 7), which showed that only co-expression with Npt yielded sufficiently activated protein. All assays were performed with this protein.

#### 2.4 Heterologous expression and purification of DEBS M6+TE, its variants and DEBS KS<sup>C1661G</sup>-AT

DEBS M6+TE and all its variant were produced by co-expression of DEBS M6+TE (pBL18, pMJD076, pMJD077) with Sfp from *Bacillus subtilis* (pAR357) in *E. coli* BL21gold(DE3) cells. Expression and purification was performed with the FAS ACP protocol, except that ampicillin (100  $\mu\text{g}/\text{mL}$  amp) and spectinomycin (50  $\mu\text{g}/\text{mL}$  spc) were used as antibiotics for cultivation. Further, the protein was purified in a different lysis buffer (50 mM sodium phosphate, 450 mM NaCl, 20 % (v/v) glycerol, 1 mM EDTA, 20 mM imidazole (pH 7.6)). The protein on the Ni-NTA column was washed with 5 CV washing buffer 1 (50 mM sodium phosphate, 450 mM NaCl, 20 % (v/v) glycerol, 20 mM imidazole (pH 7.6)) and 2 CV washing buffer 2 (50 mM sodium phosphate, 450 mM NaCl, 20 % (v/v) glycerol, 1 mM EDTA, 60 mM imidazole (pH 7.6)). The proteins were eluted with 2.5 CV elution buffer (50 mM sodium phosphate, 450 mM NaCl, 20 % (v/v) glycerol, 300 mM imidazole (pH 7.6)) and further polished and analyzed by size-exclusion chromatography (SEC) using a Superdex 200 Increase 10/300 GL, HiLoad 16/600 Superdex 200 or Superose 6 Increase 10/300 GL column equilibrated with the washing buffer 1. Fractions containing dimeric protein were pooled and concentrated to 1-10  $\text{mg mL}^{-1}$  to be frozen in liquid nitrogen and stored in aliquots at  $-80\text{ }^\circ\text{C}$ .

DEBS KS<sup>C1661G</sup>-AT (pAR432) was expressed without Sfp in *E. coli* BL21gold(DE3) cells and purified following the protocol for the whole DEBS module 6.

#### 2.5 Protein concentration

Protein concentrations were calculated from the absorbance at 280 nm, which was recorded on a NanoDrop 2000c (Thermo Scientific). Extinction coefficients were calculated from the primary sequence without *N*-formylmethionine with CLC Main workbench (Qiagen). Absorbance 1 g/L at 280 nm (10 mm): 1.053 for FAS KS-MAT; 0.475 for FAS ACP, 1.009 for DEBS M6+TE (WT), 0.474 for DEBS ACP6, 0.899 for DEBS KS6-AT6, 1.087 for **H1**, 1.069 for **H2** and 1.031 for **H1.1**.

#### 2.6 Thermal shift assay

Thermal shift assays were performed as previously reported<sup>4</sup>. Briefly, 2  $\mu\text{L}$  of protein solution (5-6  $\mu\text{M}$ ) were mixed with 21  $\mu\text{L}$  of the respective buffer and 2  $\mu\text{L}$  of SYPRO Orange protein gel stain (80  $\times$  diluted), then fluorescence was measured from 5  $^\circ\text{C}$  to 95  $^\circ\text{C}$  with a step gradient of 0.5  $^\circ\text{C min}^{-1}$ , with excitation wavelength set to 450-490 nm, and emission wavelength to 560-580 nm. Data was analyzed with the software CFX Maestro 1.0.

#### 2.7 $\alpha$ -Ketoglutarate dehydrogenase coupled activity assay

The enzyme-coupled assay was performed as previously published<sup>1</sup>. Assays were run in 384-well Small Volume HiBase Microplates (Greiner Bio-one) with following settings for the microplate reader (ClarioStar, BMG labtech): 348-20 nm; emission: 476-20 nm; gain: 1500; focal height: 11.9 mm; flashes: 17; orbital averaging: off.

Briefly, four different solutions were prepared as 4-fold concentrated stocks in assay buffer (50 mM sodium phosphate, 10 % (v/v) glycerol, 1 mM EDTA (pH 7.6), filtered and degased). Solution 1 (Sol 1) contained the acyltransferase, supplemented with 0.1 mg mL<sup>-1</sup> BSA. Solution 2 (Sol 2) contained 8 mM  $\alpha$ -ketoglutaric acid, 1.6 mM NAD<sup>+</sup>, 1.6 mM TPP and 60 mU/100  $\mu$ L  $\alpha$ KGDH. Solution 3 (Sol 3) contained the CoA-esters and Solution 4 (Sol 4) finally contained the respective ACP as standalone protein. The components (5  $\mu$ L) were pipetted in order: Sol 1, Sol 2 and Sol 3, followed by manual mixing. The transfer reaction was initiated by injection of 5  $\mu$ L Sol 4 with the dispenser. The final concentrations of all ingredients were 50 mM sodium phosphate, pH 7.6, 10 % (v/v) glycerol, 1 mM EDTA, 2 mM  $\alpha$ -ketoglutaric acid, 0.4 mM NAD<sup>+</sup>, 0.4 mM TPP, 15 mU/100  $\mu$ L  $\alpha$ KGDH, 0.03 mg mL<sup>-1</sup> BSA, 1-5 nM FAS MAT or 250 nM DEBS AT6, 10-400  $\mu$ M ACP, 0.1-25  $\mu$ M X-CoA for FAS MAT and 2-130  $\mu$ M for DEBS AT6 (where X refers to the respective acyl-moiety of the assay). Equidistant kinetic measurements were taken every 5 s for 5 min at 25 °C. Every data point was recorded in technical triplicates and the respective background noise of the assay set-up (assay buffer supplemented with 0.1 mg mL<sup>-1</sup> BSA) was subtracted. The enzyme-mediated hydrolysis rate was not subtracted, as it is relatively low compared to transfer rates.

### 2.8 Analysis of AT-mediated transfer by global fitting

For every global fit, initial velocities were determined for eight different CoA-ester concentrations at four fixed ACP concentrations. Every data point reflects the result from one biological replicate and measurements were performed in at least two biological replicates ( $n \geq 2$ ). Relative fluorescent units were converted into concentrations using a NADH calibration curve. Series of response curves were globally fit using all data without any parameter constraints. The global fit was performed with OriginPro 8.5 (OriginLab, USA) using the following equations for the ping-pong mechanism:

$$v = \frac{k_{\text{cat}}[\text{AT}_0][\text{XCoA}][\text{ACP}]}{[\text{XCoA}]K_{\text{ACP}} + [\text{ACP}]K_{\text{S}} + [\text{XCoA}][\text{ACP}]} \quad [1]$$

### 2.9 Specific ketoreductase activity

The specific ketoreductase activity of DEBS KR6 was measured fluorometrically by monitoring the consumption of NADPH at 25 °C according to previous reports<sup>5</sup>. Assays were performed in 384-well Small Volume HiBase Microplates (Greiner Bio-one) with following settings for the microplate reader (ClarioStar, BMG labtech): 348-20 nm; emission: 476-20 nm; gain: 1301; focal height: 12.4 mm; flashes: 17; orbital averaging: off. Two solutions were prepared as 4-fold concentrated stocks and *trans*-1-decalone was prepared as 2-fold concentrated stock, in the assay buffer (400 mM phosphate buffer, 20 % (v/v) glycerol, 2 mM DTT, 1 mM EDTA, 0.8 % DMSO (pH 7.2))<sup>6</sup>. Solution 1, 2 and 3 contained the variants of DEBS M6+TE (1.2  $\mu$ M), the NADPH (240  $\mu$ M) and the *trans*-1-decalone (4 mM in assay buffer), respectively. 5  $\mu$ L of enzyme and NADPH solution were mixed with 10  $\mu$ L of *trans*-1-decalone solution (all incubated at 25 °C) to final concentrations of 0.3  $\mu$ M enzyme, 60  $\mu$ M NADPH and 2 mM *trans*-1-decalone. The consumption was monitored fluorometrically for 3 min and converted to concentrations using a NADPH calibration curve. Each of the biological triplicates was measured in technical replicates and the slope was corrected by the background noise of the assay set up (NADPH and *trans*-1-decalone in the respective concentrations without enzyme).

#### 2.10 NADPH consumption assays following reduced triketide lactone (TKL) and reduced macrolactone production

The production rate of reduced TKLs and macrolactones were monitored fluorometrically by observing the consumption of NADPH. Assays were performed in 384-well Small Volume HiBase Microplates (Greiner Bio-one) with following settings for the microplate reader (ClarioStar, BMG labtech): 348-20 nm; emission: 476-20 nm; gain: 1301; focal height: 12.4 mm; flashes: 17; orbital averaging: off. Four solutions were prepared as 4-fold concentrated stocks and the X-CoA and NADPH solutions were combined to yield a 2-fold concentrated stock, in the assay buffer (400 mM phosphate buffer, 20 % (v/v) glycerol, 1 mM EDTA, 0.8 % DMSO (pH 7.2)). Solution 1, 2 and 3 contained the variants of DEBS M6+TE (16  $\mu$ M), the diketide SNAC **2** (20 mM) or pentaketide **9** (4 mM) or hexaketide **21** (4 mM), MM-CoA or Mal-CoA or F-Mal-CoA or F-MM-CoA (400  $\mu$ M) and the NADPH (120  $\mu$ M), respectively. 5  $\mu$ L of priming substrates and enzyme solutions were mixed with 10  $\mu$ L of the X-CoA, NADPH stock (all incubated at 25 °C) to final concentrations of 4  $\mu$ M enzyme, 5 mM **2** or 1 mM **9** or 1 mM **21**, 200  $\mu$ M X-CoA and 60  $\mu$ M NADPH. The fluorescence was monitored for 13-20 min and converted into concentrations by using a NADPH calibration curve. Each of the biological triplicates was measured in technical replicates and the slope was corrected by the background noise of the assay set up (NADPH, X-CoA and **2** without enzyme for TKL production and NADPH, **9** or **21** and enzyme without elongation substrate for macrolactones).

The NBOM protected hexaketide substrate was deprotected as described by Hansen *et al.*<sup>7</sup>. Briefly, 25 mM ascorbic acid, 4 mM sodium metabisulfite and 4 mM NBOM protected hexaketide were dissolved in water and irradiated for 20 min (254 nm and 365 nm switched on) to yield deprotected hexaketide **21**.

#### 2.11 Chromatographic assay following non-reduced TKL production

Alternatively, we measured the production rates for non-reduced TKLs in the absence of NADPH by quantifying the consumption of CoA-ester substrates and liberation of CoA with HPLC-UV. The four stock solutions were prepared as described in the previous section in the assay buffer (400 mM phosphate buffer, 20 % (v/v) glycerol, 1 mM EDTA, 0.8 % DMSO (pH 7.2)). 80  $\mu$ L of all solutions were mixed and incubated at 25 °C for 60 min. After 0, 5, 10, 15, 20, 30 and 60 min, 40  $\mu$ L samples were taken and the reactions were stopped by the addition of 5  $\mu$ L perchloric acid (70 %). Reaction mixtures were mixed thoroughly and subsequently neutralized with 5  $\mu$ L NaOH (10 M). Hydroxybutyryl-CoA (final concentration: 50  $\mu$ M) was added as an internal standard. Reaction mixtures were spun at 20000 ref for 10 min. 30  $\mu$ L of the supernatant was transferred into HPLC vials and measured by HPLC-UV.

HPLC-UV analysis of CoA esters was performed using a Dionex UltiMate 3000 RSLC with a UV detector. Chromatographic separation was performed on a Synchronis aQ-c18 column (4.6  $\times$  250 mm, particle size 5  $\mu$ m, ThermoFisher Scientific) with a mobile-phase system consisting of buffer A (0.2 M ammonium acetate (pH 6.0)) and buffer B (methanol). The column was equilibrated with 95 % buffer A and 5 % buffer B at a flow rate of 0.8 mL/min. X-CoA was purified using a linear gradient from 5 to 20 % B over 15 min and an increased gradient from 20 to 60 % B over 8 min (The column was regenerated 3 min at 60 % B and re-equilibrated again for the next sample). Absorbance of X-CoA was monitored at 260 nm and assigned by the elution time of purchased CoA ester references. Peak areas were correlated to the internal standard peak and converted into concentrations. Concentrations were plotted versus the time and fit with an exponential decay function in OriginPro 8.5 (OriginLab, USA). Initial velocities were obtained



from the deviation of the function and its slope at 0 min. Background measurements were performed in the absence of diketide SNAC **2**.

$$y = y_0 + A_1 e^{-x/t_1} \quad [2]$$

#### 2.12 HPLC-MS analysis of TKL and macrolactone products

All reaction mixtures were prepared as described in 2.10. Unreduced compounds were prepared with the same conditions but without NADPH. After overnight incubation, the reaction mixtures were extracted using EtOAc (2 times 400  $\mu$ L for TKLs, 3 times 300  $\mu$ L for macrolactones). Combined organic phases were evaporated in a SpeedVac *in vacuo*. Samples were dissolved in 50  $\mu$ L methanol and spun at 20000 rcf for 20 min. 40  $\mu$ L of the supernatant was transferred into HPLC vials and measured by HPLC-MS using the Ultimate 3000 LC (Dionex) system connected to a Acquity UPLC BEH C18 (2.1  $\times$  50 mm, particle size 1.7  $\mu$ m, Waters) for separation. After equilibration with 5 % acetonitrile in water, samples were purified using a linear gradient from 5-95 % within 16 min and subsequently injected into the AmaZonX (Bruker) or Impact II qToF (Bruker) for ESI.

#### 2.13 HPLC-UV analysis and purification of macrolactone products

HPLC-UV analysis of macrolactones was performed using a Dionex UltiMate 3000 RS UHPLC with a RS Diode Array UV detector. Chromatographic separation was performed on a Synchronis aQ-c18 column (4.6  $\times$  250 mm, particle size 5  $\mu$ m, ThermoFisher Scientific) with a mobile-phase system consisting of buffer A (water) and buffer B (acetonitrile). The column was equilibrated with 95 % buffer A and 5 % buffer B at a flow rate of 0.8 mL/min. Macrolactones were purified using a linear gradient from 5 to 95 % B over 15 min and another 5 min at 95 % B. A linear gradient to 5 % B was used within 1 min and the column was re-equilibrated for five more minutes at 5 % B. Fractionation was performed with the UltiMate 3000 Autosampler in between 3 and 16 min in 20 s steps.

#### 2.14 Enzymatic synthesis and analysis of compound **12**

In order to conduct NMR analysis of compound **12**, the reaction volume was scaled up to 10 mL and a purification strategy was established. Final concentrations of 300  $\mu$ M pentaketide substrate **9** (1.05 mg, dissolved in DMSO), 400  $\mu$ M Mal-CoA and 500  $\mu$ M NADPH were dissolved in assay buffer (250 mM potassium phosphate, 10 % glycerol, pH 7) and 5  $\mu$ M **H1** (9.16 mg, dissolved in 250 mM potassium phosphate, 10 % glycerol, pH 7) was added to a final volume of 10 mL. The reaction mixture (slightly cloudy emulsion) was incubated for 16 h at 25  $^{\circ}$ C and the progress of the reaction was monitored by HPLC (samples were prepared by quenching 20  $\mu$ L mixture with 60  $\mu$ L methanol). The reaction mixture was transferred to a 50 mL falcon tube and the aqueous phase was extracted with EtOAc (5  $\times$  10 mL) by spinning for 1 min at 3000 rcf to separate the phases. The combined organic phases were transferred to a 250 mL round bottom glass flask, the solvent was evaporated *in vacuo* and the residual oil was dried by azeotropic evaporation with toluene (2  $\times$  1 mL). After running a TLC (hexane/EtOAc 1:1 stained with KMnO<sub>4</sub>-solution), the crude product was adsorbed to silica gel and purified by flash chromatography (silica column: 1.3 cm diameter and 15 cm height). A gradient was used for elution (hexane:EtOAc 20:1  $\rightarrow$  10:1  $\rightarrow$  7:1  $\rightarrow$  5:1  $\rightarrow$  3:1  $\rightarrow$  2:1  $\rightarrow$  1:1) and every fraction was carefully analyzed by TLC. All fractions containing the product were pooled, filtered and the solvent was evaporated *in vacuo* to yield compound **12** as white solid.

**R<sub>F</sub>-value** (TLC; hexane/EtOAc: 1/1): 0.44

**Retention time** (HPLC; water/ACN): 13.74 min

**<sup>1</sup>H NMR** (600 MHz, Chloroform-*d*) δ 6.76 (dd, *J* = 15.7, 5.4 Hz, 1H), 6.44 (dd, *J* = 15.8, 1.2 Hz, 1H), 5.02 (ddd, *J* = 8.3, 6.0, 2.3 Hz, 1H), 4.05-4.02 (ddd, *J* = 11.2, 5.2, 1.2 Hz, 1H), 2.71-2.54 (m, 4H), 1.74-1.56 (m, 4H), 1.30-1.28 (m, 1H), 1.25 (d, *J* = 7.0 Hz, 3H), 1.13 (d, *J* = 6.9 Hz, 3H), 1.03 (d, *J* = 6.2 Hz, 3H), 0.93 (t, *J* = 7.4 Hz, 3H) ppm.

**<sup>13</sup>C NMR** (500 MHz, Chloroform-*d*) δ 170.3, 147.5, 125.5, 74.5, 72.9, 45.3, 39.0, 38.1, 33.0, 32.5, 25.0, 17.7, 17.2, 10.3, 9.4 ppm.

**MS (HR-ESI+)** found 283.1900, for [M+H]<sup>+</sup> calculated 283.1910; found 305.1720, calculated for [M+Na]<sup>+</sup> 305.1729; found 265.1796, calculated for [M-H<sub>2</sub>O+H]<sup>+</sup> 265.1804.

### 2.15 Enzymatic synthesis and analysis of compound 15/16

In order to conduct NMR analysis of compound **15/16**, the reaction volume was scaled up to 50 mL and a purification strategy was established. Final concentrations of 600 μM pentaketide substrate **9** (10.46 mg, dissolved in DMSO), 4000 μM F-Mal-CoA and 1000 μM NADPH were dissolved in assay buffer (250 mM potassium phosphate, 10 % glycerol, pH 7) and 10 μM **H1** (90.57 mg, dissolved in 250 mM potassium phosphate, 10 % glycerol, pH 7) was added to a final volume of 50 mL. The reaction mixture (slightly cloudy emulsion) was incubated for 22.5 h at 25 °C and the progress of the reaction was monitored by HPLC (samples were prepared by quenching 20 μL mixture with 60 μL methanol). The reaction mixture was transferred to two 50 mL falcon tube and the aqueous phase was extracted with EtOAc (4-6 × 25 mL) by spinning for 1 min at 3000 rcf to separate the phases. The combined organic phases were transferred to a 250 mL round bottom glass flask, the solvent was evaporated *in vacuo*. The residual oil was dissolved in MeOH/CHCl<sub>3</sub> (9/1) and purified with an uHPLC system (Thermo Fisher) on a Synchronis aQ-C18-LC column. Fractions containing the major fluorinated compound, based on <sup>19</sup>F-NMR analysis, were further purified with flash chromatography. The crude product was adsorbed to silica gel and purified (silica column: 1.3 cm diameter and 12 cm height) using a gradient for elution (hexane:EtOAc 20:1 → 15:1 → 10:1 → 7:1 → 5:1 → 4:1 → 3:1 → 1:1) and every fraction was carefully analyzed by TLC. All fractions containing product were pooled, filtered and the solvent was evaporated *in vacuo* to yield compound **16** as white solid.

**R<sub>F</sub>-value** (TLC; hexane/EtOAc: 3/1): 0.22

**Retention time** (HPLC; water/ACN): 13.23 min

**<sup>1</sup>H NMR** (500 MHz, Chloroform-*d*) δ 5.70 (dd, *J* = 15.6, 8.0 Hz, 1H), 5.51 (dd, *J* = 15.7, 0.8 Hz, 1H), 4.84 (d, *J* = 48.4 Hz, 1H), 3.41 (ddd, *J* = 9.0, 5.5, 3.7 Hz, 1H), 2.54-2.47 (m, 1H), 2.41-2.34 (m, 1H), 2.07-2.00 (m, 1H), 1.92-1.87 (m, 1H), 1.66 (q, *J* = 12.8 Hz, 1H), 1.61-1.55 (m, 1H), 1.44-1.35 (m, 1H), 1.11 (d, *J* = 6.4 Hz, 3H), 1.08 (d, *J* = 6.8 Hz, 3H), 0.98-0.95 (ovlp m, 6H)

**<sup>19</sup>F NMR** (500 MHz, Chloroform-*d*) δ -206.21(d, *J* = 46,8 Hz)

**<sup>13</sup>C NMR** from HSQC (500 MHz, Chloroform-*d*) δ 134.1, 131.5, 94.8/96.4, 76.5, 42.4, 42.2, 38.7, 36.9, 27.0, 13.4, 15.2, 10.4, 13.6

**MS (HR-ESI+)** found 273.1859, for [M+H]<sup>+</sup> calculated 273.1866; found 295.1677, calculated for [M+Na]<sup>+</sup> 295.1686; found 255.1754, calculated for [M-H<sub>2</sub>O+H]<sup>+</sup> 255.1761; found 567.3462, calculated for [M<sub>2</sub>+Na]<sup>+</sup> 567.3474

### 2.16 Enzymatic synthesis and analysis of compound 18

In order to conduct NMR analysis of compound **18**, the reaction volume was scaled up to 50 mL and a purification strategy was established. Final concentrations of 600 μM pentaketide

substrate **9** (10.46 mg, dissolved in DMSO), 800  $\mu\text{M}$  F-MM-CoA and 1000  $\mu\text{M}$  NADPH were dissolved in assay buffer (250 mM potassium phosphate, 10 % glycerol, pH 7) and 7  $\mu\text{M}$  **H1** (63.40 mg, dissolved in 250 mM potassium phosphate, 10 % glycerol, pH 7) was added to a final volume of 50 mL. The reaction mixture (slightly cloudy emulsion) was incubated for at least 4 h at 25 °C and the progress of the reaction was monitored by HPLC (samples were prepared by quenching 20  $\mu\text{L}$  mixture with 60  $\mu\text{L}$  methanol). The reaction mixture was transferred to two 50 mL falcon tube and the aqueous phase was extracted with EtOAc (5  $\times$  25 mL) by spinning for 1 min at 3000 rcf to separate the phases. The combined organic phases were transferred to a 250 mL round bottom glass flask, the solvent was evaporated *in vacuo*. The residual oil was purified with flash chromatography. After running a TLC (hexane/EtOAc 2:1 stained with  $\text{KMnO}_4$ -solution), the crude product was adsorbed to silica gel and purified (silica column: 1.3 cm diameter and 12 cm height) using a gradient for elution (hexane:EtOAc 30:1  $\rightarrow$  15:1  $\rightarrow$  10:1  $\rightarrow$  7:1  $\rightarrow$  5:1  $\rightarrow$  4:1  $\rightarrow$  3:1  $\rightarrow$  2:1  $\rightarrow$  1:1) and every fraction was carefully analyzed by TLC. All fractions containing the product were pooled, filtered and the solvent was evaporated *in vacuo* to yield compound **18** as white solid. The educt could not be separated by this procedure as co-eluting with compound **18**.

**Yield:** 6 % (0.57 mg, 1.8  $\mu\text{mol}$ ). Note on the yield: Without any optimization, we yielded about 6 % of the fluorinated 10-deoxymethynolide (**18**). Recently, a similar yield was reported for the elongation of the pentaketide (**9**) with the native MM-CoA by wildtype DEBS M6, and the TE was identified as the bottleneck hindering macrolactonization<sup>3</sup>. These results indicate that the AT domain exchange is not responsible for the low yield.

The enzymatic reaction with **H1.1** was performed with slightly different conditions: In a 250 mL round-bottom flask, final concentrations of 300  $\mu\text{M}$  pentaketide substrate **9** (8.67 mg, dissolved in 200 mM DMSO stock, added last), 600  $\mu\text{M}$  F-MM-CoA (43.9 mg, dissolved in 60 mM  $\text{H}_2\text{O}$  stock) and 500  $\mu\text{M}$  NADPH (34.58 mg) were dissolved in assay buffer (250 mM potassium phosphate, 10 % glycerol, pH 7.0). 9  $\mu\text{M}$  hybrid **H1.1** (138 mg, dissolved in 250 mM potassium phosphate, 10 % glycerol, pH 7) was added and the slightly cloudy reaction mixture was slowly stirred for 16 h at 25 °C. The reaction mixture was transferred into 2  $\times$  50 mL falcon tubes. The aqueous phase was extracted with EtOAc (5  $\times$  20 mL) and phase separation was achieved by centrifugation (15,500  $\times$  g, 4 °C, 15 min). The organic phases were combined, transferred into a separation funnel and washed with  $\text{H}_2\text{O}$  (2  $\times$  50 mL). The aqueous phase was discarded and the organic phase was dried over  $\text{MgSO}_4$ , filtered and the solvent was evaporated *in vacuo*. Crude product was purified using a Synchronis<sup>TM</sup> Silica column (4.6  $\times$  250 mm, particle size 5  $\mu\text{m}$ , ThermoFisher Scientific; Part No.: 97005-254630) on a Dionex UltiMate 3000 RS UHPLC equipped with a RS Diode Array UV detector. The mobile phase system is consisting of buffer A (n-hexane) and buffer B (EtOAc). The column was equilibrated with 95 % buffer A and 5 % buffer B at a flow rate of 1.0 mL  $\text{min}^{-1}$ . Compound **18** was purified using a linear gradient from 5 to 100 % buffer B over 40 minutes and another 5 minutes at 100 % buffer B. A linear gradient to 5 % buffer B was used within 2 minutes and the column was re-equilibrated for another five more minutes at 5 % buffer B. Fractionation was performed using the UltiMate 3000 Autosampler in between 0 and 40 minutes in 60 seconds steps. Fractions containing compound **18** were pooled and the solvent was evaporated *in vacuo* to yield compound **18** in high purity.

**Yield:** 27 % (1.8 mg, 5.73  $\mu\text{mol}$ )

**R<sub>F</sub>-value** (TLC; n-hexane/EtOAc: 3/1): 0.29

**Retention time** (HPLC; n-hexane/acetone): 13 – 14 min

**Retention time** (HPLC; water/ACN): 14.65 min

**<sup>1</sup>H NMR** (500 MHz, Chloroform-*d*)  $\delta$  = 6.77 (dd,  $J$  = 15.7, 5.5 Hz, 1H), 6.47 (dd,  $J$  = 15.7, 1.3 Hz, 1H), 5.07 (ddd, 1H,  $J$  = 8.1, 5.5, 1.9 Hz), 3.67 (dd,  $J$  = 26.4, 1.1 Hz, 1H), 2.71 – 2.65 (m, 1H), 2.56 – 2.47 (m, 1H), 2.03 – 1.96 (m, 1H), 1.85 – 1.76 (m, 1H), 1.68 – 1.62 (m, 1H), 1.65 (d,  $J$  = 22 Hz, 3H), 1.44 – 1.38 (m, 1H), 1.31-1.24 (m, 1H), 1.20 (d,  $J$  = 7.0 Hz, 3H), 1.17 (d,  $J$  = 6.9 Hz, 3H), 1.02 (d,  $J$  = 6.7 Hz, 3H), 0.95 (t,  $J$  = 7.4 Hz, 3H) ppm.

**<sup>19</sup>F NMR** (471 MHz, Chloroform-*d*)  $\delta$  = -172.46 (quintet,  $J$  = 22.5 Hz) ppm.

**<sup>13</sup>C NMR** (126 MHz, CDCl<sub>3</sub>)  $\delta$  = 205.02, 171.22, 146.54, 126.42, 99.53, 78.46, 75.72, 45.25, 38.07, 33.26, 32.95, 25.43, 23.17, 18.07, 17.91, 10.46, 9.68 ppm.

**MS (HR-ESI+)** found 315.1961, for [M+H]<sup>+</sup> calculated 315.1972; found 337.1781, calculated for [M+Na]<sup>+</sup> 337.1791; found 297.1857, calculated for [M-H<sub>2</sub>O+H]<sup>+</sup> 297.1866

| Position | $\delta$ <sup>1</sup> H (mult., J Hz) | $\delta$ <sup>13</sup> C | COSY          | HMBC               | NOESY                 |
|----------|---------------------------------------|--------------------------|---------------|--------------------|-----------------------|
| 1        | -                                     | 171.1                    | -             | -                  | -                     |
| 2        | -                                     | 99.5                     | -             | -                  | -                     |
| 3        | 3.67 (dd, $J$ = 26.4, 1.1)            | 78.5                     | -             | 5, 14, 15          | 4, 14, 15             |
| 4        | 1.44 – 1.38 (m)                       | 33.3                     | 5, 15         | 16                 | 3, 5', 5'', 15        |
| 5'       | 2.03-1.96 (m)                         | 33.0                     | 5'', 6        | 3, 4, 6, 7, 15, 16 | 4, 5'', 6, 8, 16      |
| 5''      | 1.31-1.24 (m)                         | 33.0                     | 4, 5'         | 3                  | 5', 6                 |
| 6        | 2.56 – 2.47 (m)                       | 45.3                     | 5', 16        | 7                  | 4, 5', 5'', 15, 16    |
| 7        | -                                     | 205.0                    | -             | -                  | -                     |
| 8        | 6.47 (dd, $J$ = 15.7, 1.3)            | 126.4                    | 9, 10         | 7, 9, 10           | 5', 9, 10, 16, 17     |
| 9        | 6,77 (dd, $J$ = 15.7, 5.5)            | 146.5                    | 8, 10         | 7, 10, 17          | 8, 10, 11             |
| 10       | 2.71 – 2.65 (m)                       | 38.1                     | 8, 9, 11, 17  | 8, 9, 11, 17       | 8, 9, 11, 12', 13, 17 |
| 11       | 5.08 (ddd, $J$ = 8.2, 5.5, 1.9)       | 75.7                     | 10, 12', 12'' | 1, 17              | 9, 10, 12', 12'', 13  |
| 12'      | 1.85 – 1.76 (m)                       | 25.4                     | 11, 13, 12''  | 10, 11, 13         | 10, 11, 12'', 13, 17  |
| 12''     | 1.68 – 1.62 (m)                       | 25.4                     | 11, 13, 12'   | 13                 | 11, 12', 13, 17       |
| 13       | 0.95 (t, $J$ = 7.4)                   | 10.5                     | 12', 12''     | 11, 12             | 10, 11, 12', 12''     |
| 14       | 1.65 (d, $J$ = 22)                    | 23.2                     | -             | 1, 2, 3            | 3                     |
| 15       | 1.02 (d, $J$ = 6.7)                   | 17.9                     | 4             | 3, 4, 5            | 3, 4, 6, 5''          |
| 16       | 1.20 (d, $J$ = 7.0)                   | 18.1                     | 6             | 5, 6, 7            | 5', 6, 8              |
| 17       | 1.17 (d, $J$ = 6.9)                   | 9.7                      | 10            | 9, 10, 11          | 8, 10, 12', 12''      |

### 2.17 Biotransformation of compound 18

The following biotransformation reaction was carried out in an analogous manner to the published procedures with minor modifications<sup>8-10</sup>. A 3 mL seed culture of SCM medium (20 g soytone, 15 g soluble starch, 10.5 g MOPS, 1.5 g yeast extract, 0.1 g CaCl<sub>2</sub>, per 1 L water, pH 7.2 ) in 15 mL snap cap tube was inoculated with 3  $\mu$ L of *Streptomyces venezuelae* strain DHS316 or YJ112 spore stock and shaken overnight at 28 °C (180 rpm). The OD600 was measured and this was used to inoculate a 10 mL biotransformation culture of SCM medium to an OD600 of ~0.1. The culture was incubated at 28 °C (180 rpm) for 1 h, prior to the addition of 2  $\mu$ L of acetyl-narbolide as a DMSO solution (20 mg/mL) followed by the macrolactone **18** as a DMSO solution (~75  $\mu$ L). The cultures were incubated at 28 °C for 18 h (180 rpm) and centrifuged at 4,000  $\times$  g for 10 min to remove cell debris. The remaining aqueous solution was saturated with NaCl prior to adjusting the pH to 11 with 10 N NaOH. The solution was extracted with 3  $\times$  10 mL of ethyl acetate, and the combined organic layers were dried over anhydrous Na<sub>2</sub>SO<sub>4</sub>. Solvent was removed under reduced pressure to yield crude product mixture. The reactions were analyzed by LCMS.

**MS (HR-ESI+)** **19** found 472.3082, for [M+H]<sup>+</sup> calculated 472.3075; **20** found 488.2997, calculated for [M+H]<sup>+</sup> 488.3024

### 3. Substrate synthesis

#### 3.1 Chemicals

Reagents were purchased from Merck, Carl-Roth and abcr GmbH. All the reagents were used as purchased without any further purification. Reactions were carried out in oven-dried glassware under an inert Argon gas atmosphere. Reactions were magnetically stirred and monitored by thin layer chromatography (TLC) on 0.25 mm E. Merck silica gel plates (60F-254) using UV light as visualizing agent and  $\text{KMnO}_4$  stain & heat as developing agents. Room temperature when mentioned ranges from 22 to 25 °C. E. Merck silica gel (60, particle size 0.040-0.060 mm) was used for column chromatography. The NMR spectra were determined on Bruker DPX250, on Bruker AV400, on Bruker AV500 or on Bruker DRX600 using deuterated solvents from the company Deutero GmbH, Kastellaun. Chemical shifts values are expressed in parts per million (ppm) relative to chloroform ( $\delta$  7.27), DMSO ( $\delta$  2.51) or water ( $\delta$  4.79). Multiplicities are explained using following abbreviations: s = singlet, d = doublet, t = triplet, q = quartet, m = multiplet, dd = doublet of doublet, dq = doublet of quartet, ddd = doublet of doublet of doublet. High resolution Electrospray Ionization mass spectra were obtained on ThermoFisher Surveyor MSQ.

#### 3.2 Fluoromalonyl-CoA

##### Fluoro-Meldrum's acid (S1)

Fluoro-Meldrum's acid (S1) was synthesized from Meldrum's acid in three steps using a previously described method <sup>11</sup>.

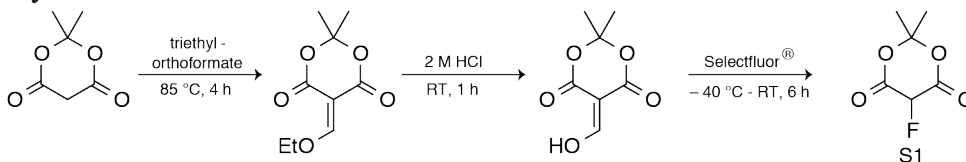

**Yield** (over three steps): 44 % (5.1 g), colorless solid.

**<sup>1</sup>H NMR** (400 MHz, C<sub>2</sub>D<sub>6</sub>OS)  $\delta$  = 6.69 (d,  $J$  = 41.6 Hz, 1H), 1.82 (s, 3H), 1.71 (s, 3H) ppm.

**<sup>19</sup>F NMR** (300 MHz, C<sub>2</sub>D<sub>6</sub>OS)  $\delta$  = -207.9 (d,  $J$  = 42 Hz, 1H) ppm.

##### Fluoromalonic acid thiophenyl halfester (S2)

The thiophenyl halfester (S2) was synthesized from fluoro-Meldrum's acid S1 and trimethylsilylthiophenol, which was produced utilizing the butyllithium method <sup>11</sup>.

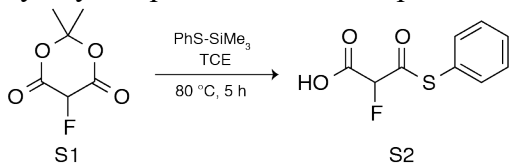

**Yield:** 53 % (0.7 g), yellowish powder.

**<sup>1</sup>H NMR** (400 MHz, C<sub>2</sub>D<sub>6</sub>OS)  $\delta$  = 7.64-7.50 (m, 3H), 7.49-7.46 (m, 2H), 5.95 (d,  $J$  = 47.2 Hz, 1H) ppm.

**<sup>19</sup>F NMR** (300 MHz, C<sub>2</sub>D<sub>6</sub>OS)  $\delta$  = -192.5 (d,  $J$  = 48 Hz) ppm.

### Fluoromalonyl-CoA (1)

Fluoromalonyl-CoA (1) was synthesized via transacylation from the fluoromalonyl thiophenyl halfester S2 to free coenzyme A (CoASH), adapted from Dunn *et al.*<sup>12</sup>.

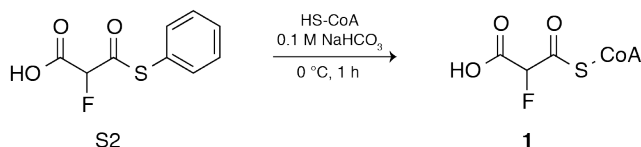

CoASH (30 mg; 38  $\mu$ mol) and the fluoromalonyl thiophenyl halfester (44 mg; 205  $\mu$ mol) were dissolved in 1 mL ice cold NaHCO<sub>3</sub> (0.1 M) at 0 °C. The pH was adjusted back to pH 8-9 with 1 mL NaOH (0.2 M) and the reaction was continued for 1 h at 0 °C. Then, the reaction mixture (2 mL) was poured into 15 mL acetone (-20 °C) in a 50 mL falcon and spun for 10 min at 3000 rcf. The supernatant was discarded and the pellet was washed with acetone (-20 °C) and dried by air stream. The pellet was dissolved in water and the yield was determined by the absorbance at 260 nm ( $\epsilon = 16,400 \text{ M}^{-1} \text{ cm}^{-1}$ )<sup>13</sup>.

**Yield:** 81 %, white crystals.

**<sup>1</sup>H NMR** (400 MHz, D<sub>2</sub>O)  $\delta = 8.54$  (s, 1H), 8.25 (s, 1H), 6.18-6.13 (m, 1H), 5.33 (d,  $J = 50.3$  Hz, 1H), 4.83-4.79 (m, 2H), 4.58-4.53 (m, 1H), 4.25-4.17 (m, 1H), 3.99 (s, 1H), 3.83-3.76 (m, 1H), 3.55-3.47 (m, 1H), 3.47-3.39 (m, 2H), 3.37-3.30 (m, 2H), 3.10-3.03 (m, 2H), 2.47-2.37 (m, 2H), 0.85 (s, 3H), 0.70 (s, 3H) ppm.

**<sup>19</sup>F NMR** (300 MHz, D<sub>2</sub>O)  $\delta = -177.4$  (d,  $J = 54$  Hz),  $-182.0$  (M) ppm.

**HRMS (ESI+)** found 872.1138, calculated for  $[\text{M}+\text{H}]^+$  872.1141.

### 3.3 Diketide SNAC (2)

#### (4S, 2'S, 3'R)-3-(2'-Methyl-3'-hydroxypentanoyl)-4-benzyl-2-oxazolidinone (S4)

Compound S4 was synthesized from Evans auxiliary S3 using the method of Sharma *et al.*<sup>14</sup>. The product was triturated with EtOAc, *n*-hexane and *n*-pentane after column chromatography.

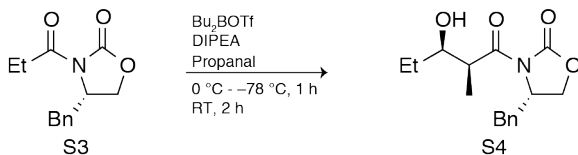

**Yield:** 69 % (4.3 g), white crystals.

**<sup>1</sup>H NMR** (400 MHz, CDCl<sub>3</sub>)  $\delta = 7.37$ -7.21 (m, 5H), 4.75-4.69 (m, 1H), 4.27-4.19 (m, 2H), 3.90-3.86 (m, 1H), 3.81 (dq,  $J = 2.7, 7.0$  Hz, 1H), 3.27 (dd,  $J = 3.4, 13.5$  Hz, 1H), 2.81 (dd,  $J = 9.4, 13.4$  Hz, 1H), 1.65-1.43 (m, 2H), 1.27 (d,  $J = 7.0$  Hz, 3H), 0.99 (t,  $J = 7.5$  Hz, 3H) ppm.

#### (2S, 3R) 3-hydroxy-2-methylpentanoyl-S-N-acetylcysteamine thioester (2)

Diketide SNAC 2 was synthesized in two steps from compound S4 following protocols of Sharma *et al.* and Peter *et al.*<sup>14,15</sup>.

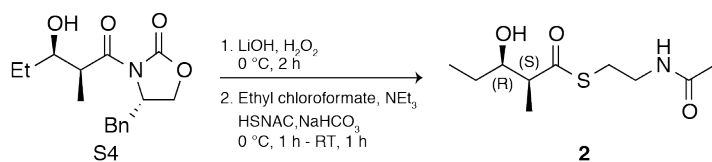

3-hydroxy-2-methyl-pentanoic acid was obtained almost quantitatively following the instructions of Sharma *et al.* and was used without further purification. To the acid (220 mg, 1.66 mmol) in 5 ml THF cooled to 0 °C, 148  $\mu\text{L}$  ethyl chloroformate (168 mg, 1.55 mmol) and 215  $\mu\text{L}$   $\text{NEt}_3$  (157 mg, 1.55 mmol) were added at 0 °C. The reaction mixture was stirred excessively for 45 min at 0 °C. Then, 224  $\mu\text{L}$  *N*-acetylcysteamine (251 mg, 2.00 mmol) and 54 mg  $\text{NaHCO}_3$  dissolved in 2 mL  $\text{H}_2\text{O}$  were added and the reaction mixture was further stirred for 1 h at RT. The aqueous phase was extracted with  $\text{EtOAc}$  ( $3 \times 20$  mL) and the combined organic phases were washed with  $\text{H}_2\text{O}$  (20 mL). The organic phase was dried over anhydrous  $\text{MgSO}_4$ , filtered and the solvent was evaporated *in vacuo*. The crude product was purified by column chromatography (silica gel,  $\text{DCM}:\text{Acetone}$  10:1  $\rightarrow$  8:1  $\rightarrow$  6:1  $\rightarrow$  4:1) to yield 128 mg (33 %) product **2** as clear liquid.

**Yield:** 33 % (128 mg), clear liquid.

**$^1\text{H NMR}$**  (400 MHz,  $\text{CDCl}_3$ )  $\delta$  = 5.76 (s, br, 1H), 3.88-3.83 (m, 1H), 3.53-3.41 (m, 2H), 3.10-2.99 (m, 2H), 2.78-2.72 (m, 1H), 1.98 (s, 3H), 1.57-1.43 (m, 2H), 1.23 (d,  $J$  = 7.0 Hz, 3H) 0.99 (t,  $J$  = 7.4 Hz, 3H) ppm.

**MS (ESI+)** found 234.12, for  $[\text{M}+\text{H}]^+$  calculated 234.12; found 256.24, calculated for  $[\text{M}+\text{Na}]^+$  256.10.

### 3.4 Fluoromethylmalonyl-CoA (17)

#### Fluoromethyl-Meldrum's acid (S5)

2,2,5-Trimethyl-1,3-dioxane-4,6-dione (Methyl Meldrum's acid) was either synthesized from methylmalonic acid after the protocol of Bravo-Rodriguez *et al.* or purchased from Merck <sup>16</sup>.

**Yield:** 73 % (1.96 g), white crystals.

**$^1\text{H NMR}$**  (400 MHz,  $\text{CDCl}_3$ )  $\delta$  = 3.58 (q,  $J$  = 7.0 Hz, 1H), 1.81 (s, 3H), 1.77 (s, 3H), 1.58 (d,  $J$  = 7.1 Hz, 3H) ppm.

Fluoromethyl-Meldrum's acid (S5) was synthesized from compound methyl Meldrum's acid.

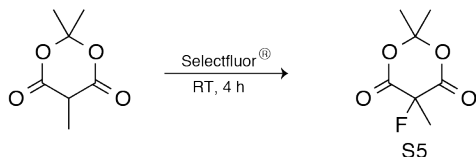

A dry, nitrogen-flushed round bottom flask (500 mL) equipped with a septum was charged with Methyl Meldrum's acid (5 g, 31.6 mmol), the finely powdered Selectfluor (11.8 g, 33.2 mmol;) and 250 mL dry acetonitrile was added. The mixture was stirred for 4 h at RT and solids dissolved after 90 min. The solvent was evaporated and ca. 100 mL  $\text{DCM}$  and 50 mL water were added. The phases were separated and the aqueous phase was extracted with  $\text{DCM}$  ( $3 \times 50$  mL). Combined organic phases were washed with brine, dried over  $\text{MgSO}_4$ , filtered and the solvent was evaporated *in vacuo* to yield crude Fluoromethyl-Meldrum's acid (5.1 g; 92 %, purity 90 %) as fine white crystals. The crude product still containing educt was adsorbed on silica and purified by column





acetone (-20 °C) and dried *in vacuo*. The pellet was dissolved in water and the yield was determined by the absorbance at 260 nm ( $\epsilon = 16,400 \text{ M}^{-1} \text{ cm}^{-1}$ )<sup>13</sup>.

**Yield:** 93 %, white crystals.

**<sup>1</sup>H NMR** (300 MHz, D<sub>2</sub>O)  $\delta = 8.57$  (s, 1H), 8.28 (s, 1H), 6.19 (d,  $J = 6.9 \text{ Hz}$ , 1H), 4.62-4.56 (m, 1H), 4.28-4.21 (m, 2H), 4.02 (s, 1H), 3.86-3.80 (m, 1H), 3.58-3.52 (m, 1H), 3.48-3.44 (m, 2H), 3.40-3.33 (m, 2H), 3.09-3.03 (m, 2H), 2.48-2.42 (m, 2H), 1.71 (d,  $J = 22 \text{ Hz}$ , 3H), 0.88 (s, 3H), 0.73 (s, 3H) ppm.

**<sup>19</sup>F NMR** (300 MHz, D<sub>2</sub>O)  $\delta = -146.7$  (q,  $J = 22 \text{ Hz}$ , 1H) ppm.

#### 4. Supplementary Figures:

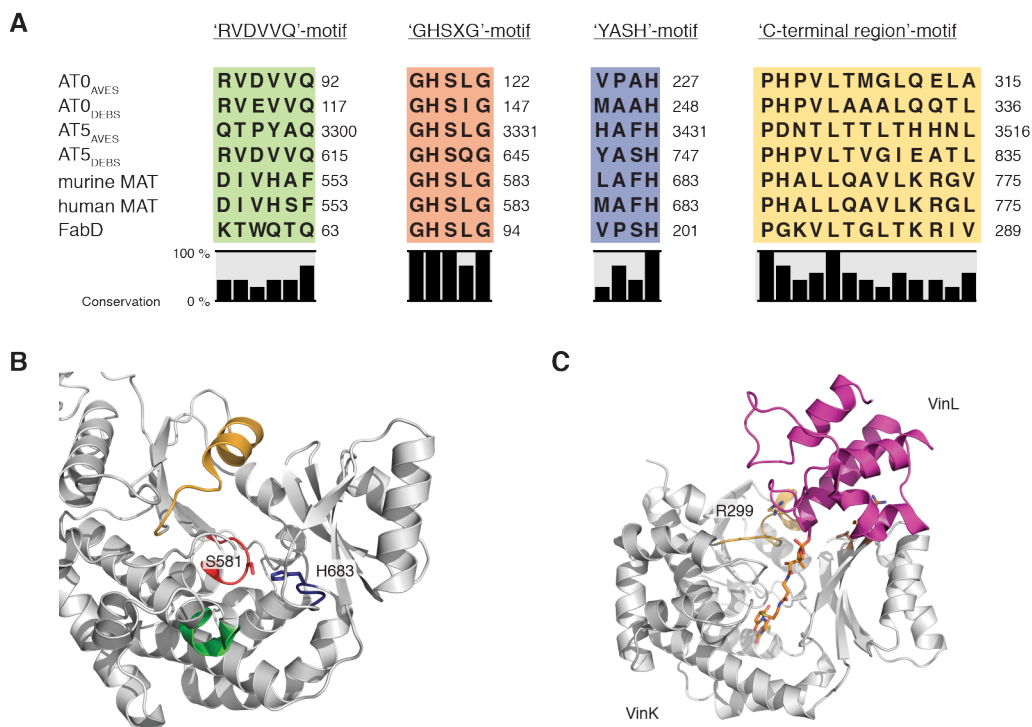

#### Supplementary Fig. 1: Substrate specificity of ATs.

(A) Sequence alignments of various ATs in regard to the four sequence motifs characterizing substrate specificity. Utilized primary sequences refer to loading-ATs: AT0<sub>AVES</sub> (Q79ZN1) and AT0<sub>DEBS</sub> (Q03131), specialized extender-ATs: AT5<sub>AVES</sub> (Q9S0R7), AT5<sub>DEBS</sub> (Q03133) and FabD (P0AAI9), and polyspecific ATs: murine MAT (P19096) and human MAT (P49327). The Uniprot code is given in brackets. (B) Cartoon depiction of the human MAT (PDB code: 3hhd) with sequence motifs colored as above. Active site serine (S581) is shown in sticks representation<sup>17</sup>. (C) Crystal structure of the VinK-VinL complex (PDB code: 5czd) in cartoon representation<sup>18</sup>. The ACP (VinL) was chemically cross-linked (sticks, orange) to the AT (VinK). The authors characterized the binding interface and identified crucial residues including R299 in the 'C-terminal' region (brightorange).

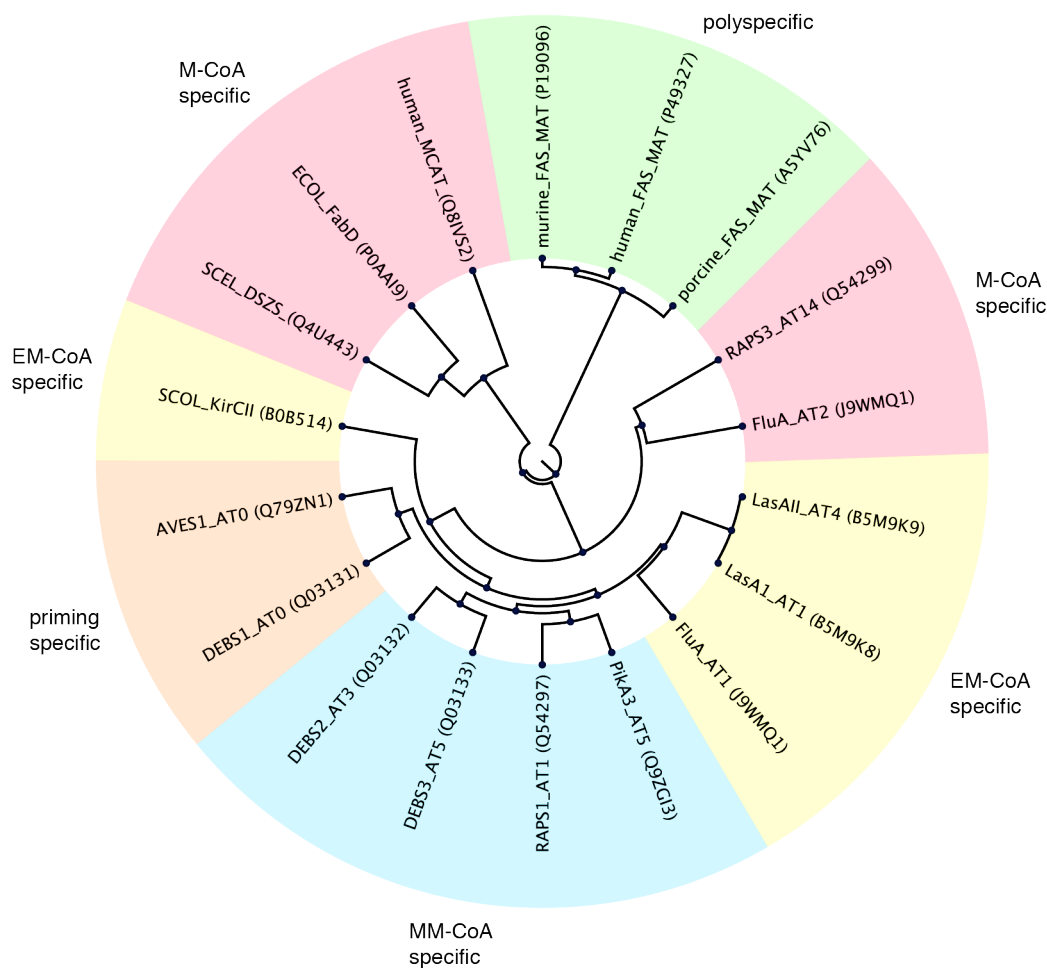

**Supplementary Fig. 2: Evolution of acyltransferase.**

Circular phylogram of select ATs is shown. Abbreviations refer to: RAPS – rapamycin polyketide synthase; LasA – Lasalocid modular polyketide synthase; Pika – Pikromycin polyketide synthase; DEBS – 6-deoxyerythronolide B synthase; AVES – avermectin polyketide synthase; DSZS – DisD protein; MCAT – mitochondrial malonyltransferase; FAS – type I fatty acid synthase. The UniProt code is given in brackets. The specificity is indicated by the background color. Phylogenetic tree was generated with CLC Main Workbench (version 6.9.1) using the UPGMA algorithm.

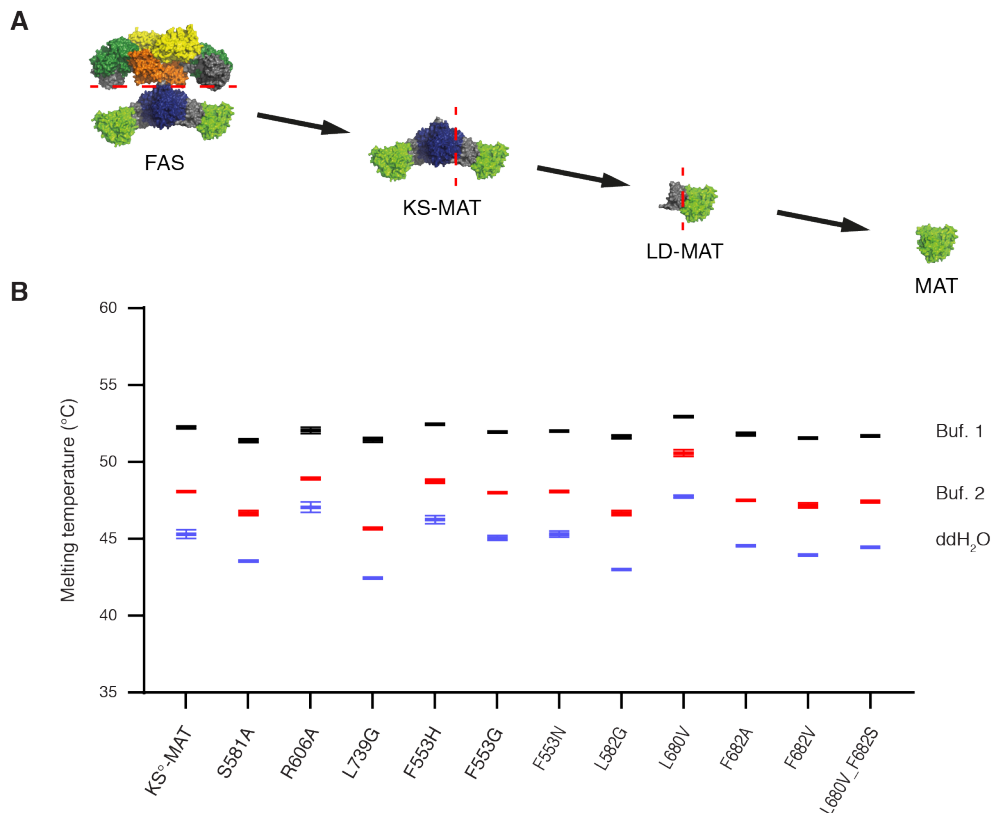

**Supplementary Fig. 3: Robustness of murine MAT fold.**

(A) The MAT domain can be released from the FAS fold and remains to be expressible in *E. coli*<sup>4</sup>. (B) Screen of melting temperatures of select MAT variants (KS<sup>0</sup>-MAT) bearing point mutations. Mutations are well tolerated and the melting temperatures vary by about 2-3 °C. Buffer 1 refers to storage buffer (250 mM potassium phosphate, 10 % (v/v) glycerol, 1 mM EDTA, (pH 7.0)) and buffer 2 to  $\alpha$ KGDH assay buffer (50 mM sodium phosphate, 10 % (v/v) glycerol, 1 mM EDTA (pH 7.6). Data were collected with enzyme from one preparation (n = 1) in technical replication (3 independent measurements) for each condition. Error bars show standard deviation.

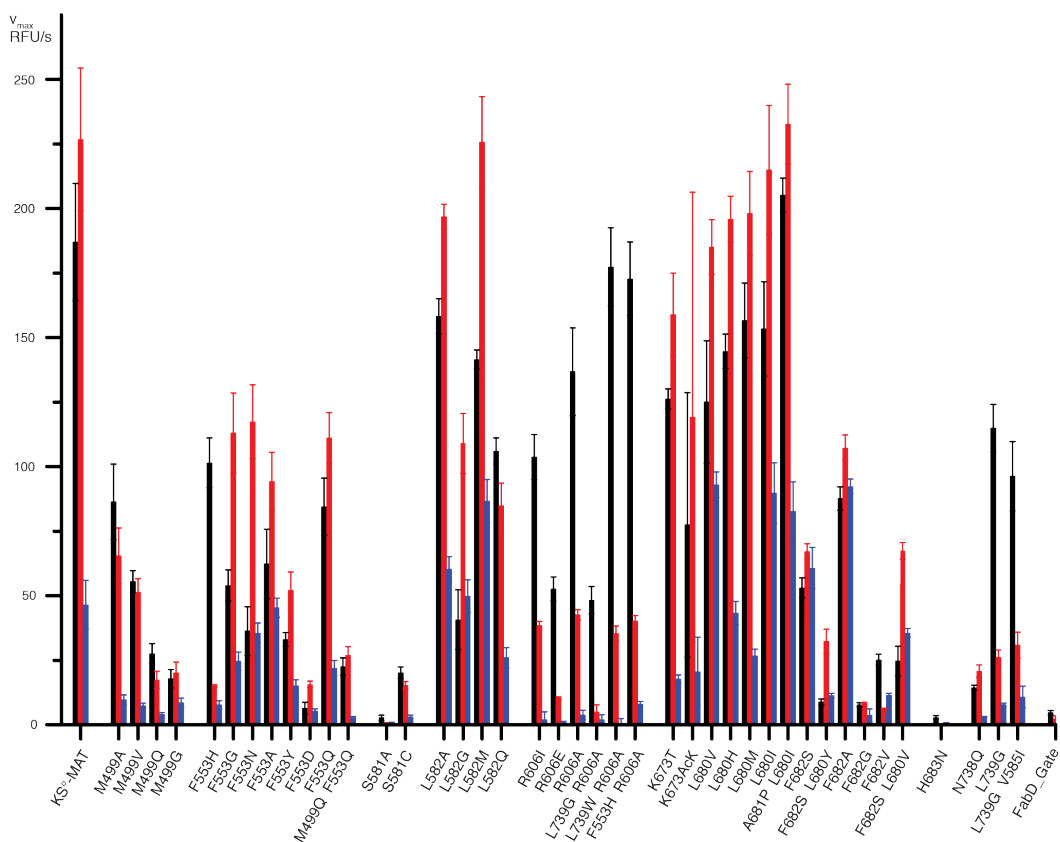

**Supplementary Fig. 4: Plasticity of the murine MAT domain.**

Initial velocity screen for the substrates acetyl- (black bar), malonyl- (red bar) and methylmalonyl-CoA (blue bar) were determined with the  $\alpha$ KGDH assay. Standard conditions were applied with fixed concentrations of substrates and ACP of 20  $\mu$ M and 60  $\mu$ M, respectively. Data were collected with enzyme from one preparation (n = 1) in technical replication (3 independent measurements). Error bars show standard deviation.

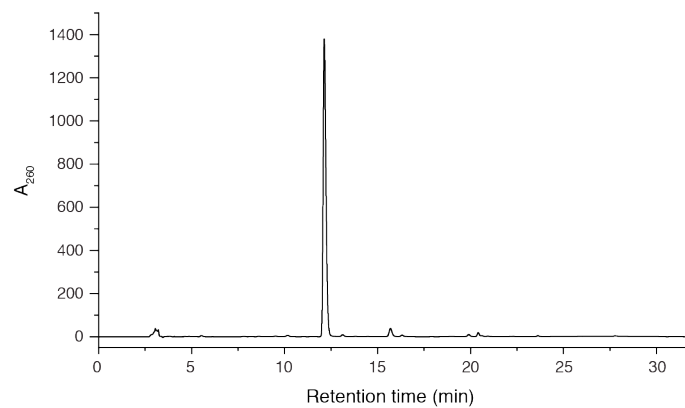

**Supplementary Fig. 5: Quality control of precipitated F-Mal-CoA.**

F-Mal-CoA was purified with HPLC-UV using the gradient described in method section, showing almost quantitative conversion of CoA (15.5 min). F-Mal-CoA (12.1 min) has a comparable elution time to Mal-CoA (12.0 min).

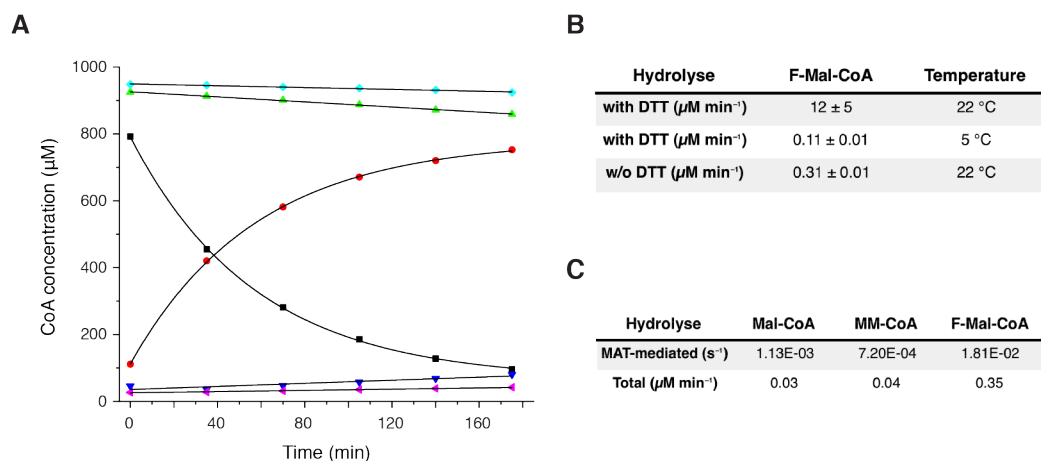

### Supplementary Fig. 6: Further information on F-Mal-CoA.

(A) F-Mal-stability was monitored with HPLC-UV using the gradient described in the method section. Peak areas were converted to concentrations using a CoA calibration curve. F-Mal-CoA degradation (black) and its corresponding CoA liberation (red) in buffer with DTT at 22 °C was fitted with an exponential decay function in OriginPro 8.5. Degradation without DTT at 5 °C (cyan: F-Mal-degradation, purple: CoA-liberation) and at 22 °C (green: F-Mal-degradation, blue: CoA-liberation) was fitted by linear regression (buffer: (400 mM phosphate buffer, 20 % (v/v) glycerol, 2 mM or 0 mM DTT, 1 mM EDTA, 0.8 % DMSO (pH 7.2)). (B) Initial slope average of F-Mal-degradation and CoA-liberation of the corresponding condition (C) Hydrolysis rates of the extender substrates determined by the  $\alpha$ KGDH assay. Final substrate concentrations in the assays were 20  $\mu\text{M}$  X-CoA and 0.2  $\mu\text{M}$  KS<sup>o</sup>-MAT. Fast F-Mal-CoA degradation by DTT was the reason why DTT was omitted in assays when using this substrate. (A-C) Data were collected with one batch of F-Mal-CoA.



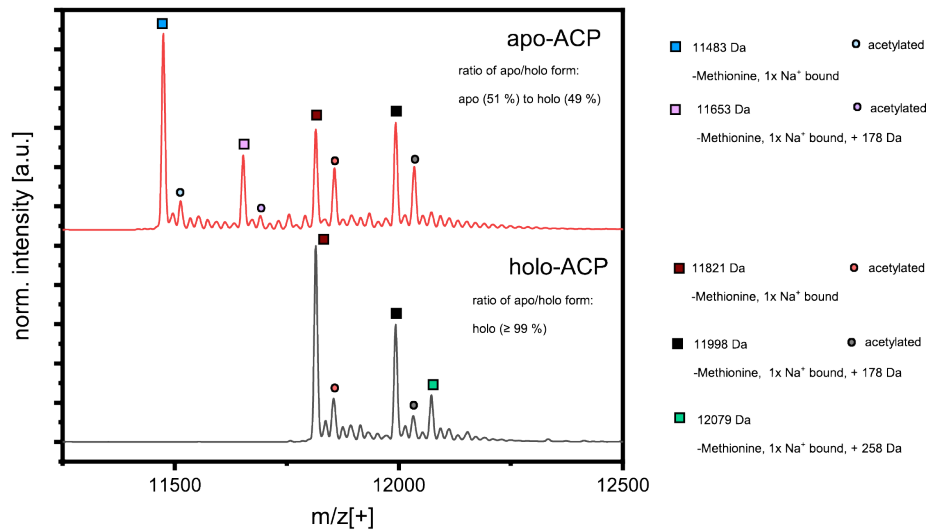

### Supplementary Fig. 7: Quality control of DEBS ACP6.

Mass spectrometric analysis of DEBS ACP6, co-expressed with Sfp (red) or Npt (black), was performed with ESI in positive mode (SYNAPT G-2, waters). Co-expression with Sfp led to a mixture of 49 % of phosphopantetheinlated (holo-form, brown square, theoretical mass: 11816.10 Da) and 51 % apo-form (blue square, theoretical mass = 11475.76 Da), while co-expression with Npt resulted in quantitative conversion to the holo-form. A mass shift of 178 Da (purple square for the apo-form and black square for the holo-form) and 258 Da (cyan square for the holo-form) could be explained by His-tag phosphogluconoylation in *E. coli*, whereas a mass shift of 42 Da corresponds to the acetylated form (circles with the corresponding color).

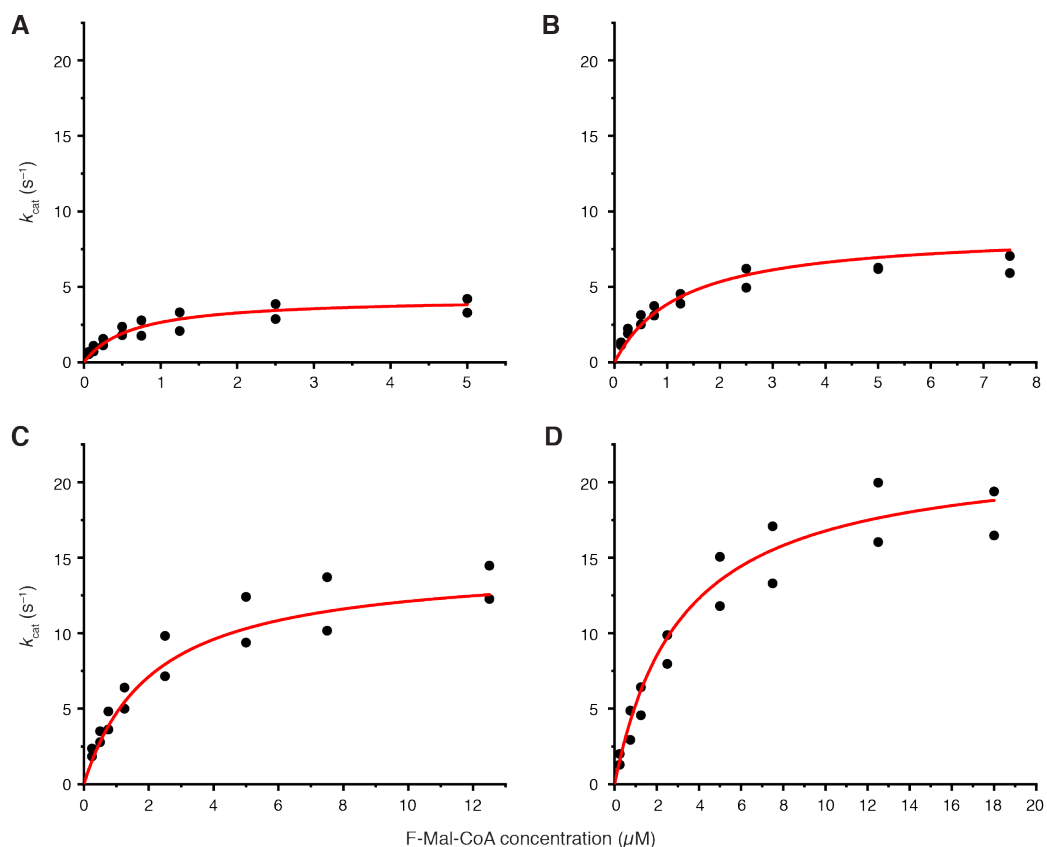

**Supplementary Fig. 8: Global Michaelis-Menten fit of FAS MAT-mediated transacylation of fluoromalonyl moieties to FAS ACP.**

Initial velocities were plotted against fluoromalonyl-CoA (F-Mal-CoA) concentrations at four fixed ACP concentrations: (A) 11  $\mu M$ , (B) 24  $\mu M$ , (C) 49  $\mu M$  and 100  $\mu M$  ACP. Data were fit globally with the Michaelis-Menten equation assuming a ping-pong bi-bi mechanism ( $n = 2$ ).

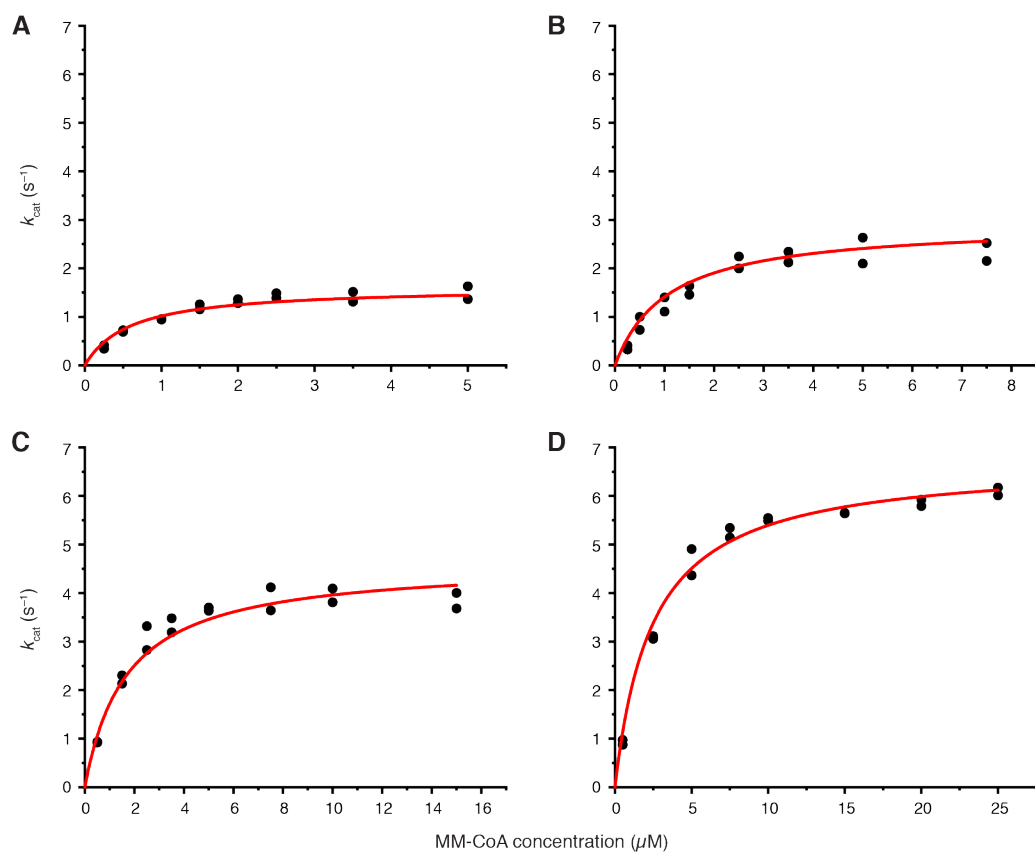

**Supplementary Fig. 9: Global Michaelis-Menten fit of FAS MAT-mediated transacylation of methylmalonyl moieties to DEBS ACP6.**

Initial velocities were plotted against methylmalonyl-CoA (MM-CoA) concentrations at four fixed ACP concentrations: (A) 53  $\mu M$ , (B) 107  $\mu M$ , (C) 200  $\mu M$  and 373  $\mu M$  ACP. Data were fit globally with the Michaelis-Menten equation assuming a ping-pong bi-bi mechanism ( $n = 2$ ).

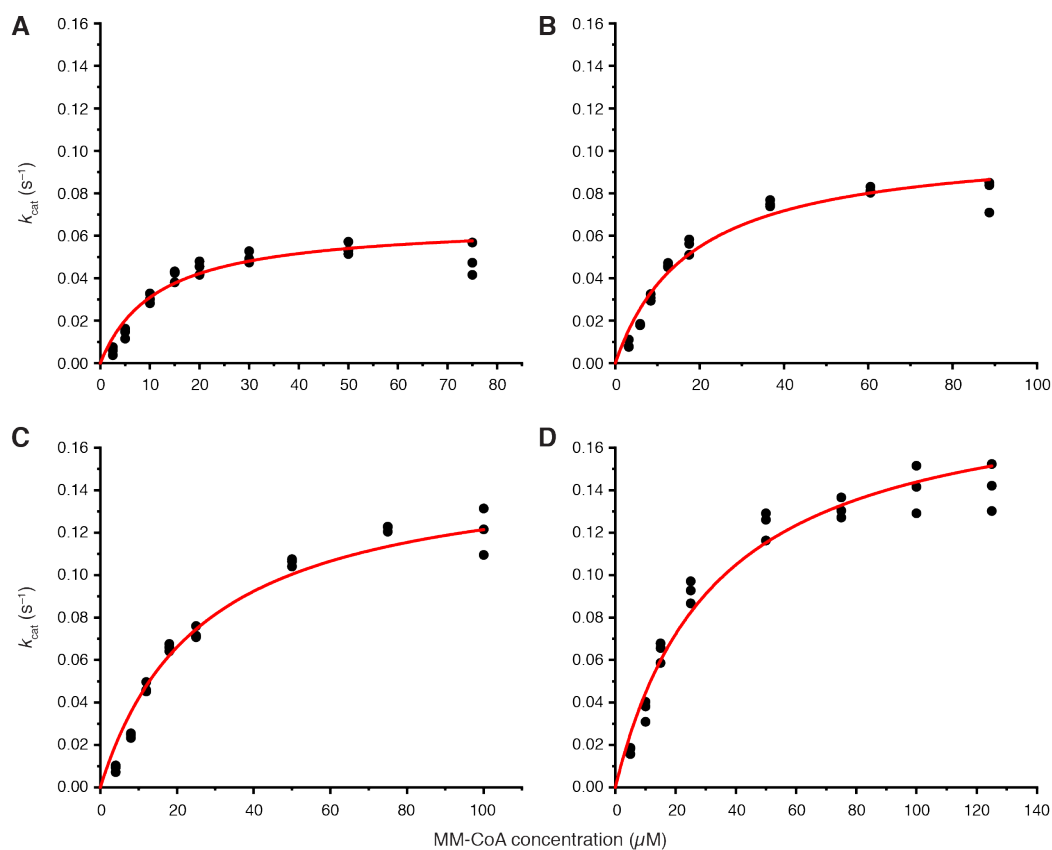

**Supplementary Fig. 10: Global Michaelis-Menten fit of DEBS AT6-mediated transacylation of methylmalonyl moieties to DEBS ACP6.**

Initial velocities were plotted against methylmalonyl-CoA (MM-CoA) concentrations at four fixed ACP concentrations: (A) 64 μM, (B) 119 μM, (C) 238 μM and 406 μM ACP. Data were fit globally with the Michaelis-Menten equation assuming a ping-pong bi-bi mechanism (n = 3).

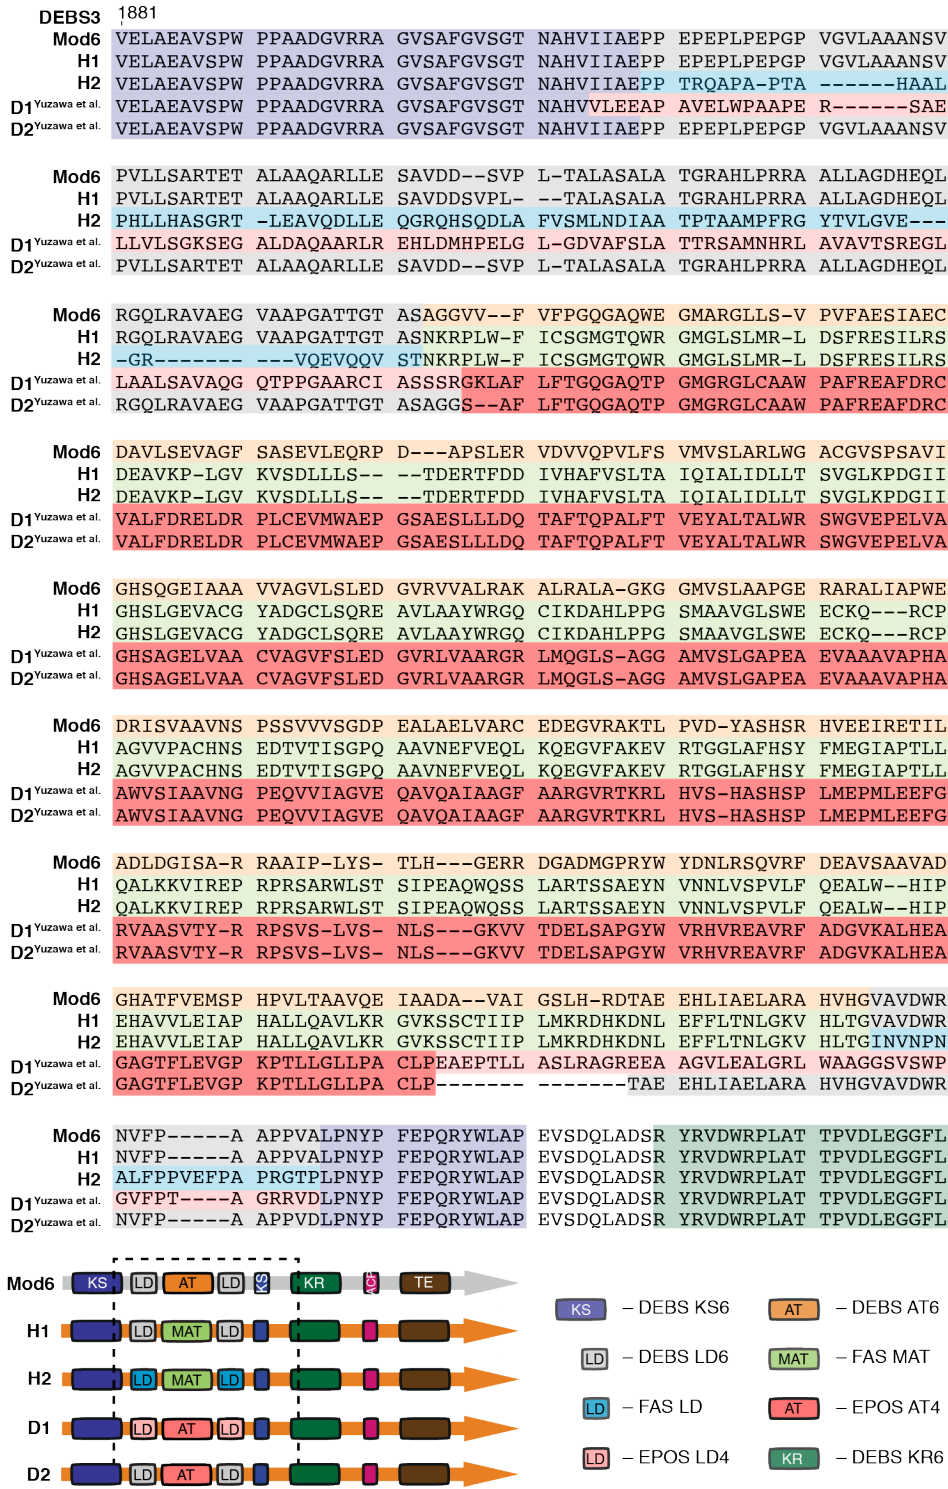

**Supplementary Fig. 11: Design of DEBS/FAS hybrids.**

Sequence alignment of wildtype DEBS M6+TE (**Mod6**) with both hybrid DEBS/FAS constructs **H1** and **H2**. In construct **H1**, the AT6 domain of DEBS was exchanged by the MAT domain of

murine FAS. For construct **H2**, the AT6 domain of DEBS plus the adjacent linker domain was exchanged with LD-MAT from murine FAS. The sequence alignment is colored according to the color code of the attached domain architecture. Respective DNA sequences are shown in Supplementary Table 6. For comparison, we also integrated constructs **D1** and **D2** from Yuzawa *et al.* into the sequence alignment<sup>6</sup>. Our hybrid **H1** is similar to their **D2**, although we defined the terminal long  $\alpha$ -helix as part of MAT and not as part of the post-AT linker.

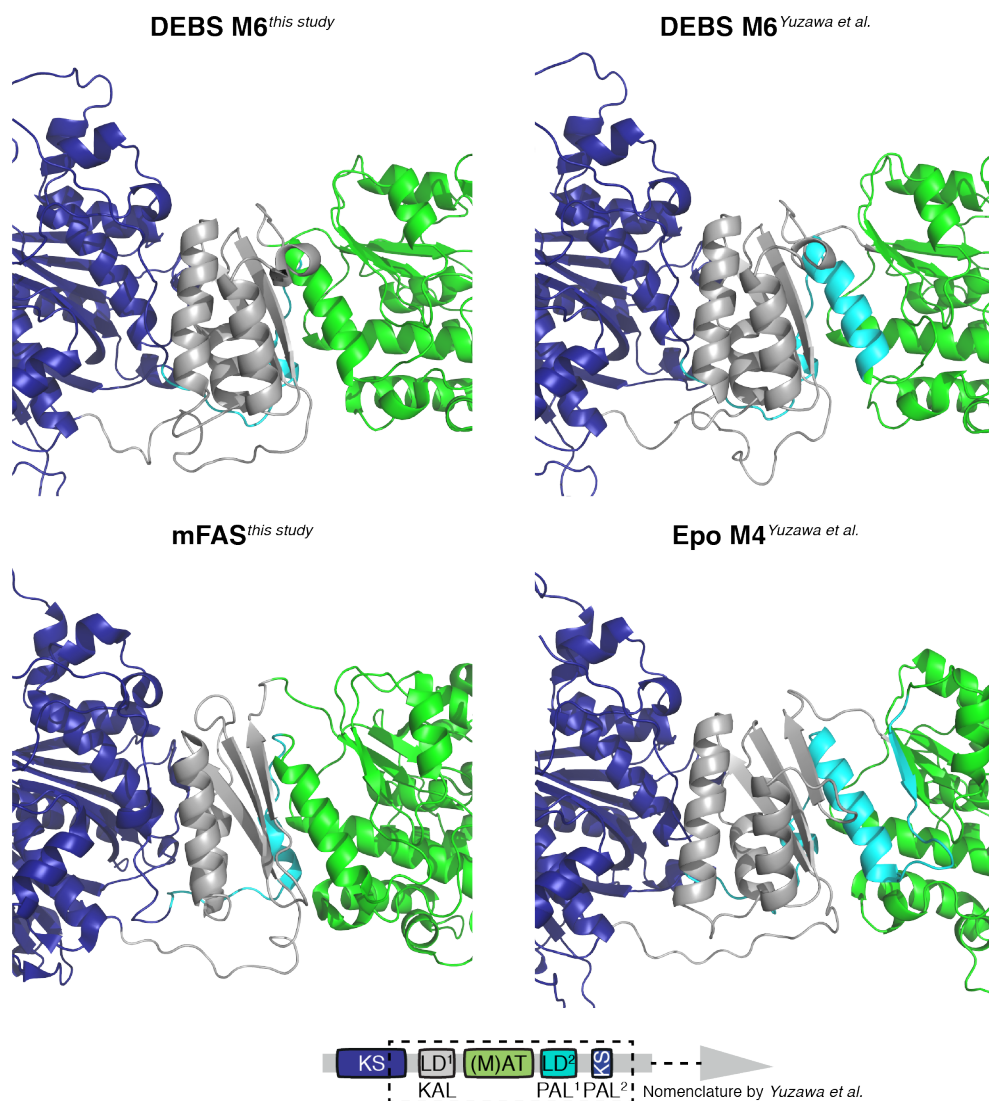

### Supplementary Fig. 12: Comparison of domain boundaries.

Cartoon depiction of the KS-AT architecture with different defined boundaries in respect of the linker domain. The KS-AT structures of DEBS M6 (based on DEBS M3, PDB code: 2qo3) and Epo M4 (based on curacin A PKS, PDB code: 4mz0) were modeled by Swissmodel<sup>19–23</sup> and compared to the X-ray structure of mFAS (5my0)<sup>1</sup>. Boundaries vary especially in the long terminal  $\alpha$ -helix, which we defined as part of the (M)AT and *Yuzawa et al.* as part of the LD<sup>2</sup> (they used the nomenclature PAL<sup>1</sup>)<sup>6</sup>.

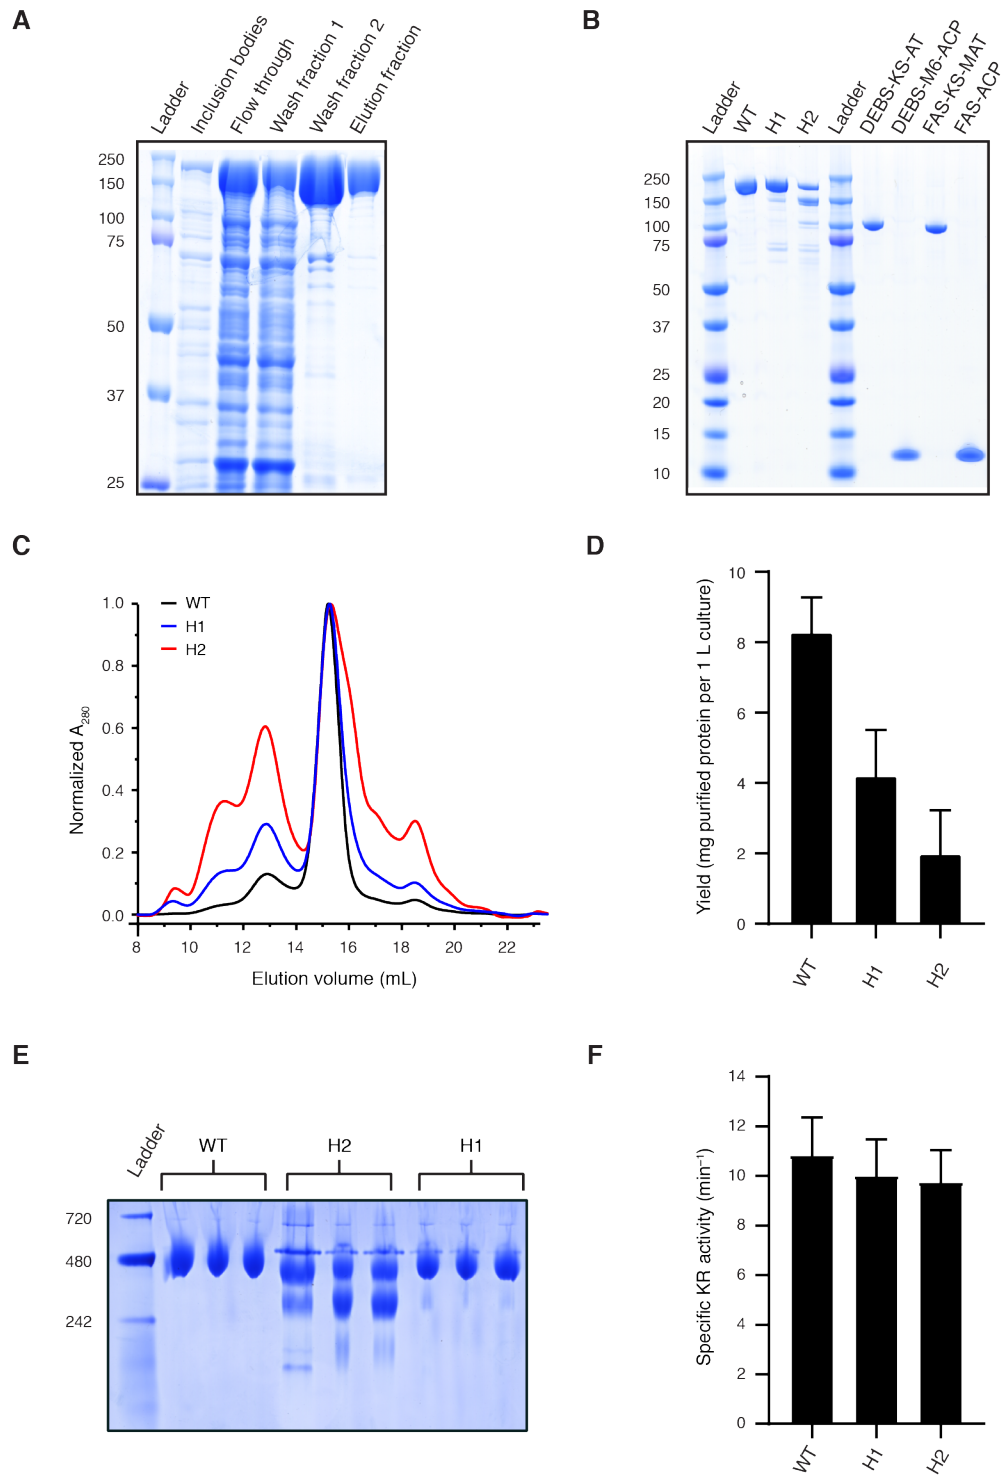

**Supplementary Fig. 13: Purification and quality control of DEBS M6+TE and DEBS/FAS hybrids H1 and H2.**

(A) Purification of DEBS M6+TE (WT) co-expressed with Sfp (SDS-PAGE (7.5 % Tris-glycine, 1 % SDS buffer). After centrifugation, supernatant was purified with Ni-chelating chromatography and the pellet was analyzed for inclusion bodies. DEBS M6+TE has little tendency to aggregate



and was received as a pure protein. (B) Purity of used enzymes after SEC (SDS-PAGE (NuPAGE 4-12 % Bis-Tris, Thermo Fisher)). (C) Oligomeric state of purified WT, **H1** and **H2** analyzed by SEC with absorbance normalized to the highest peak. While the chromatogram of H1 is similar to the WT, the main peak shoulder of H2 indicates the presence of monomers. (D) Comparison of yields after purification (IMAC, SEC) of three different expression cultures of DEBS-M6+TE and variants (n = 3). (E) Native gel electrophoresis (3-12 % Bis-Tris, Thermo Fisher) of DEBS-M6+TE and variants showing dimer for **WT**, **H1**, and **H2** as a mixture of dimer and monomer. Each enzyme is shown in biological triplicates (n = 3) (F) KR specific assay was performed with *trans*-1-decalone indicating 92 % KR-activity for **H1** and 90 % KR-activity for **H2** in biological and technical triplicates (n = 3) compared to the **WT**. Final substrate concentrations in the assay were 0.3  $\mu$ M enzyme, 2 mM *trans*-1-decalone and 60  $\mu$ M NADPH.

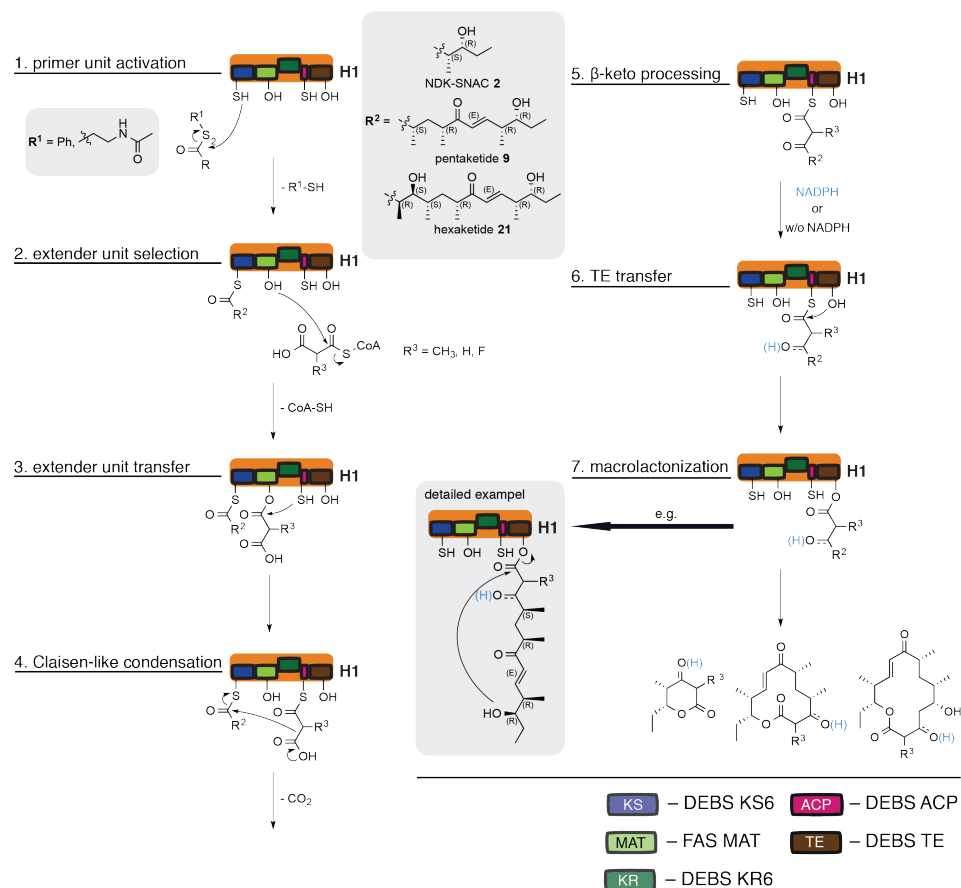

### Supplementary Fig. 14: Proposed mechanism of polyketide formation.

(1) The priming units, *N*-acetylcysteamine-activated diketide, NDK-SNAC (**2**), and thiophenol-activated penta- (**9**) and hexaketide (**21**) bind directly to the active cysteine of the KS domain upon release of *N*-acetylcysteamine and thiophenol, respectively. (2) The extender units malonyl-CoA or derivatives thereof (MM-CoA, F-Mal-CoA and F-MM-CoA) are loaded by the substrate-promiscuous FAS-derived MAT domain upon release of free CoA, (3) and are subsequently transferred to the phosphopantetheine arm of the ACP domain. (4) The ACP-activated malonyl or malonyl-derivative binds to the KS domain for decarboxylative Claisen-like condensation with the priming unit. (5) The  $\beta$ -keto-group of the elongated acyl intermediate, bound to ACP, is then reduced by the KR to form a  $\beta$ -hydroxyl moiety if NADPH is present. (6) Ultimately, the processed acyl intermediate is transferred to the TE domain and (7) released from the hybrid protein by macrolactonization to yield the polyketide products. For clarity, the scheme was simplified to relevant residues and bond-forming steps. **H1** was chosen as an example for the enzyme mediated polyketide formation.

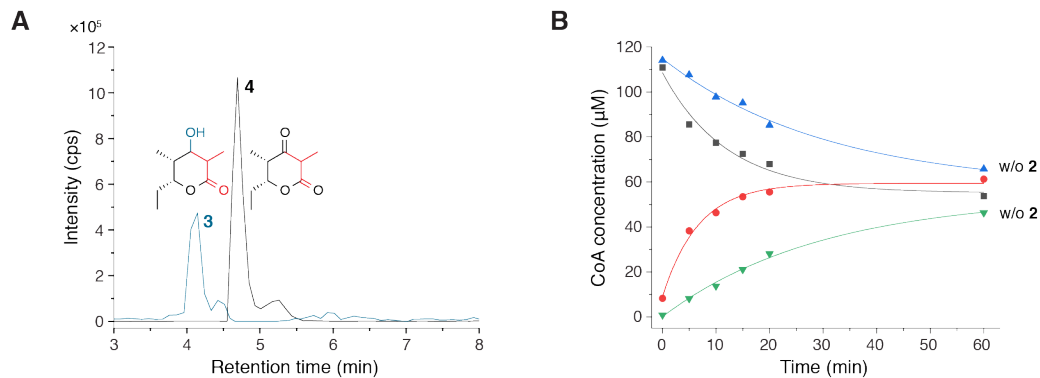

### Supplementary Fig. 15: Functionality of DEBS M6+TE.

(A) Reductive WT-mediated chain extension of diketide-SNAC **2** with MM-CoA monitored by HPLC-MS (EIC: **3**  $[\text{M}+\text{Na}]^+$   $m/z = 194.98$  and **4**  $[\text{M}-\text{H}]^-$   $m/z = 169.12$ ). (B) Non-reductive enzyme-mediated chain extension of diketide-SNAC **2** with MM-CoA monitored by HPLC-UV exemplified by one preparation of **WT**. MMal-CoA consumption (blue and black) and CoA liberation (red and green) was tracked at  $A_{260}$  at defined time points. Enzyme-mediated hydrolysis was measured without **2** (blue and green). CoA concentrations of each time point were determined by using the internal standard HyBu-CoA and fitted with an exponential decay function in OriginPro 8.5. The sum of MMal-CoA and CoA concentrations of each sample was used as quality control and outliers were excluded.



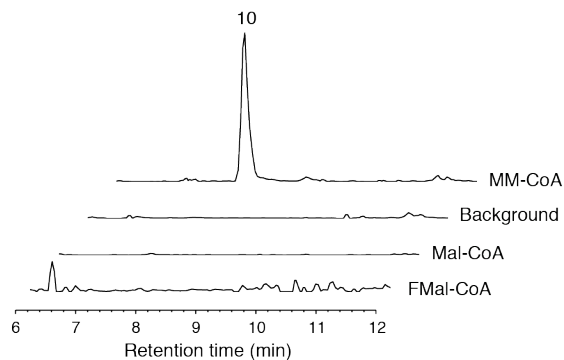

**Supplementary Fig. 17: Extender substrate specificity of DEBS M6+TE (WT).**

Reductive **WT**-mediated chain extension of pentaketide **9** with MM-CoA, Mal-CoA and F-Mal-CoA monitored by HPLC-MS. The background was performed without elongation substrate and only the EIC of the negative control is shown for the mass of compound **10** (elongation product with MM-CoA). EIC of compound **12** (elongation product of Mal-CoA) and **14** (elongation product of F-Mal-CoA) are shown although the masses were not found. Data are normalized with respect to the highest peak of **H1**. (EIC: **10**  $[M+Na]^+$   $m/z = 319.11$ ; **12**  $[M+Na]^+$   $m/z = 305.09$  and **14**  $[M+Na]^+$   $m/z = 323.08$ ).

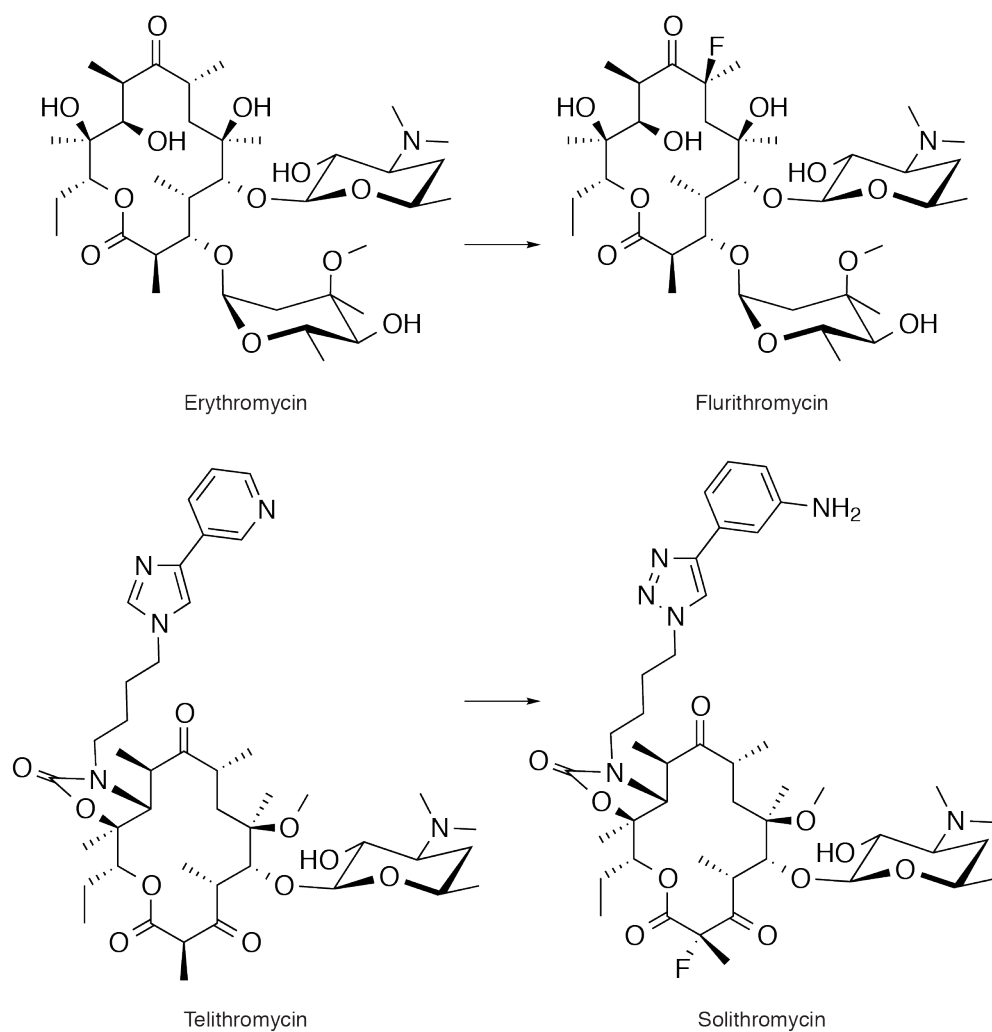

**Supplementary Fig. 18: Chemical structures of erythromycin and derivatives.**

The structures of the natural product erythromycin and the semi-synthetic second generation fluoro-derivative flurithromycin are shown. Telithromycin is also a semi-synthetic erythromycin derivative, which is a FDA-approved third generation antibiotic. Due to side effects of telithromycin the fourth generation antibiotic solithromycin was developed, which is under review for approval.

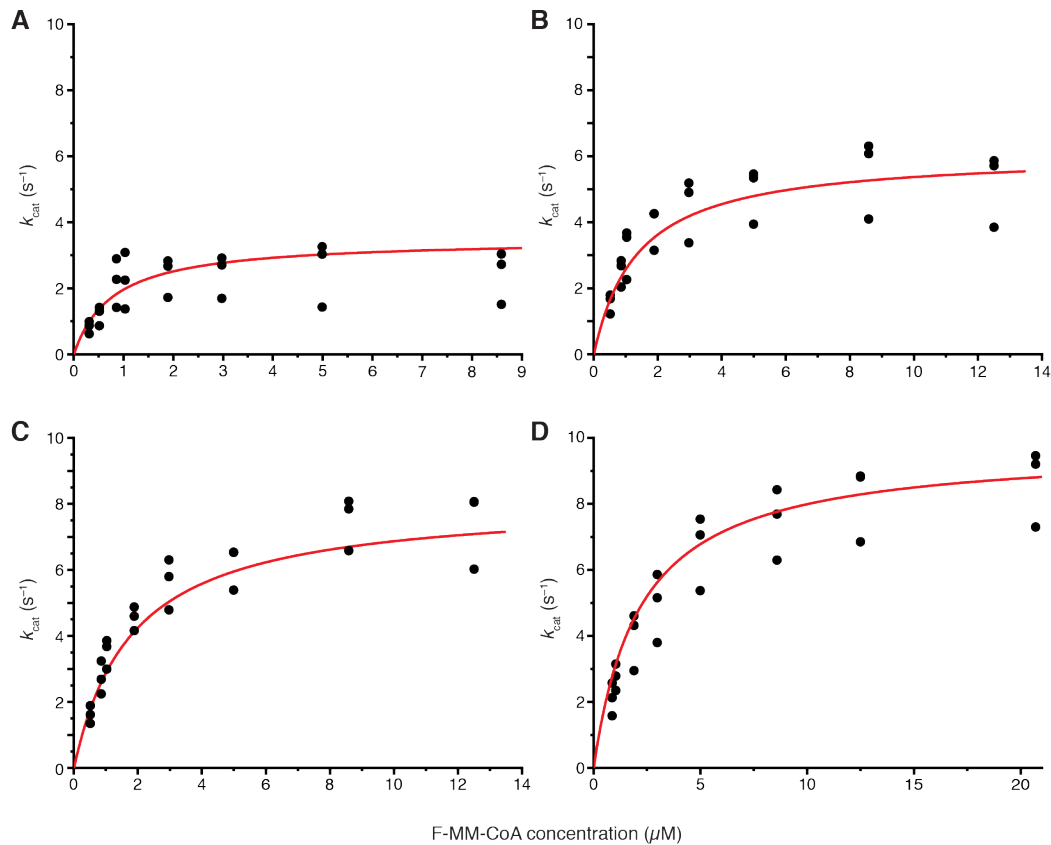

**Supplementary Fig. 19: Global Michaelis-Menten fit of FAS MAT-mediated transacylation of fluoromethylmalonyl-CoA moieties to FAS ACP.**

Initial velocities were plotted against fluoromethylmalonyl-CoA (FMM-CoA) concentrations at four fixed ACP concentrations: (A) 10  $\mu M$ , (B) 25  $\mu M$ , (C) 50  $\mu M$  and 100  $\mu M$  ACP. Data were fit globally with the Michaelis-Menten equation assuming a ping-pong bi-bi mechanism ( $n = 3$ ).

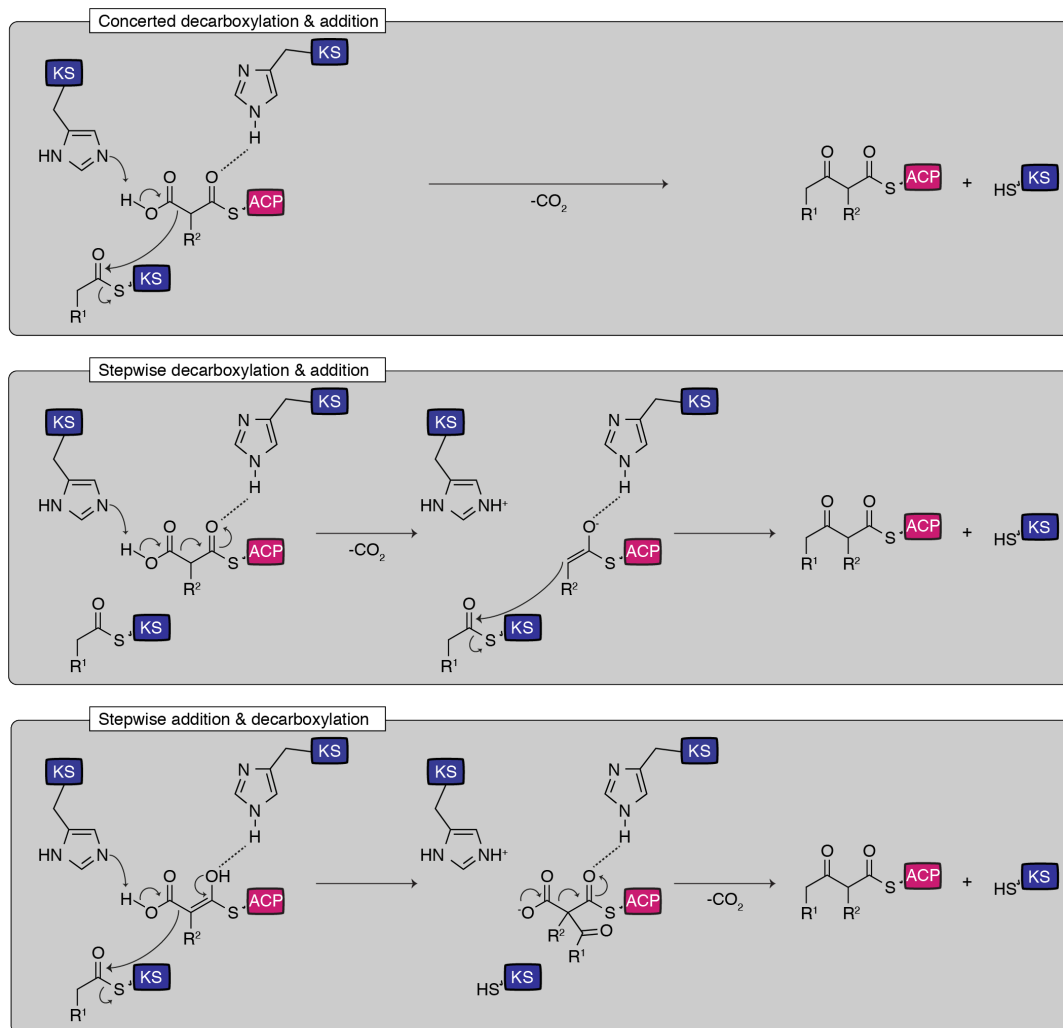

**Supplementary Fig. 20: Possible mechanisms for the KS-catalyzed Claisen condensation.**

After acylation of the KS with the starter substrate or intermediate and acylation of the ACP with the elongation substrate, three distinct mechanisms for the KS-catalyzed chain elongation are possible. In the first mechanism, the decarboxylation and C-C bond formation occur simultaneously. In contrast, two mechanisms are possible where either the decarboxylation or the C-C bond formation precede the other. Adapted from Blaquiére *et al.*<sup>24</sup>

We note that the biosynthesis of compound **18** is indicative of a Claisen condensation reaction that proceeds via decarboxylation to the enolate and nucleophilic C-C bond formation either occurring in concerted manner or in two steps by C-C bond formation succeeding decarboxylation. Demonstrating the direct condensation of disubstituted malonyl-CoA substrates by a conventional KS-domain expands the potential of PKS engineering strategies and enlarges the spectrum of accessible compounds.



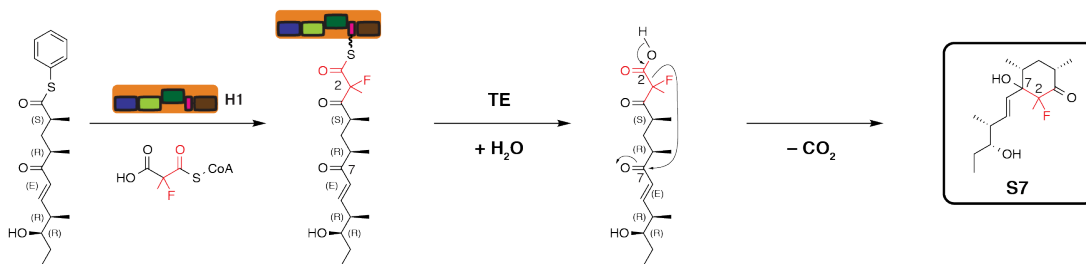

### Supplementary Fig. 21: Postulated mechanism for the production of S7.

We note that elongating the pentaketide with F-MM-CoA in the absence of NADPH led to product **S7**, which is the respective derivative to the previously identified compound **16**. This data indicates that cyclohexanone ring formation of **S7** occurs after TE-catalyzed hydrolysis with subsequent spontaneous decarboxylation and ring closure, similar to the proposed formation of pacificanone, a side product of the rosamicin PKS<sup>25</sup>.

DEBS3 2886

H1 LADHIGQQLD SGTAREASS ALRDGYRQAG VSGRVRSYLD LLAGLSDFRE HFDGSDGFSL  
H1.1 LADHIGQQLS GADT-GAGAG MFRALFRQAV EDDRYGEFLD VLAEASAFRP QFASPEACSE

H1 DL--VDMADG -----PGEVT VICCAGTAAI SGPHEFTRLA GALRGIAPVR AVPQPGYEEG  
H1.1 RLDPVLLAGG PTDRAEGRAV LVGCTGTAAN GGPHEFLRLS TSFQEERDFL AVPLPGYGTG

H1 EP-----LPS SMAAVAAVQA DAVIRTQGDK PFVVAGHSAG ALMAYALATE LL-DRGHPPR  
H1.1 TGTGTALLPA DLDTALDAQA RAILRAAGDA PVVLLGHSGG ALLAHELAFR LERAHGAPPA

H1 GVVLLIDVYPP GHQDAMNAWL EELTATLFDR ETVRMDDTRL TALGAYDRLT GQWRPRETGL  
H1.1 GIVLVDPYPP GHQEPIEVWS RQLGEGLFAG ELEPMSDARL LAMGRYARFL AGPRPGRSSA

H1 PTLIVSAGEP MGPWPDD--S WKPTWPFEDH TVAVPGDHFT MVQEHADAIA RHIDAWLGGG  
H1.1 PVLLVRASEP LGDWQEERGD WRAHWDLPHY VADVPGDHFT MMRDHAPAVA EAVLSWLDAL

H1 -----NSSS VDKLAAA  
H1.1 EGIEGAGKSS VDKLAAA

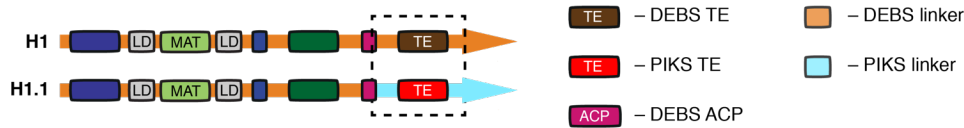

### Supplementary Fig. 22: Design of TE exchange

Sequence alignment of DEBS/FAS hybrids **H1** and **H1.1**, the latter one includes the exchanged PIKS TE. The design of **H1.1** is similar to a previous study by Koch *et al.* and includes the PIKS ACP to TE linker<sup>3</sup>. The sequence alignment is colored according to the color code of the attached domain architecture. Respective DNA sequences are shown in Supplementary Table 6.

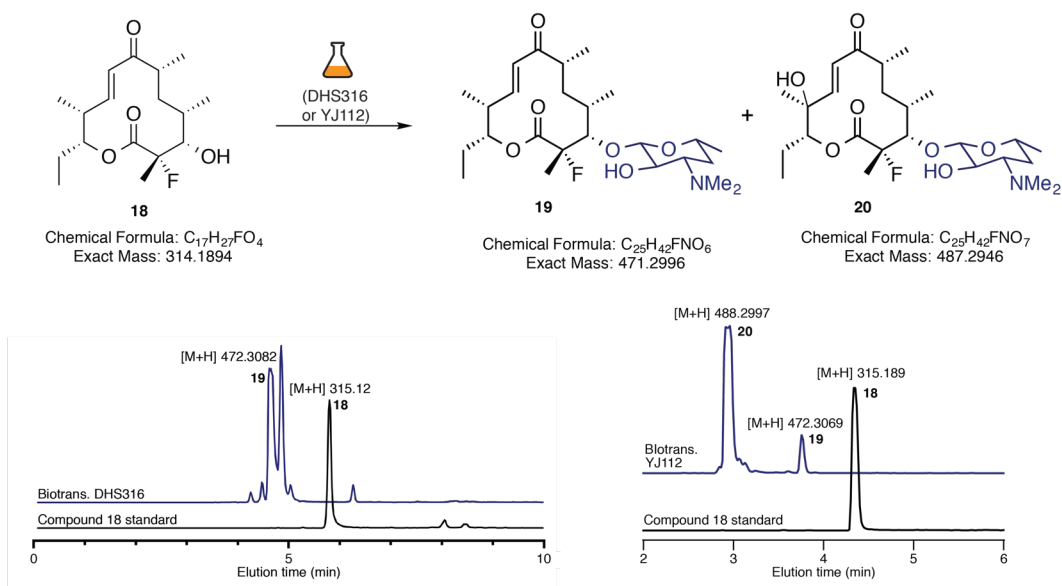

### Supplementary Fig. 23: Biotransformation of compound 18.

Overlaid LC-MS traces of compound **18** and compounds after biotransformation with the *Streptomyces venezuelae* strains DHS316 (left) or YJ112 (right). Mass spectra were taken in positive mode with peaks for biotransformation and subsequent oxidation clearly displayed. According to Jung *et al.*, the strain YJ112 produces next to methymycin also neomethymycin<sup>10</sup>.

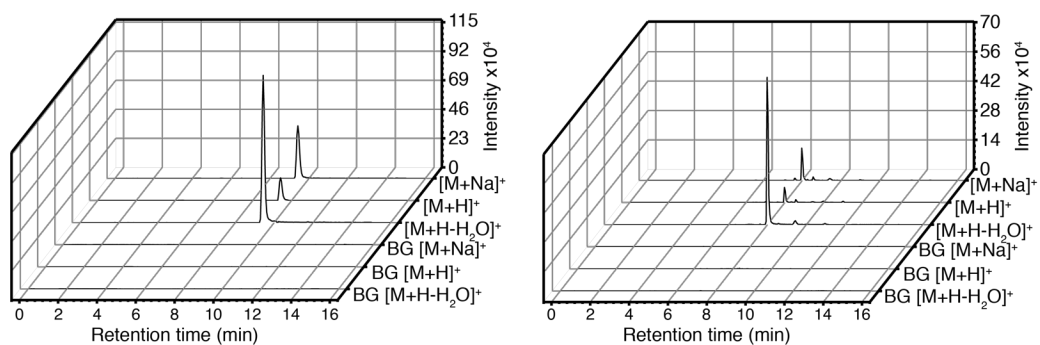

### Supplementary Fig. 24: Conversion of hexaketide **21** to compounds **22-23**

**H1**-mediated chain extension of hexaketide **21** with F-MM-CoA to macrolactone **22** (left, without NADPH) and **23** (right, with NADPH) was monitored by HPLC-HRMS. The background (BG) was performed in the absence of the elongation substrate F-MM-CoA. Found adducts are shown for the enzymatic reactions and background samples. (EIC: **22** [M+Na]<sup>+</sup>  $m/z$  = 393.2041; [M+H]<sup>+</sup>  $m/z$  = 371.2225; [M+H-H<sub>2</sub>O]<sup>+</sup>  $m/z$  = 353.2117; **23** [M+Na]<sup>+</sup>  $m/z$  = 395.2201; [M+H]<sup>+</sup>  $m/z$  = 373.2384; [M+H-H<sub>2</sub>O]<sup>+</sup>  $m/z$  = 355.2275).

## 5. Supplementary Tables:

**Supplementary Table 1: Absolute kinetic parameters for MAT- and DEBS AT6-mediated transfer.**

| AT/MAT  | Substrate | ACP     | $k_{cat}$ [ $s^{-1}$ ] | $K_S$ [ $\mu M$ ] | $K_{ACP}$ [ $\mu M$ ] | $k_{cat}/K_S$ [ $M^{-1}s^{-1}$ ] |
|---------|-----------|---------|------------------------|-------------------|-----------------------|----------------------------------|
| FAS     | F-Mal-CoA | FAS     | $43.28 \pm 3.04$       | $6.3 \pm 0.6$     | $95 \pm 11$           | $6.9 \times 10^6$                |
| FAS     | MM-CoA    | DEBS M6 | $14.08 \pm 0.89$       | $5.2 \pm 0.4$     | $408 \pm 43$          | $2.7 \times 10^6$                |
| DEBS M6 | MM-CoA    | DEBS M6 | $0.29 \pm 0.02$        | $50.8 \pm 5.9$    | $217 \pm 32$          | $5.8 \times 10^3$                |
| FAS     | F-MM-CoA  | FAS     | $12.1 \pm 0.7$         | $2.7 \pm 0.3$     | $24.6 \pm 3.4$        | $4.5 \times 10^6$                |

**Supplementary Table 2: Table of compounds.**

| compound number | chemical formula | turnover rate (min <sup>-1</sup> )                            | calculated mass                                                                                                                                                   | observed mass                                                                                               | observed mass (HR)                                                                                                                                                | retention time [min] |
|-----------------|------------------|---------------------------------------------------------------|-------------------------------------------------------------------------------------------------------------------------------------------------------------------|-------------------------------------------------------------------------------------------------------------|-------------------------------------------------------------------------------------------------------------------------------------------------------------------|----------------------|
| 3               | C9H16O3          | WT = 0.29 ± 0.03<br>H1 = 0.19 ± 0.06<br>H2 = 0.07 ± 0.02      | [M+H] <sup>+</sup> = 173,1178<br>[M+Na] <sup>+</sup> = 195,0997<br>[M-H <sub>2</sub> O+H] <sup>+</sup> = 155,1072<br>[M-H] <sup>+</sup> = 171,1021                | [M+H] <sup>+</sup> = 173,03<br>[M+Na] <sup>+</sup> = 194,98<br>[M-H <sub>2</sub> O+H] <sup>+</sup> = 155,01 | nd                                                                                                                                                                | 4,1                  |
| 4               | C9H14O3          | WT = 1.4 ± 0.4<br>H1 = 0.6 ± 0.1<br>H2 = 0.23 ± 0.02          | [M+H] <sup>+</sup> = 171,1021<br>[M+Na] <sup>+</sup> = 193,0841<br>[M-H <sub>2</sub> O+H] <sup>+</sup> = 153,0916<br>[M-H] <sup>+</sup> = 169,0865                | [M+H] <sup>+</sup> = 171,00<br>[M-H <sub>2</sub> O+H] <sup>+</sup> = 152,96<br>[M-H] <sup>+</sup> = 169,12  | nd                                                                                                                                                                | 4,8                  |
| 5               | C8H14O3          | WT = 0.012 ± 0.003<br>H1 = 0.19 ± 0.02                        | [M+H] <sup>+</sup> = 159,1021<br>[M+Na] <sup>+</sup> = 181,0841<br>[M-H <sub>2</sub> O+H] <sup>+</sup> = 141,0916<br>[M-H] <sup>+</sup> = 157,0865                | [M+Na] <sup>+</sup> = 181,03                                                                                | nd                                                                                                                                                                | 3,3                  |
| 6               | C8H12O3          | WT = 0.0 ± 0.1<br>H1 = 1.2 ± 0.3                              | [M+H] <sup>+</sup> = 157,0865<br>[M+Na] <sup>+</sup> = 179,0684<br>[M-H <sub>2</sub> O+H] <sup>+</sup> = 139,0759<br>[M-H] <sup>+</sup> = 155,0708                | [M-H] <sup>+</sup> = 155,16                                                                                 | nd                                                                                                                                                                | 4,6                  |
| 7               | C8H13FO3         | nd                                                            | [M+H] <sup>+</sup> = 177,0927<br>[M+Na] <sup>+</sup> = 199,0747<br>[M-H <sub>2</sub> O+H] <sup>+</sup> = 159,0822<br>[M-H] <sup>+</sup> = 175,0771                | -                                                                                                           | -                                                                                                                                                                 | -                    |
| 8               | C8H11FO3         | nd                                                            | [M+H] <sup>+</sup> = 175,0771<br>[M+Na] <sup>+</sup> = 197,0590<br>[M-H <sub>2</sub> O+H] <sup>+</sup> = 157,0665<br>[M-H] <sup>+</sup> = 173,0614                | [M-H] <sup>+</sup> = 173,11                                                                                 | nd                                                                                                                                                                | 4,8                  |
| 10              | C17H28O4         | WT = 0.30 ± 0.05<br>H1 = 0.12 ± 0.01<br>H1 = 0.158 ± 0.001*   | [M+H] <sup>+</sup> = 297,2066<br>[M+Na] <sup>+</sup> = 319,1886<br>[M-H <sub>2</sub> O+H] <sup>+</sup> = 279,1960<br>[M-H] <sup>+</sup> = 295,1910                | [M+H] <sup>+</sup> = 297,11<br>[M+Na] <sup>+</sup> = 319,11<br>[M-H <sub>2</sub> O+H] <sup>+</sup> = 279,11 | [M+H] <sup>+</sup> = 297,2056<br>[M+Na] <sup>+</sup> = 319,1876<br>[M-H <sub>2</sub> O+H] <sup>+</sup> = 279,1950                                                 | 8,1                  |
| 11              | C17H26O4         | nd                                                            | [M+H] <sup>+</sup> = 295,1910<br>[M+Na] <sup>+</sup> = 317,1729<br>[M-H <sub>2</sub> O+H] <sup>+</sup> = 277,1804<br>[M-H] <sup>+</sup> = 293,1753                | [M+H] <sup>+</sup> = 295,09<br>[M+Na] <sup>+</sup> = 317,09<br>[M-H <sub>2</sub> O+H] <sup>+</sup> = 277,08 | [M+H] <sup>+</sup> = 295,1904<br>[M+Na] <sup>+</sup> = 317,1720<br>[M-H <sub>2</sub> O+H] <sup>+</sup> = 277,1790                                                 | 9,1                  |
| 12              | C16H26O4         | WT = -0.009 ± 0.004<br>H1 = 0.22 ± 0.03                       | [M+H] <sup>+</sup> = 283,1910<br>[M+Na] <sup>+</sup> = 305,1729<br>[M-H <sub>2</sub> O+H] <sup>+</sup> = 265,1804<br>[M-H] <sup>+</sup> = 281,1753                | [M+Na] <sup>+</sup> = 305,09<br>[M-H <sub>2</sub> O+H] <sup>+</sup> = 256,09                                | [M+H] <sup>+</sup> = 283,1899<br>[M+Na] <sup>+</sup> = 305,1719<br>[M-H <sub>2</sub> O+H] <sup>+</sup> = 265,1796                                                 | 7,5                  |
| 13              | C16H24O4         | nd                                                            | [M+H] <sup>+</sup> = 281,1753<br>[M+Na] <sup>+</sup> = 303,1573<br>[M-H <sub>2</sub> O+H] <sup>+</sup> = 263,1647<br>[M-H] <sup>+</sup> = 279,1597                | [M+H] <sup>+</sup> = 281,07<br>[M+Na] <sup>+</sup> = 303,08<br>[M-H <sub>2</sub> O+H] <sup>+</sup> = 263,08 | [M+H] <sup>+</sup> = 281,1741<br>[M+Na] <sup>+</sup> = 303,1559<br>[M-H <sub>2</sub> O+H] <sup>+</sup> = 263,1637                                                 | 7.2 / 9.5            |
| 14              | C16H25FO4        | WT = 0.003 ± 0.005<br>H1 = 0.056 ± 0.004<br>H1 = 0.04 ± 0.01* | [M+H] <sup>+</sup> = 301,1815<br>[M+Na] <sup>+</sup> = 323,1635<br>[M-H <sub>2</sub> O+H] <sup>+</sup> = 283,1710<br>[M-H] <sup>+</sup> = 299,1659                | [M+H] <sup>+</sup> = 301,10<br>[M+Na] <sup>+</sup> = 323,08<br>[M-H <sub>2</sub> O+H] <sup>+</sup> = 283,08 | [M+H] <sup>+</sup> = 301,1807<br>[M+Na] <sup>+</sup> = 323,1625<br>[M-H <sub>2</sub> O+H] <sup>+</sup> = 283,1700                                                 | 7.7 / 8.0            |
| 15              | C16H23FO4        | nd                                                            | [M+H] <sup>+</sup> = 299,1659<br>[M+Na] <sup>+</sup> = 321,1478<br>[M-H <sub>2</sub> O+H] <sup>+</sup> = 281,1553<br>[M-H] <sup>+</sup> = 297,1502                | [M+H] <sup>+</sup> = 299,08<br>[M+Na] <sup>+</sup> = 321,07<br>[M-H <sub>2</sub> O+H] <sup>+</sup> = 281,06 | [M+H] <sup>+</sup> = 299,1642<br>[M+Na] <sup>+</sup> = 321,1457<br>[M-H <sub>2</sub> O+H] <sup>+</sup> = 281,1537                                                 | 8.4 / 8.9            |
| 16              | C15H25FO3        | nd                                                            | [M+H] <sup>+</sup> = 273,1866<br>[M+Na] <sup>+</sup> = 295,1686<br>[M-H <sub>2</sub> O+H] <sup>+</sup> = 255,1761<br>[M <sub>2</sub> +Na] <sup>+</sup> = 567,3474 | nd                                                                                                          | [M+H] <sup>+</sup> = 273,1859<br>[M+Na] <sup>+</sup> = 295,1677<br>[M-H <sub>2</sub> O+H] <sup>+</sup> = 255,1754<br>[M <sub>2</sub> +Na] <sup>+</sup> = 567,3462 | 7,0                  |
| 18              | C19H31FO5        | H1 = 0.024 ± 0.016<br>H1.1 = 0.17 ± 0.06                      | [M+H] <sup>+</sup> = 315,1972<br>[M+Na] <sup>+</sup> = 337,1791<br>[M-H <sub>2</sub> O+H] <sup>+</sup> = 297,1866<br>[M-H] <sup>+</sup> = 313,1815                | nd                                                                                                          | [M+H] <sup>+</sup> = 315,1961<br>[M+Na] <sup>+</sup> = 337,1781<br>[M-H <sub>2</sub> O+H] <sup>+</sup> = 297,1857                                                 | 7,8                  |
| 19              | C25H42FNO6       | nd                                                            | [M+H] <sup>+</sup> = 472,3075<br>[M+Na] <sup>+</sup> = 494,2894                                                                                                   | nd                                                                                                          | [M+H] <sup>+</sup> = 472,3086<br>[M+Na] <sup>+</sup> = 494,2877                                                                                                   | 4,6                  |
| 20              | C25H42FNO7       | nd                                                            | [M+H] <sup>+</sup> = 488,3024                                                                                                                                     | nd                                                                                                          | [M+H] <sup>+</sup> = 488,2997                                                                                                                                     | 3,0                  |
| 22              | C20H31FO5        | nd                                                            | [M+H] <sup>+</sup> = 371,2234<br>[M+Na] <sup>+</sup> = 393,2054<br>[M-H <sub>2</sub> O+H] <sup>+</sup> = 353,2128                                                 | nd                                                                                                          | [M+H] <sup>+</sup> = 371,2225<br>[M+Na] <sup>+</sup> = 393,2041<br>[M-H <sub>2</sub> O+H] <sup>+</sup> = 353,2117                                                 | 9,4                  |
| 23              | C20H33FO5        | H1 = 0.16 ± 0.03                                              | [M+H] <sup>+</sup> = 373,2391<br>[M+Na] <sup>+</sup> = 395,2210<br>[M-H <sub>2</sub> O+H] <sup>+</sup> = 355,2285                                                 | nd                                                                                                          | [M+H] <sup>+</sup> = 373,2384<br>[M+Na] <sup>+</sup> = 395,2201<br>[M-H <sub>2</sub> O+H] <sup>+</sup> = 355,2275                                                 | 8,0                  |
| S7              | C16H27FO3        | nd                                                            | [M+H] <sup>+</sup> = 287,2023<br>[M+Na] <sup>+</sup> = 309,1842<br>[M-H <sub>2</sub> O+H] <sup>+</sup> = 269,1917<br>[M <sub>2</sub> +Na] <sup>+</sup> = 595,3787 | nd                                                                                                          | [M+H] <sup>+</sup> = 287,2017<br>[M+Na] <sup>+</sup> = 309,1836<br>[M-H <sub>2</sub> O+H] <sup>+</sup> = 269,1913<br>[M <sub>2</sub> +Na] <sup>+</sup> = 595,3779 | 7,0                  |

**Supplementary Table 3: Overview about substrates and constructs used in this study.**

| Substrate       | MM-CoA     | Mal-CoA | F-Mal-CoA | F-MM-CoA |
|-----------------|------------|---------|-----------|----------|
| NDK-SNAC        | WT, H1, H2 | WT, H1  | WT, H1    | -        |
| Pentaketide-SPh | WT, H1     | WT, H1  | WT, H1    | H1, H1.1 |
| Hexaketide-SPh  | -          | -       | -         | H1       |

All constructs (**WT**, **H1**, **H2**) were used to generate the C2-methylated TKLs from NDK-SNAC and MM-CoA. Based on lower turnover rates achieved with **H2** and significantly compromised protein quality, we terminated efforts with this hybrid construct. Consequently, **WT** and **H1** were tested for C2-demethylated and C2-fluorinated TKL production from NDK-SNAC and Mal-CoA or F-Mal-CoA. Data are presented in Fig. 2b and 2c. **WT** and **H1** were also tested for the production of 12-membered macrolactones using the pentaketide starter substrate and MM-CoA, Mal-CoA or F-Mal-CoA as extender unit. Data are presented in Fig. 3. F-MM-CoA as extender substrate in combination with the pentaketide or hexaketide substrate was only tested with **H1**. To improve yields of compound **18**, produced with the pentaketide and F-MM-CoA, we used **H1.1** inspired by a recent report by Koch *et al.*<sup>3</sup>, hybrid construct **H1.1** harbors the PIKS TE instead of the DEBS TE for improved macrolactonization. All reactions described above were tested in the presence and absence of the NADPH cofactor. Proteins colored in red did not produce any product with the used substrates.

**Supplementary Table 4: Used plasmids**

| <b>Construct</b>                | <b>Name</b>                                              | <b>Ref.</b> |
|---------------------------------|----------------------------------------------------------|-------------|
| KS <sup>C161G</sup> -MAT (WT)   | pAR70_StrepI_m(KS(C161G)_MAT)_H8_pET22b                  | 1           |
| FAS ACP                         | pAR352_StrepII_mACP_H8_RBS_SFP_pET22b                    | 1           |
| DEBS ACP6                       | pMJD094_DEBS-M6-H8-ACP_W_pET28a                          | This study  |
| Sfp                             | pAR357_SFP_pCDF-1b                                       | 1           |
| Npt                             | pMJD091_Sppt_pCDF                                        | This study  |
| DEBS KS6 <sup>C1661G</sup> -AT6 | pAR432_DD2_KS6_C1661G_AT6_H6_pET                         | This study  |
| DEBS M6+TE                      | pBL18_DEBS_M6_TE                                         | Khosla Lab  |
| FAS                             | pAR264_StrepI_Not1_mFASm_H8_pET22b                       | 1           |
| <b>H2</b>                       | pMJD076_DEBS_M6_TE_mfASm_LDAT                            | This study  |
| <b>H1</b>                       | pMJD077_DEBS_M6_TE_mfASm_AT                              | This study  |
| <b>H1.1</b>                     | pMSR001_DEBS_M6_mFASm_AT_PIKS_ACP-TE linker_piks_TE      | This study  |
| R606A                           | pAR71_StrepI_m(KS(C161G)_ATmut(R(606A))_H8_pET22b        | 1           |
| M499Q F553Q                     | pAR72_StrepI_m(KS(C161G)_MT(M499Q_F553Q)_H8_pET22b       | This study  |
| K673T                           | pAR91_StrepI_m(KS_K673T_MAT)_H8_pET22b                   | This study  |
| R606E                           | pAR98_StrepI_m(KS(C161G)_ATmut(R(606E))_H8_pET22b        | This study  |
| MTeGate                         | pAR99_StrepI_m(KS(C161G)_MTeGate)_H8_pET22b              | This study  |
| F682S                           | pAR106_StrepI_m(KS(C161G)_MT(F682S))_H8_pET22b           | This study  |
| R606I                           | pAR109_StrepI_m(KS(C161G)_ATmut(R606I)_H8_pET22b         | This study  |
| N738Q                           | pAR122_StrepI_m(KS(C161G)_MT(N738Q))_H8_pET22b           | This study  |
| M499Q                           | pAR123_StrepI_m(KS(C161G)_MT(M499Q))_H8_pET22b           | This study  |
| F553Q                           | pAR124_StrepI_m(KS(C161G)_MT(F553Q))_H8_pET22b           | This study  |
| M499G                           | pAR134_StrepI_m(KS(C161G)_MT(M499G))_H8_pET22b           | This study  |
| L739G                           | pAR135_StrepI_m(KS(C161G)_MT(L739G))_H8_pET22b           | This study  |
| R606A L739W                     | pAR136_StrepI_m(KS(C161G)_ATmut(R606A_L739W))_H8_pET22b  | This study  |
| R606A L739G                     | pAR136B_StrepI_m(KS(C161G)_ATmut(R606A_L739G))_H8_pET22b | This study  |



|             |                                                      |            |
|-------------|------------------------------------------------------|------------|
| V585I L739G | pAR137_StrepI_m(KS(C161G)_MT(V585I_L739G))_H8_pET22b | This study |
| M499A       | pAR139_StrepI_m(KS(C161G)_MT(M499A))_H8_pET22b       | This study |
| M499V       | pAR140_StrepI_m(KS(C161G)_MT(M499V))_H8_pET22b       | This study |
| F553G       | pAR141_StrepI_m(KS(C161G)_MT(F553G))_H8_pET22b       | This study |
| F553A       | pAR142_StrepI_m(KS(C161G)_MT(F553A))_H8_pET22b       | This study |
| F553D       | pAR143_StrepI_m(KS(C161G)_MT(F553D))_H8_pET22b       | This study |
| F553H       | pAR144_StrepI_m(KS(C161G)_MT(F553H))_H8_pET22b       | This study |
| F553N       | pAR145_StrepI_m(KS(C161G)_MT(F553N))_H8_pET22b       | This study |
| F553Y       | pAR146_StrepI_m(KS(C161G)_MT(F553Y))_H8_pET22b       | This study |
| F682S L680V | pAR147_StrepI_m(KS(C161G)_MT(L680Y_F682S))_H8_pET22b | This study |
| L680M       | pAR148_StrepI_m(KS(C161G)_MT(L680M))_H8_pET22b       | This study |
| L680V       | pAR149_StrepI_m(KS(C161G)_MT(L680V))_H8_pET22b       | This study |
| L680H       | pAR150_StrepI_m(KS(C161G)_MT(L680H))_H8_pET22b       | This study |
| S581C       | pAR153_StrepI_m(KS(C161G)_MAT(S581C))_H8_pET22b      | This study |
| S581A       | pAR159_StrepI_m(KS_MAT(S581A))_H8_pET22b             | 1          |
| H683N       | pAR234_StrepI_m(KS(C161G)_MAT(H683N))_H8_pET22b      | This study |
| L680I       | pAR344_StrepI_m(KS(C161G)_MT(L680I))_H8_pET22b       | This study |
| L680I A681P | pAR345_StrepI_m(KS(C161G)_MT(L680I)_A681P)_H8_pET22b | This study |
| L582A       | pAR347_StrepI_m(KS(C161G)_MT(L582A))_H8_pET22b       | This study |
| L582G       | pAR348_StrepI_m(KS(C161G)_MT(L582G))_H8_pET22b       | This study |
| L582M       | pAR349_StrepI_m(KS(C161G)_MT(L582M))_H8_pET22b       | This study |
| L582Q       | pAR351_StrepI_m(KS(C161G)_MT(L582Q))_H8_pET22b       | This study |
| K673AcK     | pDH01_StrepI_m(KS(C161G)_MAT(K673TAG))_H8_pET22b     | This study |
| F682A       | pDH02_StrepI_m(KS(C161G)_MAT(F682A))_H8_pET22b       | This study |
| F682G       | pDH03_StrepI_m(KS(C161G)_MAT(F682G))_H8_pET22b       | This study |
| F682V       | pDH04_StrepI_m(KS(C161G)_MAT(F682V))_H8_pET22b       | This study |

|             |                                                           |            |
|-------------|-----------------------------------------------------------|------------|
| F553H R606A | pDH05_StrepI_m(KS(C161G)_ATmut(R606A)_(F553 H))_H8_pET22b | This study |
| F682S L680V | pDH06_StrepI_m(KS(C161G)_MT(L680V)_(F682S)_H8_pET22b      | This study |
| PMJD106     | pMJD106_DEBS_M6_mFASm_AT_DEBS_ACP-TE linker_piks_TE       | This study |

**Supplementary Table 5: Primers**

| Nr.    | Name                | Sequence (5'3')                            | Template    |
|--------|---------------------|--------------------------------------------|-------------|
| AR26   | AMP_infusion_for    | GAG GAC CGA AGG AGC<br>TAA CC              | pBL18       |
| AR27   | AMP_infusion_rev    | GGT TAG CTC CTT CGG TCC<br>TC              | pBL18       |
| AR719  | LE_H4_for           | CTCGAGCACCACCACCAC                         | pBL18       |
| AR720  | DEBS_AT6_H4_rev     | GTGGTGGTGTCTCGAGGCTGT<br>CGGCGAGCTG        | pBL18       |
| AR721  | DEBS_AT6_C1661G_for | CACGGTGGACACGGCGGGC<br>TCGTCGTCGTTGGTGG    | pBL18       |
| AR722  | DEBS_AT6_C1661G_rev | CGCCGTGTCCACCG                             | pBL18       |
| MJD087 | mFASm_LDAT_fwd      | acacggcaggccc                              | pAR264      |
| MJD088 | mFASm_LDAT_rev      | aggagtcctcgggg                             | pAR264      |
| MJD101 | DEBS_LDAT_fwd       | ccccgaggactcctCTGCCCAACT<br>ACCCGTTTCGAG   | pBL18       |
| MJD102 | DEBS_LDAT_rev       | caggggcctgccgtgtCGGGGGCTC<br>GGCGAT        | pBL18       |
| MJD091 | mFASm_AT_fwd        | aacaagegcccactctg                          | pAR264      |
| MJD092 | mFASm_AT_rev        | tgtgaggtgcacctgc                           | pAR264      |
| MJD105 | DEBS_AT_fwd         | caaggtgcacctcacaGGCGTGGCC<br>GTGGAC        | pBL18       |
| MJD106 | DEBS_AT_rev         | gagtgggcgcttggGGAGGCGGTTC<br>CGGTG         | pBL18       |
| MJD136 | pCDFBB_fwd          | TAATTAACCTAGGCTGCTGC<br>CAC                | pAR357      |
| MJD137 | pCDFBB_rev          | GGTATATCTCCTTATTAAAG<br>TTAAACAAAATTATTTTC | pAR357      |
| MJD138 | Sppt_fwd            | ATAAGGAGATATACCATGAT<br>TGAGAAGTTACTCC     | pET21a_Sppt |
| MJD139 | Sppt_rev            | AGCCTAGGTTAAttaCTCGAG<br>TGCGGCCG          | pET21a_Sppt |
| MJD145 | ACP6_W_for          | CCGCGCGGCAGCCATATGTG<br>GGCGGCCCCG         | pBL18       |
| MJD146 | ACP_W_rev           | ACGAGCTCGAATTCAGAGC<br>TGCTGTCCTATGTGGTCG  | pBL18       |
| MJD164 | DEBS_M6_fwd         | GAGGGGGCGGGCAAGAGCT<br>CCGTCGACAAGC        | pMJD077     |
| MJD175 | DEBS_M6_rev         | GGTGTGCGCCCCGAGAGCT<br>GCTGTCCTATGTGGTC    | pMJD077     |
| MJD177 | PIKS_TE_fwd         | TCCGGGGCCGACACCGGC                         | DSM41110    |
| MJD178 | PIKS_TE_rev         | CTTGCCCCCCCCCTCGATGC<br>C                  | DSM41110    |
| AR168  | mMAT(M499Q)_for     | gttcatctgctcagggCAGggcagcagtg<br>gcgc      | pAR70       |
| AR169  | mMAT(M499Q)_rev     | gcccactgctgccCTGccctgagcagat<br>gaac       | pAR70       |
| AR170  | mMAT(F553Q)_for     | gatgacatgctgccCAGgtgagcctc<br>actgcc       | pAR70       |

|       |                      |                                                   |       |
|-------|----------------------|---------------------------------------------------|-------|
| AR171 | mMAT(F553Q)_rev      | ggcagtgaggctcacCTGggcatgcacga<br>tgtcatc          | pAR70 |
| AR207 | mMAT(K673T)_for      | AGCTCGAGCGCCGCTGC                                 | pAR70 |
| AR208 | mMAT(K673T)_rev      | cgtacctcGGTggcaaacacaccttcttgctt<br>tag           | pAR70 |
| AR223 | mMat_R606E_for       | ctgtgcttgcagcttactggGAAggccagtg<br>catcaaag       | pAR70 |
| AR224 | mMat_R606E_rev       | ctttgatgcactggccTTCccagtaagctgc<br>aagcacag       | pAR70 |
| AR225 | mMT_eGate_for        | GGGCAAAGTGCTTACTGGCC<br>TGACGaagcggagcgtgaagtccag | pAR70 |
| AR226 | mMT_eGate_rev        | AGTAAGCACTTTGCCCGGGC<br>CGACctccagcaccacggcatgc   | pAR70 |
| AR238 | mMAT_F682S_for       | gaacaggaggcctggctTCCcactcctactt<br>catg           | pAR70 |
| AR239 | mMAT_F682S_rev       | catgaagtaggagtgGGAagccaggcctc<br>ctgttc           | pAR70 |
| AR240 | mMAT_N738Q_for       | ccgagtacaatgtcaacCAGctggtgagcc<br>ctgtgc          | pAR70 |
| AR241 | mMAT_N738Q_rev       | gcacagggtcaccagCTGgttgacattgt<br>actcgg           | pAR70 |
| AR244 | mMAT_R606I_for       | ctgtgcttgcagcttactggATTggccagtg<br>catcaaag       | pAR70 |
| AR245 | mMAT_R606I_rev       | ctttgatgcactggccAATccagtaagctgc<br>aagcacag       | pAR70 |
| AR282 | mMAT_M499G_for       | ctcagggGGTggcacgcagtggcgcg                        | pAR70 |
| AR283 | mMAT_M499G_rev       | gtgccACCcctgagcagatgaaccagag                      | pAR70 |
| AR284 | mMAT_L739G/W_for     | tacaatgtcaacaacKGGgtgagccctgtg<br>ctcttc          | pAR70 |
| AR285 | mMAT_L739G/W_rev     | gtgttgacattgtactcggcag                            | pAR70 |
| AR286 | mMAT_V585I_for       | gagagATTgctgtggctatgcagatgg                       | pAR70 |
| AR287 | mMAT_V585I_rev       | cacaggcAATctctccaaggagtgcc                        | pAR70 |
| AR288 | mMAT_M499A/V_for     | ggttcatctgctcagggGYGggcacgcagt<br>ggcgcg          | pAR70 |
| AR289 | mMAT_M499X_rev       | ccctgagcagatgaaccagag                             | pAR70 |
| AR290 | mMAT_F553D/H/N/Y_for | gacatcgtgcatgccNACgtgagcctcact<br>gccatcc         | pAR70 |
| AR291 | mMAT_F553X_rev       | ggcatgcacgatgtcatcaaagg                           | pAR70 |
| AR292 | mMAT_F553A/G_for     | gacatcgtgcatgccGSCgtgagcctcactg<br>ccatcc         | pAR70 |
| AR293 | mMAT_L680Y_S_for     | gtacgaacaggaggcTATgctTCCcact<br>cctacttcatg       | pAR70 |
| AR294 | mMAT_L680X_rev       | gctcctgttctactcc                                  | pAR70 |
| AR295 | mMAT_L680M/V_for     | gtacgaacaggaggcRTGgctttcactcct<br>acttcatgg       | pAR70 |
| AR296 | mMAT_L680H_for       | gtacgaacaggaggcCACgctttcactcc<br>tacttcatgg       | pAR70 |
| AR300 | mMAT_S581C_for       | ggcatcattgggactGcttgggagaggttg<br>ctgtgg          | pAR70 |
| AR301 | mMAT_S581X_rev       | gtgcccaatgatgccgtcag                              | pAR70 |

|       |                      |                                                  |       |
|-------|----------------------|--------------------------------------------------|-------|
| AR310 | mMAT_S581A_for       | ggcatcattgggcacGccttgggagaggtg<br>cctgtgg        | pAR70 |
| AR351 | mMAT_H683X_rev       | gaaagccaggcctcctgttc                             | pAR70 |
| AR421 | mMAT_H683N/D_for     | ggaggcctggcttcRACtctactcatgg<br>aaggaattgcc      | pAR70 |
| AR567 | mMAT_L680I_for       | gtacgaacaggaggcATTgcttccactcct<br>acttcatgg      | pAR70 |
| AR568 | mMAT_L680I_A681P_for | gtacgaacaggaggcATTCCGttccact<br>cctacttcatggaagg | pAR70 |
| AR569 | mMAT_L582X_rev       | ggagtgcceaatgatgccg                              | pAR70 |
| AR570 | mMAT_L582G_A_V_for   | catcattgggcactccGBCggagaggttgc<br>ctgtggc        | pAR70 |
| AR571 | mMAT_L582M_T_for     | catcattgggcactccAYGggagaggttgc<br>ctgtggc        | pAR70 |
| AR572 | mMAT_L582Q_for       | catcattgggcactccCAGggagaggttgc<br>ctgtggc        | pAR70 |
| DH01  | mMAT_K673TAG_for     | caagaaggtgtgtttgccTAGgaggtacga<br>acaggaggcc     | pAR70 |
| DH02  | mMAT_K673X_rev       | ggcaaacacaccttcttcttag                           | pAR70 |
| DH03  | mMAT_F682A_V_G_for   | caggaggcctggctGBCcactcctactcat<br>ggaaggaattg    | pAR70 |
| DH04  | mMAT_F682X_rev       | agccaggcctcctgttcg                               | pAR70 |
| DH05  | mMAT_F553H_for       | gacatcgtgcatgccCACgtgacctcact<br>gcatcc          | pAR70 |
| DH06  | mMAT_L680V_F682S_for | gtacgaacaggaggcGTGgctAGCact<br>cctacttcatggaagg  | pAR70 |

**Supplementary Table 6: DNA Sequences**

| Construct                                 | DNA Sequences                                                                                                                                                                                                                                                                                                                                                                                                                                                                                                                                                                                                                                                                                                                                                                                                                                                                                                                                                                                                                                                                                                                                                                                                                                                                                                                                                                                                                                                                                                                                                                                                                                                                                                                                                                                                                                                                                                                                                                                                                                                                                                                                                                                                                                                                                                                                                                                                                                                                                                                                                                                                                                                                                                                                                                                                                                                                                                                                                                                                                                                                                                                                                                                                                                                                                                                                                                                                                                                                                                                                                    |
|-------------------------------------------|------------------------------------------------------------------------------------------------------------------------------------------------------------------------------------------------------------------------------------------------------------------------------------------------------------------------------------------------------------------------------------------------------------------------------------------------------------------------------------------------------------------------------------------------------------------------------------------------------------------------------------------------------------------------------------------------------------------------------------------------------------------------------------------------------------------------------------------------------------------------------------------------------------------------------------------------------------------------------------------------------------------------------------------------------------------------------------------------------------------------------------------------------------------------------------------------------------------------------------------------------------------------------------------------------------------------------------------------------------------------------------------------------------------------------------------------------------------------------------------------------------------------------------------------------------------------------------------------------------------------------------------------------------------------------------------------------------------------------------------------------------------------------------------------------------------------------------------------------------------------------------------------------------------------------------------------------------------------------------------------------------------------------------------------------------------------------------------------------------------------------------------------------------------------------------------------------------------------------------------------------------------------------------------------------------------------------------------------------------------------------------------------------------------------------------------------------------------------------------------------------------------------------------------------------------------------------------------------------------------------------------------------------------------------------------------------------------------------------------------------------------------------------------------------------------------------------------------------------------------------------------------------------------------------------------------------------------------------------------------------------------------------------------------------------------------------------------------------------------------------------------------------------------------------------------------------------------------------------------------------------------------------------------------------------------------------------------------------------------------------------------------------------------------------------------------------------------------------------------------------------------------------------------------------------------------|
| DEBS ACP6 (pMJD094)                       | <p>ATGGGCAGCAGCCATCATCATCATCACAGCAGCGGCTGGTGCCGCGCGGCAGCCATAT<br/>           GTGGGCGGCCCGGCGGGAGATGACGTGCGCAGGAGTTGCTGGAGTTACGCACTCGCAC<br/>           GTCGCGGGGATCTCTGGGCATTCCAGCCCGGACCGGTCGGGCAGGACCAGCCGTTACCCG<br/>           AGCTCGGCTTCGACTCGCTGACCGCGGTCGGGCTGCGCAACCAGCTCCAGCAGGCCACCCG<br/>           GCTCGCGCTGCCCAGCCCTGGTGTTCGAGCACCCACGGTCCGACAGGTTGGCCGACCACA<br/>           TAGGACAGCAGCTCTGA</p>                                                                                                                                                                                                                                                                                                                                                                                                                                                                                                                                                                                                                                                                                                                                                                                                                                                                                                                                                                                                                                                                                                                                                                                                                                                                                                                                                                                                                                                                                                                                                                                                                                                                                                                                                                                                                                                                                                                                                                                                                                                                                                                                                                                                                                                                                                                                                                                                                                                                                                                                                                                                                                                                                                                                                                                                                                                                                                                                                                                                                                                                                                                                                |
| Npt (pMJD091)                             | <p>ATGATTGAGAAGTTACTCCCGGCCAGTCAGAACGGCAGAGACTTTCGACGATGCGCCTTT<br/>           ATCTGAAATGTTCCCGAAGAGTGGGCGCAGGTTGCAAACGCTGTACCCAAACGCCAACGT<br/>           GAGTTCGGTACTGTACGAGGGTGCCTCGTCTGTCGCTGGCCGAGCTTGGCTTCGCTCCGGC<br/>           ACCATTGCTGCCTGGACCTCATCGTGAGCCGCAAGTGGCCAGATGGGGTTGTGGGCGCGATGA<br/>           CGCACTGCGCGGGATATCGCGCTGTAGCGGTGGCACGCGCCGGAAGTTCCGACAATCGG<br/>           CCTGGATGCCGAACCGAATCTCCCACTAAATGACCCGGGCGTTCCTGACCTGGTGACATTAC<br/>           CGGAAGAACGGGACCAGATCCGGCGCCTCGCCGCCCTTCAACCGGAAGTCTGTTGGGATCG<br/>           CTTGGTCTTTTCCGAAAAGAAAGTGTCTACAAAGCCTGGTTTCCGCTGACGCGCCGTTGGTT<br/>           GGATTTTGAAGAAGCACTGCTGACCTTTGATCCGACCAACGCGACCTTACCGCGCAGTGC<br/>           TGGTGCCGGGCGCGTGGTTGATGGTCTGTAAGTACCGAATTTTCGGGTCGTTGGCTGGTG<br/>           GGTAGCGGTCTGGTCTTACCGCGATTGTGGAAATGGTGTCAAAGCTTGGCGCCGACTCGA<br/>           Gtaa</p>                                                                                                                                                                                                                                                                                                                                                                                                                                                                                                                                                                                                                                                                                                                                                                                                                                                                                                                                                                                                                                                                                                                                                                                                                                                                                                                                                                                                                                                                                                                                                                                                                                                                                                                                                                                                                                                                                                                                                                                                                                                                                                                                                                                                                                                                                                                                                                                                                                                                                                                                                                                                                                                                          |
| DEBS KS6 <sup>C1661G</sup> -AT6<br>pAR432 | <p>ATGGCTAGCACTGACAGCGAGAAGGTGGCGGAGTACCTCCGTCGGGCGACGCTCGACTGC<br/>           GTGCCGCCCGGCAGCGCATCCGCGAGCTGGAATCCGACCCGATCGCGATCGTCCGCATGGC<br/>           CTGCCGCTTCCCGGGCGGCGTGCACAACCCCGGTGAGCTGTGGGAGTTTCATCGTCCGCGGCG<br/>           GAGACGCCGTGACGGAGATGCCACCCAGCCGCGGCTGGGACCTCGACGCGCTGTTCGACCC<br/>           CGACCCGACGCGCCACGGAACCACTACTCGCGACACGGCGCGTTCCTCGACGGGGCCGCC<br/>           GACTTCGACGCGGGCTTCTTCGGGATCTCGCCGCGCGAGGCGTACGGTGGACACGCGCGGGC<br/>           GCGCCAGGTCCTGGAACGACGTTGGGAGCTGTTTCGAGAACGCCGCGATCGACCCGCACTCG<br/>           CTGCGGGGCGAGCGACACCGGCGTCTTCTCGGGCGCCGCTACCAGGGTACGCGCCAGGACG<br/>           CGGTGGTGCCGAGGACAGCGAGGGGCTACCTGCTCACCGGCACTCTCCGCGGTGGTGTCC<br/>           GGCCGGGTCGCTTACGTGCTGGGGTGGAAAGGCCCGCGGTCACGGTGGACACGCGCGGGCT<br/>           CGTCTGCTGGTGGCCTTGCATTCGGCGTGTGGGTGCTGCGTGACGGTACTGCGGTCTTG<br/>           CGGTGGCCGGTGGTGTGTCGGTGTAGCGGGGCCGAGGTTCACCGAGTTCCTCCGCGCAG<br/>           GGCGGCTTGGCCGTGGACGGGCGCTGCAAGGCGTTCCTCCGCGGAGGCCGAGGCTTCGGTT<br/>           CGCCGAGGGCGTCGCGGTGGTCTGCTCCAGCGGTTGTCCGACGCCCGCAGGCGGGTCCGCC<br/>           AGGTGCTCGGCGTGGTTCGCGGGCTCGGCGATCAACCAGGACGGCGCGAGCAACGGTCTCGC<br/>           GGCGCCGAGCGGGCTGCCCCAGCAGCGCTGATCCGCAAGGCGTGGGCGCGTGCGGGGATC<br/>           ACGGGCGCGGATGTGGCCGTGGTGGAGGCGCATGGGACCGGTACGCGGCTGGGCGATCCGG<br/>           TGGAGGCGTCGGCGTTGCTGGCTACTTACGGCAAGTCGCGCGGGTCTGCGGCCCGGTGCTG<br/>           CTGGGTTCCGTTAAGTCAACATCGGTACGCGCAGGGCGGCGTTCGCGCCGCGTGA<br/>           TCAAGGTGGTCTGGGGTTGAACCGCGCCTGGTGCCCGGATGCTCTGCCGCGCGAGCGG<br/>           TCGCCGCTGATCGAATGGTCTCGGGTGGTGTGGAACCTGCCGAGGCGGTGAGCCCGTGGCC<br/>           TCCGGCCGCGGACGGGGTGGCGCCGGGCGGTTGTGTCGGCGTTCCGGGTGAGCGGGACGAAC<br/>           GCGACGTTGATCCTCGCCGAGCCCGGAGCCCGAGCCGCTGCGCGAGCCGATCCCGGATGG<br/>           GCGTGTGGCCGCTGCGAACTCGGTGCCCGTACTGCTGTGCGCCAGGACCGAGACCGCGTTG<br/>           GCAGCGCAGGCGCGGCTCCTGGAGTCCGCAAGTGGACGACTCGGTTCCGTTGACGGCATTGGC<br/>           TTCCGCGCTGGCCACCGGACGCGCCACCTGCCGCGTCTGCGCGGTTGCTGGCAGGCGGACC<br/>           ACGAACAGTCCGCGGGCAGTTGCGAGCGGTGCGCGAGGGCGTTGCGCGGATCCCGGTTGCC<br/>           CACCGGAACCGCCTCCGCGGGCGGCGTGGTTTTTCGTTCTCCAGGTGAGGGTGTCAAGTGGG<br/>           AGGGATGGCCCGGGGCTGCTCTCGGTCCCGCTTTCGCGAGTTCGATCGCCGAGTGGCGAT<br/>           GCGGTGTTGTGCGAGGTGGCCGGGTTCTCGGCCTCCGAAAGTGTGGAGCAGCGTCCGCGACG<br/>           GCCGTGCTGGAGCGGGTGCAGCTGTACAGCCGCTGTTGTTCTCCGTTGATGGTGTGCTG<br/>           CGCGGCTGTGGGGCGCTTTCGGAGTACGCCCTCGGCCGTCATCGGCCATTGCGAGGGCGAG<br/>           ATCGCCGCCGCGGTGGTGGCCGGGTTGTGCTGCTGGAGGACGGCGTGCCTGCTGGCCCT<br/>           GCCGCGGAAGGCGTTGCGTGCCTGGCGGGCAAGGGCGCATGGTCTCGTTGGCGGCTCCC<br/>           GGTAACGCGCCCGCGCTGATCGACCGTGGGAGGACCGGATCTCCGTCGCGGCGGTCA<br/>           ACTCCCGTCTCGGTGCTGGTCTCCGGGATCCGAGGCGCTGGCCGAACCTGCTCGCACGT<br/>           TCGGAGGACGAGGGCGTGCAGCCAAAGACGCTCCCGGTGGACTACGCTCGCACTCCCGCC<br/>           ACCTCGAGGAGATCCGCGAGACGATCTCGCCGACCTCGACGGCATCTCCGCGCGGCGTGC<br/>           CGCCATCCCGCTACTCCACGCTGCACGGCGAACGGCGGACGGCGCGGACATGGGTCCCG<br/>           GGACTGGTACGACAACCTGCGCTCCAGGTGCGCTTCGACGAGGGCGTTCGCGCCGCGTGC<br/>           GCCGACGGTACGCGCACCTTCGTCGAGATGAGCCCGCACCCGGTGTCAACCGCGGCGGTGCA<br/>           GGAGATCGCCCGGACGCGTGGCCATCGGGTCTGCTGACCGCGACACCGCGGAGGAGCAC<br/>           CTGATCGCCGAGCTCGCCCGGGCGCACGTGCACGGCGTGGCCGTGGAGTGGCGGAACGTTCT<br/>           CCGGCGGACCTCCGGTGGCGCTGCCAACTACCCGTTTCGACGAGGGAGCGGTACTCGCTCG<br/>           CGCCGAGGTTGTCGACAGCTCGCCGACAGCCTCGAGCACACCACCACCACCCTGA</p> |
| DEBS M6+TE (pBL18)                        | <p>ATGGCTAGCACTGACAGCGAGAAGGTGGCGGAGTACCTCCGTCGGGCGACGCTCGACTGC<br/>           GTGCCGCCCGGCAGCGCATCCGCGAGCTGGAATCCGACCCGATCGCGATCGTCCGCATGGC<br/>           CTGCCGCTTCCCGGGCGGCGTGCACAACCCCGGTGAGCTGTGGGAGTTTCATCGTCCGCGGCG</p>                                                                                                                                                                                                                                                                                                                                                                                                                                                                                                                                                                                                                                                                                                                                                                                                                                                                                                                                                                                                                                                                                                                                                                                                                                                                                                                                                                                                                                                                                                                                                                                                                                                                                                                                                                                                                                                                                                                                                                                                                                                                                                                                                                                                                                                                                                                                                                                                                                                                                                                                                                                                                                                                                                                                                                                                                                                                                                                                                                                                                                                                                                                                                                                                                                                                                                                                  |

GAGACGCCGTGACGGAGATGCCACCGACCGGGCTGGGACCTCGACGCGCTGTTCCGACCC  
CGACCCGCAGCGCCACGGAACAGCTACTCGCGACACGGCGGTTCTCGACGGGGCCGCC  
GACTTCGACGCGGCTTCTTCGGGATCTCGCCGCGGAGGCGCTGGCGATGGACCCGCAGCA  
GCGCCAGGTCCTGAAACGACGCTGGGAGCTGTTTCGAGAACGCCGGCATCGACCCGACTCG  
CTGCGGGGACGACACCGGCTTCTTCGGCGCCGCTACCAGGGCTACGGCCAGGACG  
CGGTGGTGCCGAGGACAGCGAGGGCTACCTGCTCACCGGCAACTCCTCCGCGTGGTGTCC  
GGCCGGTCCCTACGTGCTGGGGCTGGAAGGCCCGCGGTACGGTGGACACGGCGTGT  
CGTCTCGTTGGTGGCTTGCATTCGGCGTGTGGGTCTGCGTGACGGGTGACTGCGGCTTG  
CGGTGGCCGGTGGTGTGCGGTGATGGCGGGCCCGGAGGTGTTACCCGAGTTCCTCCCGCCAG  
GGCGCTTGGCCGTGGACGGGCGCTGCAAGGCGTTCCTCCGCGGAGGCCGACGGCTTCGGTT  
CGCCGAGGGCGTCCGGTGGTCTGCTCCAGCGTGTTCGACGCCCGCAGGGCGGGTCCG  
AGGTGCTCGGCGTGGTCCGCGGCTCGGCGATCAACCAGGACGGCGCGAGCAACGGTCTCG  
GGCGCCGAGCGGCGTCCGCCAGCAGCGCTGATCCGCAAGGCGTGGGCGCGTGCGGGGATC  
ACGGCGCGGATGTGGCCGTGGTGGAGGCGCATGGGACCGGTACGCGGCTGGGCGATCCGG  
TGGAGGCGTCCGGCTTGTGGTACTTACGGCAAGTCGCGCGGGTCTCGGGCCCGGTGCTG  
CTGGGTTGGTGAAGTCGAACATCGGTCACGCGCAGGCGCGGCTGCGGGCCCGGTGCTG  
TCAAAGTGGTCTGGGGTTGAACCGCGGCTGGTGGCCGATGCTGTGCCGCGAGCGG  
TCGCCGCTGATCGAATGGTCTCGGGTGGTGTGAACTTGGCGAGGCCGTGAGCCCGTGGCC  
TCCGGCCGCGGACGGGGTGCGCCGGGCGGTGTGTGGCGTTCGGGGTGAAGCGGACGAAC  
GCGCACGTGATCATCGCCGAGCCCCGAGCCCGAGCCGCTGCCGAACCCGGACCGGTGG  
GCGTGTGGCCGCTGCGAACTCGGTGCCGTAAGTCTGCGGCAAGGCGTTCGCGGCGGCTG  
GCAGCGCAGGCGGGCTCCTGGAGTCCGACGTGGACGACTCGGTTCCGTTGACGGCATTGGC  
TTCCGCGCTGGCCACCGGACGCGCCACCTGCCGCGTCTGTCGGCGTGTGTCAGGCGACC  
ACGAACAGTCCCGGGCAGTTGCGAGCGGTGCGCGAGGGCGTTGCGGCTCCCGGTGCCAC  
CACCGAACCCTCCGCGGCGGCTGGTTTTCTGCTTCCAGGTCAGGTTCAAGTGGG  
AGGGCATGGCCCGGGGCTTGTCTCGGTCCCGTCTTCGCCGAGTCGATCGCCGAGTGCAT  
GCGTGTGTCGAGGTGGCCGGTTCGCGCCTCCGAAGTGTGGAGCAGCGTCCGACGCG  
GCCGTGCTGGAGCGGGTGCAGCTGTACAGCCGGTGTGTTCTCCGTTATGGTGTGCGTGG  
CGCGGTGTGGGGCGCTTGGCGAGTACGCCCTCGGCCGTCATCGGCAATCGGACCGCGGAG  
ATCGCCCGCGGTGGTGGCCGGGTTGTGCTGAGGAGCAGCGTGCCTGCGTGGCCGCTG  
GCGCGAAGGCGTGTGCTGCGTGGCGGCAAGGGCGCATGGTCTCGTTGGCGGCTCC  
GGTGAACGCGCCCGCGCTGATCGACCGTGGGAGGACCGGATCTCCGTCGCGGGCGTCA  
ACTCCCCGTCCTGGTCTGGTCTCCGGCGATCCGGAGGCGTGGCCGAACCTGTCGACG  
TGCAGGACGAGGGCGTGCAGCCGCAAGACGCTCCCGGTGACTACGCTCGACCTCCCGCC  
ACGTCGAGGAGATCCCGGAGACGATCCTCGCCGACCTCGACGGCATCTCCGCGGGCGTGC  
CGCCATCCCGCTACTCCACGCTGCACGGCAACGGCGCGACGGCGCGACATGGGTCCGC  
GGTACTGGTACGACAACCTGCGCTCCAGGTGCGCTTCGACGAGGCGGTCTCGGCCCGCGT  
GCCGACGGTACGCAACCTTCGTCGAGATGAGCCCGCACCCGCTGCTACCCGCGCGGCGCA  
GGAGATCGCCGCGGACGCCGTGGCCATCGGGTCTGCTGCACCGGACACCGCGGAGGAGCAC  
CTGATCGCCGAGTCTGCCCGGGCGACGTCACGGCGTGGCCGTGGACTGGCGGAACGTT  
CCCGGGCACCTCCGGTGGCGTGGCCAACTACCCGTTTCGAGCCCCAGGGTACTGGCTCG  
CGCCGAGGTGTCCGACAGTCTCGCCGACAGCCGCTACCCGCTGACTGGCGACCGTGGC  
CACCACGCGGTGGACCTGGAAGGGGGTTCCTGGTCCACGGGTCCGACCCGGAGTCTGCTG  
ACCAGCGAGTCGAGAAGCCGGAGGCCGCTCGTGCCGTCGCTCGGCCGACCGCGAAG  
CGCTCGCGGGCCCTGCGGGAGGTGCCGGGCGAGGTGCGCGGCGTGTCTCGGTCCACAC  
CGGCGCCGAACGCACCTGCCCCTGCACAGTCTGGTGGAGGCGGCGTTCGCGGGCCCG  
CTTGGTGGTACACCGAGCGGCTGCGCTCGGGGAGTCCGAGCCGCTGATCCCGAGC  
AGGCGATGGTGTGGGTCTCGGGCGCTCATGGGCTGGAGACCCGGAACGGTGGGGCGG  
TCTGGTGGACTGCCCGCCGAACCCGCGCGGGGGACGGCGAGGCGTTCGTCGCTGCCTCG  
GCGCGACGGCCACGAGGACAGGTGCGGATCCGTGACCACGCCCGTACGGCCCGCGCT  
CGTCCGCGCCCGCTGGGACCCGCGAGTTCGAGTGGGAGCCGCGGGGACCGCGGCGTGGT  
ACCGGCGGACCCGTCGCTCGGGCGCCACGTCGCCCCGACCTCGCCAGGTGCGGGGTGG  
AGGACCTGGTGTGGTACGAGGCGCGGCTCGACGCTCCCGCGCGGCGGAGCTGGAAGC  
CGAAGTGGTCCCTCGGGCGAAGACGACCATACCCGCTGCGACGTGGCCGACCGCGAG  
CAGTCTCCAAGTGTGGAAGAAGTGCAGCGGGCAGGACGTTCCGGTCCGAGACCGTCTGTC  
ACACCGCGGGGTGCCGAATCGAGGCGCTGCACGAGATCGGCGAGTGGAGTCTGGTCTG  
CGCGCGAAGGTGACGGGGCCCGGCTGCTCGACGAGTGTGCCCGGACCGGAGACCTTC  
GTCCTGTTCTCGTCCGAGCGGGGTGTGGGGCAGTGCGAACCTCGGCGCCTACTCCGCGGC  
CAACGCTACCTCGACGCGCTGGCCACCGCCCGCTGCGGAAGGCGTGGCGGCGAGTGGC  
GTCGCGTGGGGCGCTGGGCGGGCGAGGGCATGGCCACCGGACCTCGAGGGGCTCACCC  
GGCGGGCTGCGCCGATGGCGCCGAGCGCGGATCCGCGGCTGCACAGGCGTGGAC  
CAACGGCGACAGTGGTTCGATCGCCGACGTCGACTGGGAGCGCTTCGCGGTTCGGTTC  
CCGCCCGCGCGCTCCGCTGCTGGACGAGCTCGTACGCGGCGGTGGGGGCGTCCCC  
GCGGTGACAGCGGCCCCGGCGGGGAGATGACGTCGAGGAGTTCGAGGTTACGCACT  
CGCACGTCGCGGCGATCCTCGGGCATTCCAGCCCGGACGCGGTGGGGCAGGACAGCCGTT  
CACCGAGCTCGGCTTCGACTCGCTGACCGCGGTGGGCTGCGCAACAGCTCCAGCAGGCCA  
CCGGGCTCGCGTGGCCGACCTGGTGTTCGAGCACCCACGGTCCGAGGTTGGCCGAC  
CACATAGGACAGGCTCGACAGCGGGACTCCCGCCGGGAAGCGAGGCTTCGCG  
ACGGCTACCGGACGGCGGGCGTGTGGGCAAGGTCCGGTCTACCTCGACCTGTCGGGG  
GCTGTGCGACTCCGCGAGCACTTCGACGGCTCCGACGGGTTCTCCCTCGATCTCGTGACA

|                     |                                                                                                                                                                                                                                                                                                                                                                                                                                                                                                                                                                                                                                                                                                                                                                                                                                                                                                                                                                                                                                                                                                                                                                                                                                                                                                                                                                                                                                                                                                                                                                                                                                                                                                                                                                                                                                                                                                                                                                                                                                                                                                                                                                                                                                                                                                                                                                                                                                                                                                                                                                                                                                                                                                                                                                                                                                                                                                                                                                                                                                                                                                                                                                                                                                                                                                                                                                                                                                                                                                                                                                                                                                                                                                                                                                                                                                                                                                                                                                                                                                                                                                                                                                                                                                                                                                                                                                                                 |
|---------------------|-------------------------------------------------------------------------------------------------------------------------------------------------------------------------------------------------------------------------------------------------------------------------------------------------------------------------------------------------------------------------------------------------------------------------------------------------------------------------------------------------------------------------------------------------------------------------------------------------------------------------------------------------------------------------------------------------------------------------------------------------------------------------------------------------------------------------------------------------------------------------------------------------------------------------------------------------------------------------------------------------------------------------------------------------------------------------------------------------------------------------------------------------------------------------------------------------------------------------------------------------------------------------------------------------------------------------------------------------------------------------------------------------------------------------------------------------------------------------------------------------------------------------------------------------------------------------------------------------------------------------------------------------------------------------------------------------------------------------------------------------------------------------------------------------------------------------------------------------------------------------------------------------------------------------------------------------------------------------------------------------------------------------------------------------------------------------------------------------------------------------------------------------------------------------------------------------------------------------------------------------------------------------------------------------------------------------------------------------------------------------------------------------------------------------------------------------------------------------------------------------------------------------------------------------------------------------------------------------------------------------------------------------------------------------------------------------------------------------------------------------------------------------------------------------------------------------------------------------------------------------------------------------------------------------------------------------------------------------------------------------------------------------------------------------------------------------------------------------------------------------------------------------------------------------------------------------------------------------------------------------------------------------------------------------------------------------------------------------------------------------------------------------------------------------------------------------------------------------------------------------------------------------------------------------------------------------------------------------------------------------------------------------------------------------------------------------------------------------------------------------------------------------------------------------------------------------------------------------------------------------------------------------------------------------------------------------------------------------------------------------------------------------------------------------------------------------------------------------------------------------------------------------------------------------------------------------------------------------------------------------------------------------------------------------------------------------------------------------------------------------------------------------|
|                     | <p>TGGCCGACGGTCCCAGAGAGGTCACGGTGATCTGCTGCGCGGGAACGGCGGCGATCTCCGG<br/> TCCGCACGAGTTCACCCGGCTGCGCGGGGCGCTGCGCGGAATCGCTCCGGTTCGGGGCGGTG<br/> CCCAGCCCGGCTACGAGGAGGGCGAACCTCTGCCGTCGTCGATGGCGGGTGGCGGGCGGT<br/> GCAGGCCGATGCGGTCATCAGGACACAGGGGACAAGCCGTTCTGTTGGCCGGTCACTCC<br/> GCGGGGGCACTGATGGCCTACGCGCTGGCGACCGAACTGCTCGATCGCGGGCACCCGCCAC<br/> GCGGTGTCGTCCTGATCGACGCTACCCGCCGGTCAACCAGGACGCGATGAACGCCTGGCTG<br/> GAGGAGCTGACCGCCACGCTGTTCCGACCGGAGACGGTGGGATGGACGACACCAGGCTCA<br/> CCGCCCTGGGCGCTACGACCGCCTCACCGGTCAGTGGCGACCCCGGAAACCCGGCTGCC<br/> GACGCTGCTGGTCAGCGCGGGGAGCCGATGGGTCCGTGGCCGACGACAGCTGGAAGCCG<br/> ACGTGGCCCTTCGAGCAGACACCGTTCGCCGTCGCCGGCGACCACTTCACGATGGTGACGA<br/> ACACGCCGACGCGATCGCGGGCACATCGACGCGCTGGCTGGGCGGAGGAAATTCGAGCTCC<br/> GTCGACAAGCTTGGCGCCGACTCGAGCACACCACCACCACCCTGA</p>                                                                                                                                                                                                                                                                                                                                                                                                                                                                                                                                                                                                                                                                                                                                                                                                                                                                                                                                                                                                                                                                                                                                                                                                                                                                                                                                                                                                                                                                                                                                                                                                                                                                                                                                                                                                                                                                                                                                                                                                                                                                                                                                                                                                                                                                                                                                                                                                                                                                                                                                                                                                                                                                                                                                                                                                                                                                                                                                                                                                                                                                                                                                                                                                                                                                                                                                                                                                                                                                                                                                                                                  |
| <p>H2 (pMJD076)</p> | <p>ATGGCTAGCACTGACAGCGAGAAGGTGGCGGAGTACCTCCGTCGGGCGACGCTCGACCTGC<br/> GTGCCGCCCGGCAGCGCATCCGCGAGCTGGAATCCGACCCGATCGCGATCGTCCGGCATGGC<br/> CTGCCGCTTCCCCGGCGGCGTGCACAACCCCGGTGAGCTGTGGGAGTTCATCGTCCGGCGCG<br/> GAGACGCCGTGACGGAGATGCCACCGACCGCGGCTGGGACCTCGACGCGCTGTTCCGACCC<br/> CGACCCGACGCGCCACGGAACAGCTACTCGCGACACGGCGGGTCTCTCGACCCGGCGCC<br/> GACTTCGACGCGGCGTCTTCCGGATCTCGCCGCGGAGGGCGTGGCGATGGACCCGCAGCA<br/> GCGCCAGGTCTGGAACGACGCTGGGAGCTGTTCGAGAACCGCGCATCGACCCGCACTCG<br/> CTGCGGGGCGAGCAGACACCGGCGTCTTCTCGGCGCCGCTACCAAGGCTACCGCCAGGACG<br/> CGTGTGGTCCCGAGGACAGCGAGGGTACTGCTCACCGGCAACTCTCCGCGGCTGGTGTCC<br/> GGCCGGGTGCGCTACGTGCTGGGGTGGAAAGGCCCGCGGTACCGGTGGACACGGCGTGT<br/> CGTTCGTTGGTGGCCTTGCAATTCGGCGTGTGGGTGCTGCGTGACGGTGACTGCGGTCTG<br/> CGGTGGCCGGTGGTGTGTCGGTGTGGCGGGCCCGAGGTGTTCACCGAGTTCCTCCCGCCAG<br/> GGCGCTTGGCCGTGGACGGGCGCTGCAAGGCGTCTCCGCGGAGCCGACCGTCTCGGTTT<br/> CGCCGAGGGCGTCCGGTGGTCTGCTCCAGCGGTTGTCCGACGCCCGAGGGCGGGTCCGC<br/> AGGTGCTCGGCGTGGTCCGGGCTCGCGGATCAACCAGGACGGCGCGAGCAACGGTCTCGC<br/> GGCGCCGAGCGGCGTCCGCCAGCAGCGCGTGTATCCGCAAGGCGTGGGCGCGTCCGGGGATC<br/> ACGGGCGCGGATGTGGCGTGGTGGAGGCGCATGGGACCGGTACGCGGCTGGGCGATCCGG<br/> TGGAGGCGTCCGGCTTGTGGCTACTTACGGCAAGTCCGCGCGGGTCTCGACCCCGGTGCTG<br/> CTGGTTCCGGTGAAGTCGAACATCGGTACGCGCAGGCGGCCGCGGGTGTGCGGGCGTGA<br/> TCAAGGTGGTCTGGGGTTGAACCGCGGCTGGTCCCGCGATGCTGTCGCGCGGAGCGG<br/> TCGCGCTGATCGAATGGTCTCGGGTGGTGTGGAACCTGCCGAGCCGCTGAGCCCGTGGCC<br/> TCCGCGCGGACGCGGGTGCAGCGGGCGGTGTGTCGCGGTTTCGGGGTGGAGCGGACGAAC<br/> GCGCACGTGATCATCGCCGAGCCCCGacacggcaggccccctgcgccactgcacacgctgccccctcccafttgcgcagc<br/> cagtgagcagcaccttagaggcagtgaggacctgctggaacaggccgccagcacagccaggacctggcctttgagcatgctcaatgacatfgc<br/> gcaacccctacagcagccatccccctcagggttacactgtctaggtgtgaggccctgtccaagaagtgcaagaatgtccaccaacaagc<br/> actctgttcatctcagggatggcagcagcagtgccgctggatggggctgagcctcatgctgacagcttccgtgagctatctgctgctccg<br/> gagctgtgaagcccttggagtgaaagtgcagatgctgttgagcacagatgagcgcacctttgatgacatgctgcttctgagtggaagga<br/> catccagattccccctacgacctactactctgtggactgaaacctgacggcatcattgggcaactctgggagaggtgctgtgctatgacatg<br/> gctgtctccccagagagagctgtgctgacgcttactggcagggccagtgcatcaaatgcccactccccctggatccatggcagctgtggtttg<br/> tctgggaggaatgaaacagcgtgccccctggcgtggtgctgctgccacaactctgagacacctgaccatctggacctcaggtcgatg<br/> aatgaattgtggagcagctaaagcaagaaggtgttggcgaagggtagcaaacaggagccctggttccactcctactctgagtggaaggaatgccc<br/> ccacattgctgaggtctcaagaaggtgatccgggaaccagggccgctgctggctgatggtcagcactctatccctgagccagtgccagagc<br/> agcctggccgacatcttcccgagtaaatgcaacaacctggtgagccctgctctccaggaagcactgtggcacaatccctgagcatgctggtg<br/> tgctggagattgccccacgcaactgtgagggctgctgaaagcagggcgtgaggtccagctgaccatcaltccctgatgaagggatcaaaaga<br/> taactggagttcttccaccaacctggcaaggtgcacctcaaggcatcaatgcaacctaacctgcttccactcctgagtgaggtccgctcccc<br/> gggactcctCTGCCAACTACCCGTTCCGAGCCCCAGCGGTAAGTGGCTCGCGCCGGAGGTGTCCGA<br/> CCAGCTCGCCGACAGCCGCTACCGGTCGACTGGCGACCGCTGGCCACCACGCCGGTGGAC<br/> CTGGAAGGCGGCTTCTGGTCCACGGGTCCGCACCGGAGTCCGTCGACAGCGAGTCCGAGA<br/> AGGCCGGAGGCGCGTCTGTCGCGGTCGCTCGGCGACCGGAGCGAAGCGACTCGCGGGCCCT<br/> GCGGGAGGTGCCGGGCGAGGTCGCGGGCGTGTCTCGGTCCACACCGGCGCCGCAACGCAC<br/> CTCGCCCTGCACAGTTCGCTGGGTGAGGCGCGGCTGCGGGCCCCGCTCGGCTGGTACCAG<br/> CCGAGCGGTGCGGCTCGGGGAGTCCGAGCCGGTGCATCCCGAGCAGCGGATGGTGTGGGGT<br/> CTCGGGCGGTCATGGGCTGGAGACCCCGAACCGTGGGGGCTGTTGGTGGACTCCGCCG<br/> CCGAACCCGCGCCGGGGACGGCGAGGCGTTCGTCGCTGCCTCGGCGGGACGGCCACGA<br/> GGACCAGGTTCGCGATCCGTGACCACGCCGCTACGGCCGCCGCTCGTCCGCGCCCCGCTGG<br/> GCACCCGCGAGTTCGAGCTGGGAGCCGGCGGACGGCGCTGGTACCCGCGGCGACCGGTGC<br/> GCTCGGCGGCCACGTCGCCGCCACTCGCCAGGTGCGGGGTGGAGGACTGGTGTCTGGT<br/> AGCAGGCGCGGCTCGACGCTTCCCGGGCGGCGGAGCTGGAAGCGGAACTGGTTCGCCCTCG<br/> GCGGAAGACGACCATCACCCGCTGCGACGTGGCCGACCGGAGCAGCTCTCAAGCTGCT<br/> GGAAGAATGCGCGGGCAGGACGTCGCGGTGCGGACCGTGCATCACACCCCGGGGTGCC<br/> GAATCGAGGCGCTGCACGAGATCGGCGAGCTGGAGTGGTCTCGCGCGGCAAGGTGACCG<br/> GGGCCCGGCTGCTCGACGAGTGTGCGCCGACGCGGAGACCTTCGCTGCTGTTCTCGTCCGGA<br/> GCGGGGGTGTGGGCGAGTGCGAACCTCGGCGCTACTCCGCGGCAACGCCTACCTCGACG<br/> CGTGGCCACCGCCGCTGCGGAAGGCCGTGCGGCGACGTCGCTCGCTGTTCTGTCGCTG<br/> GGCGGGCGAGGGCATGGCCACCGGCGACCTCGAGGGGCTACCCCGGCGGCGCTGCGCCCG<br/> ATGGCGCCGAGCGCGGATCCGCGCGCTGCACCAAGGCGTGGACCAACCGCGACACGTCGCG<br/> TTTCATCGCCGACGTCGACTGGGAGCGCTTCGCGGTGCGGTTACCCGCGCCCGGCGGCT<br/> CCGCTGCTGGACGAGCTCGTACCGCGGCGGTGGGGGCCGTCGCCGCGGTGACGGCGGCC</p> |



|                     |                                                                                                                                                                                                                                                                                                                                                                                                                                                                                                                                                                                                                                                                                                                                                                                                                                                                                                                                                                                                                                                                                                                                                                                                                                                                                                                                                                                                                                                                                                                                                                                                                                                                                                                                                                                                                                                                                                                                                                                                                                                                                                                                                                                                                                                                                                                                                                                                                                                                                                                                                                                                                                                                                                                                                                                                                                                                                                                                                                                                                                                                                                                                                                                                                                                                                                                                                                                                                                                                                                                                                                                                                                                                                                                               |
|---------------------|-------------------------------------------------------------------------------------------------------------------------------------------------------------------------------------------------------------------------------------------------------------------------------------------------------------------------------------------------------------------------------------------------------------------------------------------------------------------------------------------------------------------------------------------------------------------------------------------------------------------------------------------------------------------------------------------------------------------------------------------------------------------------------------------------------------------------------------------------------------------------------------------------------------------------------------------------------------------------------------------------------------------------------------------------------------------------------------------------------------------------------------------------------------------------------------------------------------------------------------------------------------------------------------------------------------------------------------------------------------------------------------------------------------------------------------------------------------------------------------------------------------------------------------------------------------------------------------------------------------------------------------------------------------------------------------------------------------------------------------------------------------------------------------------------------------------------------------------------------------------------------------------------------------------------------------------------------------------------------------------------------------------------------------------------------------------------------------------------------------------------------------------------------------------------------------------------------------------------------------------------------------------------------------------------------------------------------------------------------------------------------------------------------------------------------------------------------------------------------------------------------------------------------------------------------------------------------------------------------------------------------------------------------------------------------------------------------------------------------------------------------------------------------------------------------------------------------------------------------------------------------------------------------------------------------------------------------------------------------------------------------------------------------------------------------------------------------------------------------------------------------------------------------------------------------------------------------------------------------------------------------------------------------------------------------------------------------------------------------------------------------------------------------------------------------------------------------------------------------------------------------------------------------------------------------------------------------------------------------------------------------------------------------------------------------------------------------------------------------|
|                     | <p>CGGCGCGGGAGATGACGTCGACGAGGAGTTGCTGGAGTTACGCACTCGCACGTCGCGGGCAT<br/> CCTCGGGCATTCCAGCCCGGACGCGGTTCGGGCAGGACCAGCCGTTACCGAGCTCGGGTCCG<br/> ACTCGTGACCGCGGTTCGGGTCGCAACCAGTCCAGCAGGCCACCGGGTTCGCGTCCG<br/> GGACCCCTGGTGTTCGAGCACCCACGGTCCGAGTTGGCCAGCACATAGGACAGCAGC<br/> TCGACAGCGGGACTCCCGCCGGGAAGCGAGCAGCGCTCTTCGCGACGGCTACCGGCAGGC<br/> GGGCGTGTTCGGGCAGGTCCGGTCTACCTCGACCTGCTGGCGGGGCTGTTCGGACTCCGCG<br/> AGCACTTCGACGGCTCCGACGGGTTCCTCCCTCGATCTCGTGGACATGGCCGACGGTCCCGGA<br/> GAGGTCACGGTGATCTGCTGCGCGGAACGGCGGGCATCTCCGGTCCGCACGAGTTACCC<br/> GGCTCGCCGGGGCGTTCGCGGAATCGTCCGGTTCGGGCCGTGCCACGCCGGCTACGA<br/> GGAGGGCGAACCTCTGCGTTCGATGGCGGGGTCGGCGGGTGCAGGCCGATGCGGTC<br/> ATCAGGACACAGGGGGACAAGCCGTTTCGGTGGCCGGTACTCCGCGGGGGACTGATGG<br/> CCTACGCGTGGCGACCGAAGTTCGATCGCGGGCACCCGCCACCGGTTGCTCGTCTGATC<br/> GACGTCTACCCGCCGGTACCCAGGACGCGATGAACGCCTGGTGGAGGAGTGACCGCCA<br/> CGTGTTCGACCGGAGACGGTTCGGATGGACGACACCAGGCTACCGCCCTGGGGCCTA<br/> CGACCGCTACCGGTACGTGGCGACCCCGGAAACCGGGTTCGCGACGCTGCTGGTACG<br/> GCCGGCAGCCGATGGTTCGTCGGCCGACGACAGCTGGAAGCCGACGTCGCCCTTCGAGC<br/> ACGACACCGTCCCGTCCCGGGCACCACTTCACGATGGTGCAGGACCGCCGACGCGAT<br/> CGCGGGCACATCGACGCTGGTGGCGGAGGGAATTCGAGCTCCGTCGACAAGCTTGGC<br/> GCCGACTCGAGCACACCACCACCACCCTGA</p>                                                                                                                                                                                                                                                                                                                                                                                                                                                                                                                                                                                                                                                                                                                                                                                                                                                                                                                                                                                                                                                                                                                                                                                                                                                                                                                                                                                                                                                                                                                                                                                                                                                                                                                                                                                                                                                                                                                                                                                                                                                                                                                                                                                                                                                                                                                                                                                                                                                                             |
| <p>H1 (pMJD077)</p> | <p>ATGGCTAGCACTGACAGCGAGAAGGTGGCGGAGTACCTCCGTCGGGGCAGGCTCGACCTGC<br/> GTGCCGCCGGCAGCGCATCCCGGAGCTGGAATCCGACCCGATCGCGATCGTCGGCATGGC<br/> CTGCCGTTCCCGGGCGGCGTGCACAACCCCGGTGAGCTGTGGGAGTTCATCGTCGGCGGGC<br/> GAGACGCCGTGACGGAGATGCCACCGACCGCGGTGGGACCTCGACGCGCTGTTCGACCC<br/> CGACCCGACGCGCCACGGAACCAGTACTCGCGACACGGCGGTTCCTCGACGGGGCCGCC<br/> GACTTCGACGCGGGTTCCTCGGGATCTCGCGCGCGAGGCGTTCGGATGGACCCGCGAGA<br/> GCGCCAGGTCTGGAACGACGTGGGAGCTGTTCGAGAACGCCGCATCGACCCGCACTCG<br/> CTGCGGGGACGCGACACCGGCTTCCTCGCGCGCGTACCAGGGTACGGCCAGGACG<br/> CGGTGGTGCAGGACAGCGAGGGTACCTGCTACCGGCAACTCCTCCGCGTGGTGTCC<br/> GGCCGGTTCGCTACGTGCTGGGGTGAAGGCCCGCGGTACCGTGGACACGGCGTGT<br/> CGTCGTCGTTGGTGGCTTGCATTCCGGCTGTGGGTGTTGCGTGACGGTGAATGCGGCTTG<br/> CGGTGGCCGGTGGTGTTCGGTATGGCGGGCCCGAGGTGTTACCGAGTTCCTCCGCCAG<br/> GGCGCTTGGCCGTGGACGGGCGTGAAGGCGTTCCTCCGCGGAGGCCGACGGCTTCGGTT<br/> CGCCGAGGGCGTTCGGTGGTCTGCTCCAGCGGTTGTCGACGCCCGAGGGCGGGTCCG<br/> AGGTGCTCGGGCGTGGTTCGCGGATCAACCAGGACGGCGAGCAACGGTCTCGC<br/> GGCGCCGAGCGGGCGTCCCGACGCGCGTATCCGCAAGGCGTGGGCGCGTTCGGGGATC<br/> ACGGCGCGGATGTGGCGTGGTGGAGGCGCATGGGACCGGTACCGCGTGGGCGATCCCG<br/> TGGAGGCGTGGCGTGGTGGTACTTACGGCAAGTTCGCGCGGGTTCGCGCCCGTGGTGT<br/> CTGGGTTCCGTTAAGTCAACATCGGTACCGCGAGGCGCGGCGTGGGCGGCGTGA<br/> TCAAGGTGGTCTGGGGTTGAACCGCGGCTGGTGGCCCGATGCTCTGCCGCGGCGAGCGG<br/> TCGCCGCTGATCGAATGGTCTCGGGTGGTGTGGAACCTGCGGAGGCCGTGAGCCCGTGGCC<br/> TCCGGCCGCGGACGGGGTGCGCCGGGCGGTGTGTGGCGTTCGGGGTGAAGCGGACGAAC<br/> GCGACGTGATCATCGCCGAGCCCGGAGGCCGAGCCGTCGCGGAACCGGACCGTGG<br/> GCGTGTGGCCGTGCGAACTCGGTGCCCTACTGCTGTCCGCCAGGACCGAGCCGCTTG<br/> GCAGCGAGGCGCGGCTCCTGGAGTCCGACGTGGACGACTCGGTTCCGTTGACGGCATTGGC<br/> TTCCGCGTGGCCACCGGACGCGCCACCTGCCGCGTGTGCGGCGTGTGGCAGGCGACC<br/> ACGAACAGCTCCGCGGGCAGTTGCGAGCGGTGCGCGAGGCGTTCGGCTCCCGTGGC<br/> CACCGAACCCTCCaacaagcgccactctggtcatctgctcagggatggcagctggcggtgagcctatg<br/> cgctggacagcttcctgagctatctcgcctccgatgagctgtgaagccgtgggagtgaaagtgcagatctgctgtgacacagatgagcgca<br/> cctttgatgacatctgctcctttgtagcctcactccatccagattgcccctcagcactactgactctgtgggactgaaacctgacggcatattgg<br/> gcactctgggagaggttcctgtgctatgagatggctctctccagagagaggtgtgcttgcagctactggcagggccagtgatcaaaagat<br/> gcccactcccgcctgacatccatggcagctgtggtttctcctgggaggaatgtaaacacgctgccccgctggcggtgctgctgctgcccacaactg<br/> aggacaccgtgacctctggacctgagctcagtgatgaatgattggagcagctaaagcaagaggtgtgttccaagaggtacgaacagga<br/> ggcctggcttccactctactcatggaaggaaftgccccacattgctcagggctctcaagaggtgatccgggaaccacggccgctcggctcgat<br/> ggctcagcaactctatcctgagggcagtgagcagcagcctgcccgcacatcttctccgagtaaatgtaacaacctgtgagcctgtgctctt<br/> ccaggaagcactgtggcacatccctgagcatgctggtgctggagattgccccacgcaactgttcagggctgtctgaagcgagggctgaaagcca<br/> gctgcacatcattccctgatgaagaggatcataaagataactggagttcttctcaacaacttggcaaggtgcactcacaGGCGTGCCG<br/> TGGACTGGCGGAACGCTTCCCGCGGCACCTCCGGTGGCGCTGCCAACTACCCGTTCCGAG<br/> CCCCAGCGGTAAGTTCGCGCCGGAGGTGTCCGACCACTCGCCGACAGCCGCTACCGCGT<br/> CGACTGGCGACCGTGGCCACCACGCCGGTGGACCTGGAAGGGCGCTTCCTGGTCCACGGG<br/> TCCGCACCGGAGTTCGTCGACAGCGCAGTCGAGAAGGCCGCGTCCGCTCGTGGCGGTCG<br/> CCTCGGCCGACCGGAAGCGCTCGCGCGGCCCTGCGGGAGGTGCCGGGCGAGGTGCGCGG<br/> CGTGTCTCGTCCACACCGGGCCGCAACGCACCTCGCCCTGACCAAGTTCGCTGGGTGAGG<br/> CCGGCGTGGGGCCCGCTCTGGTGGTACCAGCCGAGCGGTCCGCTCGGGGAGTCCGA<br/> GCCGGTTCGATCCCGAGGCGATGGTGTGGGGTTCGGGCGCTCGGGCGCTGAGAC<br/> CCGGAACGGTGGGGCGGTCTGGTGGACCTGCCCGCGAACCCGCGCCGGGGACGGCGAGG<br/> CGTTCGTCGCTGCTCGGCGCGGACGGCCACGAGGACAGGTTCGCGATCCGTGACCACGGC<br/> CGTACGGCCCGCCTCGTCCGCGCCCGCTGGGCACCCGCGAGTCCGAGCTGGGAGCCCG<br/> CGGGCACGGCGTGGTCAACGGCGGCACCGGTGCGCTCGGCGGACAGCTCGCCGCCACT<br/> CGCCAGGTGCGGGGTGGAGGACCTGGTGTGGTACGAGGCGCGGCGTTCGACGCTCCCGG<br/> CGCGCCGAGCTGGAAGCGAAGTGGTGCCTCGGCGCAAGACGACCATCACCGCTGCG</p> |

|                       |                                                                                                                                                                                                                                                                                                                                                                                                                                                                                                                                                                                                                                                                                                                                                                                                                                                                                                                                                                                                                                                                                                                                                                                                                                                                                                                                                                                                                                                                                                                                                                                                                                                                                                                                                                                                                                                                                                                                                                                                                                                                                                                                                                                                                                                                                                                                                                                                                                                                                                                                                                                                                                                                                                                                                                                                                                                                                                                                                                                                                                                                                                                            |
|-----------------------|----------------------------------------------------------------------------------------------------------------------------------------------------------------------------------------------------------------------------------------------------------------------------------------------------------------------------------------------------------------------------------------------------------------------------------------------------------------------------------------------------------------------------------------------------------------------------------------------------------------------------------------------------------------------------------------------------------------------------------------------------------------------------------------------------------------------------------------------------------------------------------------------------------------------------------------------------------------------------------------------------------------------------------------------------------------------------------------------------------------------------------------------------------------------------------------------------------------------------------------------------------------------------------------------------------------------------------------------------------------------------------------------------------------------------------------------------------------------------------------------------------------------------------------------------------------------------------------------------------------------------------------------------------------------------------------------------------------------------------------------------------------------------------------------------------------------------------------------------------------------------------------------------------------------------------------------------------------------------------------------------------------------------------------------------------------------------------------------------------------------------------------------------------------------------------------------------------------------------------------------------------------------------------------------------------------------------------------------------------------------------------------------------------------------------------------------------------------------------------------------------------------------------------------------------------------------------------------------------------------------------------------------------------------------------------------------------------------------------------------------------------------------------------------------------------------------------------------------------------------------------------------------------------------------------------------------------------------------------------------------------------------------------------------------------------------------------------------------------------------------------|
|                       | <p>ACGTGGCCGACCGCGAGCAGCTCTCCAAGCTGCTGGAAGAACTGCGCGGGCAGGGACGTCC<br/> GGTGCAGGACCGTCTGTCACACCGCCGGGGTGCCTCAATCGAGGCCGCTGCACGAGATCGGC<br/> GAGCTGGAGTCGGTCTGCGCGGCGAAGGTGACCGGGGCCGGTGTCTCAGCAGCTGTGCC<br/> CGGACGCCGAGACCTTCTGCTCTGTTCTCGTCCGGAGCGGGGGTGTGGGACGTCGAACCTC<br/> GGCGCTACTCCGCGGCCAACGCCTACCTCGACGCGCTGGCCACCGCCCGCTGCGGAAG<br/> GCCGTGCGGGCAGCTCCGTCGCGTGGGGCGCCTGGGCGGGCGAGGGCATGGCCACCGGCGA<br/> CCTCGAGGGGCTACCCGGCGCGCCTGCGCCCGATGGCGCCGAGCGCGCATCCGCGCG<br/> CTGCACCAGGCGCTGGACAACGGCGACACGTGCGTTTCGATCGCCGACGTCGATGGGAGC<br/> GCTTCGCGGTGCGCTTACCAGCGCCCGGCGCGTCCGCTGCTGGACGAGCTCGTACGCGG<br/> GCGGTGGGGGCCGTCCCGCGGTGCAGGCGGCCCGGCGCGGAGATGACGTGCGAGGAGT<br/> TGCTGGAGTTCACGCACTCGCACGTCGCGGCGATCCTCGGGCATTCCAGCCCGGACGCGGT<br/> GGGACGACCAGCGTTCACCGAGCTCGGCTTCGACTCGCTGACCCGCGTCCGGCTGCGCA<br/> ACCAGCTCCAGCAGGCCACCGGGCTCGCGCTGCCCGGACCCCTGGTGTTCGAGCACCCACG<br/> GTCCGACAGGTTGGCCGACCACATAGGACAGCAGCTCGACAGCGGGACTCCCGCCGGGAAG<br/> CGAGCAGCGCTCTTCGCGACGGTACCGGCAGGCGGGCGTGTGGGACAGGTTCCGGTCTTA<br/> CCTCGACTGCTGGCGGGGCTGTCGACTTCCGCGAGCACTTCAGCGCTCCGACGGTTCGAGG<br/> CCCTCGATCTCGTGGACATGGCCGAGGTCGCGGAGAGGTCACGGTATCTGCTGCGCGGGA<br/> ACGGCGGGATCTCCGGTCCGCACGAGTTCACCCGGTCTGCCGGGGCGCTGCGCGGAATCG<br/> CTCCGGTTCGGGCCGTGCCCGACCCGGCTACGAGGAGGGCGAACCTCTGCCGTGTCGATG<br/> GCGGCGGTGGCGGCGGTGCAGGCCGATGCGGTATCAGGACACAGGGGACAAGCCGTTCG<br/> TGGTGGCCCGTCACTCCGCGGGGGCACTGATGGCCCTACGCGCAGGCGACCGAATGCTCGAT<br/> CGCGGGCACCCGCCACGCGGTGTCTGCTGATCGACGCTTACCCGCCCGGTACCAGGACGC<br/> GATGAACGCTGGTGGAGGAGCTGACCGCCACGCTGTTTCGACCGCGAGACGGTGCAGGATG<br/> GACGACACCAGGCTACCGCCCTGGGCGCTACGACCGCCTACCCGGTTCAGTGGGCGACCC<br/> GGGAAACCGGGTGCAGCGCTGCTGGTACGCGCGGCGAGCGGATGGGTCCGTGGCCCGA<br/> CGACAGCTGGAAGCCGACGTGGCCCTTCGAGCACGACACCGTCGCGTCCCGGCGACCC<br/> TTCAGATGGTGCAGGAACACCGCGACGCGATCGCGCGGACATCGACGCTGGCTGGGGC<br/> GAGGAATTGAGCTCCGTCGACAAGCTTGGCGCCGACTCGAGCACACCACCACCACCA<br/> CTGA</p>                                                                                                                                                                                                                                                                                                                                                                                                                                                                                                                                                                                                                                                                                                                                                                                                                                                                                                                                                                                                                                                                                                                                                                                                |
| <p>H1.1 (pMSR001)</p> | <p>ATGGCTAGCACTGACAGCGAGAAGGTGGCGGAGTACCTCCGTCGGGCGACGCTCGACCTGC<br/> GTGCCGCCCGGCAGCGCATCCGCGAGCTGGAATCCGACCCGATCGCGATCGTCCGCATGGC<br/> CTGCCGCTTCCCGGGCGCGTGCACAACCCCGGTGAGCTGTGGGAGTTCATCGTCCGCGCG<br/> GAGACGCGGTGACGGAGATGCCACCGACCGCGGTGGGACCTCGACGCGCTGTTCCGACCC<br/> CGACCCGACGCGCCACGGAACCGACTACTCGGACACGCGCGGTTCCTCGACGGGCGCC<br/> GACTTCGACGCGCGTTCCTCGGGATCTCGCCGCGGAGGCGCTGGCGATGGACCCGCAGCA<br/> GCGCCAGGTCTGGAAACGACGTGGGAGCTGTTTCGAGAACCGCGCATCGACCCGCACTCG<br/> CTGCGGGGACGCGACACCGCGTCTTCTCGGCGCGCGTACCAGGGCTACGGCCAGGACG<br/> CGTGGTGGCCGAGGACAGCGAGGGCTACCTGCTACCCGCAACTCCTCCGCGTGGTCTCC<br/> GGCCGGTTCGCTACGCTGCTGGGGTGGAAAGGCCCGCGGTACCGGTGGACACGGCGTGT<br/> CGTTCGCTGGTGGTGGCTTGCATTCGCGGTGTGGGTCGTTGCGTGCAGGCTGACTGCGGTCTG<br/> CGGTGGCCGGTGGTGTGTCGGTATGGCGGGCCCGAGGTTTACCAGATTCTCCCGCCAG<br/> GGCGCTTGGCCGTGGACGGGCGCTGAAGGCGTTCCTCCGCGGAGCCGACGGCTTCGGTTC<br/> CGCCGAGGGCGTCCGGTGGTCTGCTCCAGCGTTCGCGACGCCCGAGGGCGGGTCCGCC<br/> AGGTGCTCGGCGTGGTCCGCGGCTCGCGATCAACCAGGACGGCGGAGCAACGGTCTCGC<br/> GGCGCCGAGCGCGTCCCGAGCAGCGCGTGCATCCGCAAGGCGTGGGCGCGTGCGGGGATC<br/> ACGGGCGCGGATGTGGCGTGGTGGAGGCGCATGGGACCGGTACGCGGTGGGCGATCCGG<br/> TGGAGGCGTCCGCGTGTGCTGGCTACTACGGCAAGTCGCGCGGTTCGCGGCTGAGCCGAC<br/> CTGGGTTCCGGTGAAGTCGAACATCGGTACGCGCAGGCGCCCGGGTGTGCGGGCGTGA<br/> TCAAGGTGGTCTGGGGTTGAACCGCGGCTGGTGCAGCGGATGCTGTCGCGCGGAGCGG<br/> TCGCGCTGATCGAATGGTCTCGGGTGGTGGAACTTCCGAGGGCTGAGCCCGTGGCC<br/> TCCGCGCGGACGGGGTGCAGCGCGCCACTGCGCGTCTGTCGCGGTTTCGCGGAGCCGAC<br/> GCGCACGTGATCATCGCCGAGCCCCGAGCCGAGCGCTGCCGGAACCCGACCGGTGG<br/> GCGTGTGCGCGTGCAGAACTCGTGCCTGCTGCTGTCGCGCCAGGACCGAGACCGCGTTC<br/> GCAGCGCAGGCGCGGCTCTGGAGTCCGAGTGGACGACTCGGTTCCGTTGACGGCATTGGC<br/> TTCCGCGTGGCCACCGGACGCGCCACTGCGCGTCTGTCGCGGTTGCTGGCAGCCGAC<br/> ACGAAACAGCTCCGCGGGCAGTTGCGAGCGGTGCGCGAGGGCGTTCGCGCTCCCGGTGCCAC<br/> CACCGGAACCGCTCCaacaagcggcactctggttcatctcagggatgggacagcagtgccgaggatgggctgagcctcatg<br/> cgctggacagcttccgtgagttatctcgcctccgatgagcgtgtaagccgtgggagtgaaagtgtcagatctgctgtgagcacagatgagcgca<br/> cctttgatgacatgtgatgcttctgagcctactgcatccagattgcctcactgacactactgacttctgtggagctgaaacctgacggcattgg<br/> gactccttgggagaggttgcctgtgctatgcagatggctctctccagagagagggctgtgcttgcagcttactgagcagggcagtgcatcaaatg<br/> gcccactcccgcctggatccatggcagctgtgtttctctgggaggaatgtaaacagcgtgccccgctgctgctgctgctgcccacaactctg<br/> aggacaccgtgacatctctgacctcagcctcagtgatgaatggtggagcagctaaagcaagaaggtgtttgccaagggatgacgaacaggga<br/> ggcctgcttccactcacttcatggaaggaattgccccacattgctcaggetctcaagaaggtgatcgggaaccagggccgctcggctgctg<br/> ggctcagcacctctatccctgaggccagtgccagagcagcctggcccgcacatctctgcccagtgacaatgtaacaacctgggtgagcctgtgctctt<br/> ccaggaagcactgtggcacatccctgagcatgctgctggtgagattgcgccccagcactgttcagcgtgctctgaaagcagggctgaaagtcca<br/> gctgacacatccttctgatgaagaggatcataaagataactggagttcttccacaacctggcaaggtgacacccacaGGCGTGGCCG<br/> TGGACTGGCGGAACGCTTCCCGGGCGCACCTCCGGTGGCGCTGCCAACTACCCGCTTCCGAG<br/> CCCAGCGGTAAGCTCGCGCCGAGGTTGTCGACACGCTCGCCGACCGCTCGCCGCTACCGCGT<br/> CGACTGGCGACCGTGGCCACCACGCGGTGGACCTGGAAGGCGGCTTCTGGTCCACGGG<br/> TCCGACCCGAGTTCGCTGACCAGCGAGTCGAGAAGGCCGAGGCCGCTGTCGCGGTCG</p> |

CCTCGGCCGACCGCGAAGCGCTCGCGGGCGGCCCTGCGGGAGGTGCCGGGCGAGGTGCGCGG  
CGTGCTCTCGGTCCACACCGGGCGCCGAACGCACCTCGCCCTGCACCAAGTCGCTGGGTGAGG  
CCGGGTGCGGGCCCCGCTCTGGTGGTCAACAGCCGAGCGGTGCGCTCGGGGAGTCCGA  
GCCGGTCGATCCCGAGCAGGCGATGGTGTGGGTCTCGGGCGCGTCATGGCCCTGGAGACC  
CCGGAACGGTGGGGCGGTCTGGTGGACCTGCCCGCCGAACCCGCGCCGGGGGACGGCGAGG  
CGTTCGTGCTGCTCGCTCGGGCGGGACGGCCACGAGGACCAGGTCGCGATCCGTGACCACGCC  
CGCTACGGCCCGCCGCTCGTCCGCGCCCCGCTGGGCACCCGCGAGTCGAGCTGGGAGCCGG  
CGGGCACGGCGCTGGTCAACGGCGGCACCGGTGCGCTCGGGCGCCACGTCGCCCGCCACCT  
CGCCAGGTGCGGGGTGGAGGACCTGGTGTGGTCAAGCAGGCGGGCGTGCACGCTCCCGGC  
GCGGCCGAGCTGGAAGCCGAACCTGGTGCCTCGGGCGCAAGACGACCATCACGCCTGCG  
ACGTGGCCGACCGCGAGCAGCTCTCAAGCTGCTGGAAGAACTGCGCGGGCAGGGACGTCC  
GGTGCAGACCGTCTGTGCACACCGCGGGGTGCCCAATCGAGGCCGCTGCACGAGATCGGC  
GAGCTGGAGTCGGTCTGCGCGGGCAAGGTGACCGGGCCCGGGTGTCTGACGAGCTGTGCC  
CGGACGCCGAGACCTTCGTCTGTCTCGTCCGGAGCGGGGGTGTGGGGCAGTGCGAACCTC  
GGCGCTACTCCGCGGCAACGCCTACCTCGACGCGCTGGCCACCGCCGCGCTGCGGAAG  
GCCGTGCGGGCAGTCCGTGCGGTGGGGCGCCTGGGGCGGACGAGGCGATGGCCACCGGCA  
CCTCGAGGGGCTACCCGGCGCGGCTGCGCCCGATGGCGCCGAGCGCGGACCGCGCGG  
CTGCACCAGGCGTGGACAACGGCGACACGTGCGTTTCGATCGCCGACGTCGACTGGGAGC  
GCTTCGCGGTGCGCTTACCGCCGCGCCGCGCGCTCCGCTGCTGGACGAGCTCGTACGCGG  
GCGGTGGGGGCCGTCCCGCGGTGACAGGCGCCCCGGCGGGGAGATGACGTCGACGAGT  
TGCTGGAGTTCACGCACTCGCACGTCGCGGGCATCTCGGGCATTCCAGCCCGACGCGGTC  
GGGCAGGACCAGCCGTTACCGAGCTCGGCTTCGACTCGCTGACCGCGGTGCGGGCTGCGCA  
ACCAGCTCCAGCAGGCCACCGGGCTCGCGCTGCCCGCACCTGGTGTTCGAGCACCCACG  
GTCCGCAGGTTGGCCGACCACATAGGACAGCAGCTCTCCGGGGCCGACACCGGGCGCCGGG  
CCGGGATGTTCCGCGCCCTGTTCCGGCAGGCCGTGGAGGACGACCGGTACGGCGAGTTCCTC  
GACGTCCTCGCGAAGCCTCCGCGTTCGCCCCGAGTTCGCCTCGCCGAGGCCCTGCTCGGA  
GCGGTCGACCCGGTGTGCTGCTCGCCGGCGGTCCGACGACCGGGCGGAAGGCCGTGCCGTT  
CTCGTGGGCTGACCCGGCACCGCGGCGAACGGCGGCCGACGAGTTCGCGGGCTCAGCA  
CCTCCTCCAGGAGGAGCGGGACTTCTCGCCGTACCTCTCCCCGGTACGGCACGGGTACG  
GGCACCGGCACGGCCCTCTCCCGGCCGATCTCGACACCGCGCTCGACGCCAGGCCCGGGC  
GATCCTCCGGGCGCCGGGGACGCCCGGTGCTCCTGCTCGGGCACTCCGGCGGGCGCCCTGC  
TCGCGCACGAGCTGGCCTTCCGCTGGAGCGGGCGCACGGCGCGCCCGCGGGGATCGT  
CCTGGTCGACCCCTATCCGCGGGCCATCAGGAGCCATCGAGGTGTGGAGCAGGCAGCTG  
GGCGAGGGCCTGTTCCGCGGGCAGCTGGAGCCGATGTCCGATGCGCGGCTGCTGGCCATGG  
GCCGGTACGCGCGGTTCCTCGCCGGCCCGCGGGCCGGCCGACGAGCGCGCCGCTGCTTCTG  
GTCCGTGCCTCCGAACCGCTGGGCGACTGGCAGGAGGAGCGGGGCGACTGGCGTGCCCACT  
GGGACCTTCCGCACACCGTCCGCGGACGTGCCGGGCGACCACTTACGATGATGCGGGACCA  
CGCGCCGGCCGTCGCCGAGGCCGCTCTCCTGGCTCGACGCCATCGAGGGCATCGAGGGG  
GCGGGCAAGAGCTCCGTCGACAAGCTTTCGGCCGCACTCGAGCACCAACCACCACCACT  
GA

## 6.1 Supplementary note: Stereochemistry of 18

During the biosynthesis of compound **18**, two new stereo centers at position C2 and C3 are formed.  $^1\text{H-NMR}$  and  $^{19}\text{F-NMR}$  showed that only one stereoisomer was synthesized. To determine the stereochemistry of compound **18**, we predicted the 3D structures of all possible diastereomers using the software Avogadro with UFF force field (Steepest decent) algorithm and no constraints (see Supplementary Note Fig. 1). The template for the models was the structure of 10-deoxymethynolide, solved by crystallization of the pikromycin thioesterase (PDB code: 2hfk, E4H). We used the models to calculate characteristic distances (d1-d5) in the stereoisomers, more precisely, the distance of the hydrogen of the alkene group at C8 to the nearest neighbors (methyl groups at C6 and C9, methylene group at C5) and to the methyl group at C2, as well as the distance of the methyl group at C2 to the hydrogen of the methylene group at C5 (see Supplementary Note Fig. 1). Furthermore, we calculated the dihedral angle between the hydrogen of the CHOH group at C3 to the hydrogen of the CHCH<sub>3</sub> group at C4 (HCCH angle, blue arrow) and to the fluorine at C2 (HCCF angle, red arrow).

For the first analysis, we used the coupling constants of the  $^1\text{H-NMR}$  to determine which stereoisomer was produced, more precisely the signal at 3.68 ppm, corresponding to the hydrogen at C3 (dd,  $^3J_{\text{FH}} = 26.41$ ,  $^3J_{\text{HH}} = 1.1$  Hz, 1H). With an improved Karplus equation, taking electronegativities of the substituents into account, we calculated the coupling constant of each stereoisomer model (Supplementary Note Table 1, equation 3)<sup>26,27</sup>. We received the values for the substituent's electronegativity from Altona and used the value of CH<sub>2</sub>F for the CCH<sub>3</sub>FC group and the value of CH<sub>2</sub>X (0.65) for the CH<sub>2</sub>C group<sup>26</sup>. Using that analysis we could clearly exclude stereoisomer 2 and 4, since the calculated coupling constants deviate strongly from the experimental ones ( $^3J_{\text{HH}} = 1.1$  Hz).

Next, we used the  $^3J_{\text{FH}}$  coupling constant of 26.41 Hz to further distinguish between stereoisomer 1 and 3. We considered a study, which developed a Karplus equation in respect to the CHHF torsion angle (equation 4)<sup>28</sup>. We again received the values for the substituent's electronegativity from Altona and used the value of CHCH<sub>3</sub>X for the CHCH<sub>3</sub>C group (0.6) (Supplementary Note Table 2, equation 4)<sup>26</sup>. The results confirmed the  $^3J_{\text{HH}}$  coupling constant analysis, as the  $^3J_{\text{HF}}$  coupling constant of stereoisomer 2 and 4 did not correlate with the experimental ( $^3J_{\text{FH}} = 26.41$  Hz). Although the calculated  $^3J_{\text{FH}}$  coupling constant for stereoisomer 1 fits much better to the experimental, we could not exclude stereoisomer 3, especially, because we used structural models. Therefore, we performed a NOESY experiment after another purification of the product in higher yields. We focused on the hydrogen of the alkene group at C8 ( $^1\text{H NMR}$  peak at 6.47 ppm) as the signal of the methyl group at C2 overlapped with the methylene group at C12. In the NOESY experiment, we found NOE signals to 1.18 ppm, 1.21 ppm and 2.00 ppm, which correspond to the methyl group at C10 (distance about 2.3 Å), to the methyl group of C6 (distance about 2.6 Å) and to the methylene group at C5 (distance about 2.2 Å, Supplementary Note Fig. 3-4). In contrast, we did not find a NOE signal of the methyl group at C2 ( $^1\text{H NMR}$  peak at 1.63 ppm) to the alkene group at C8 (distance 2.45 Å in stereoisomer 3) and no signal to the methylene group at C5 (distance 2.03 Å in stereoisomer 3). Therefore, we could exclude stereoisomer 3, as these signals should be observed for that case. The results show that hybrids **H1** and **H1.1** exclusively synthesize stereoisomer 1 with a 2S, 3S configuration.

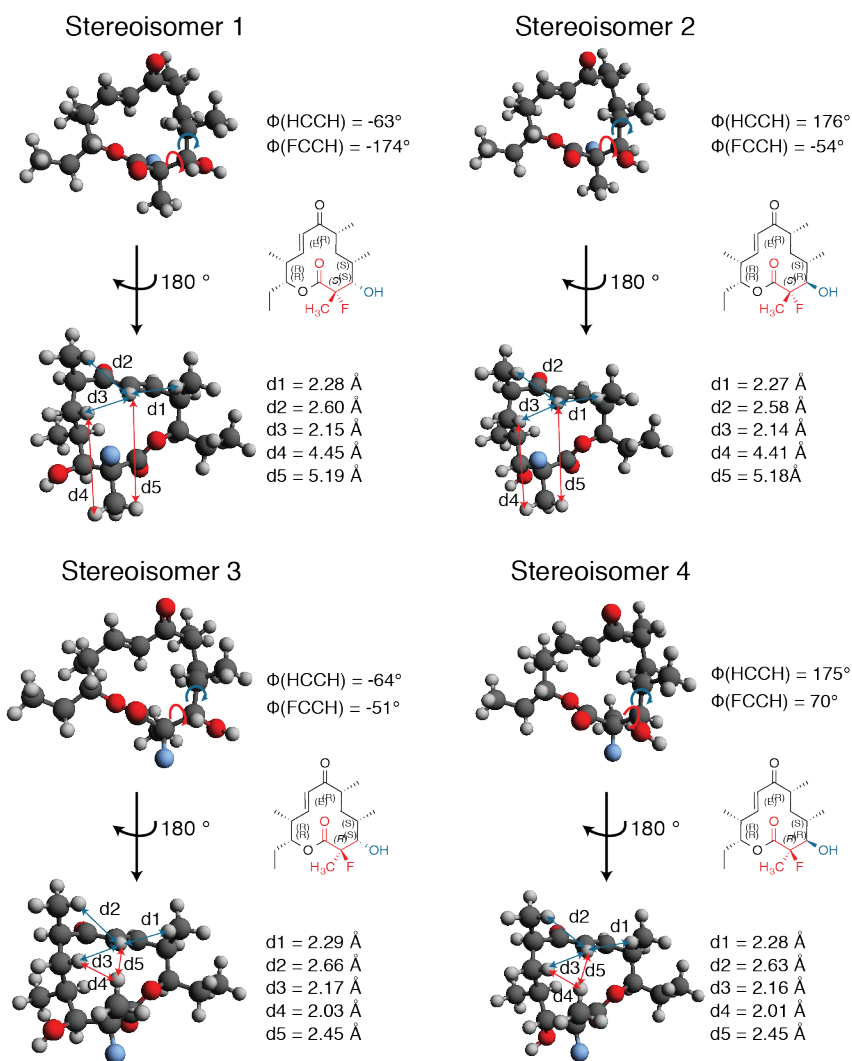

**Supplementary Note Fig. 1: 2D and 3D structure of all possible stereoisomers, created by chemdraw and Avogadro.**

Dihedral torsion angles between HCCH (C3-C4, blue arrow) and HCCF (C2-C3, red arrow) were calculated with Avogadro. Characteristic distances were also calculated by Avogadro and shown with blue arrows (d1-d3) for observed NOE signals and red arrows for non-existent NOE signals.

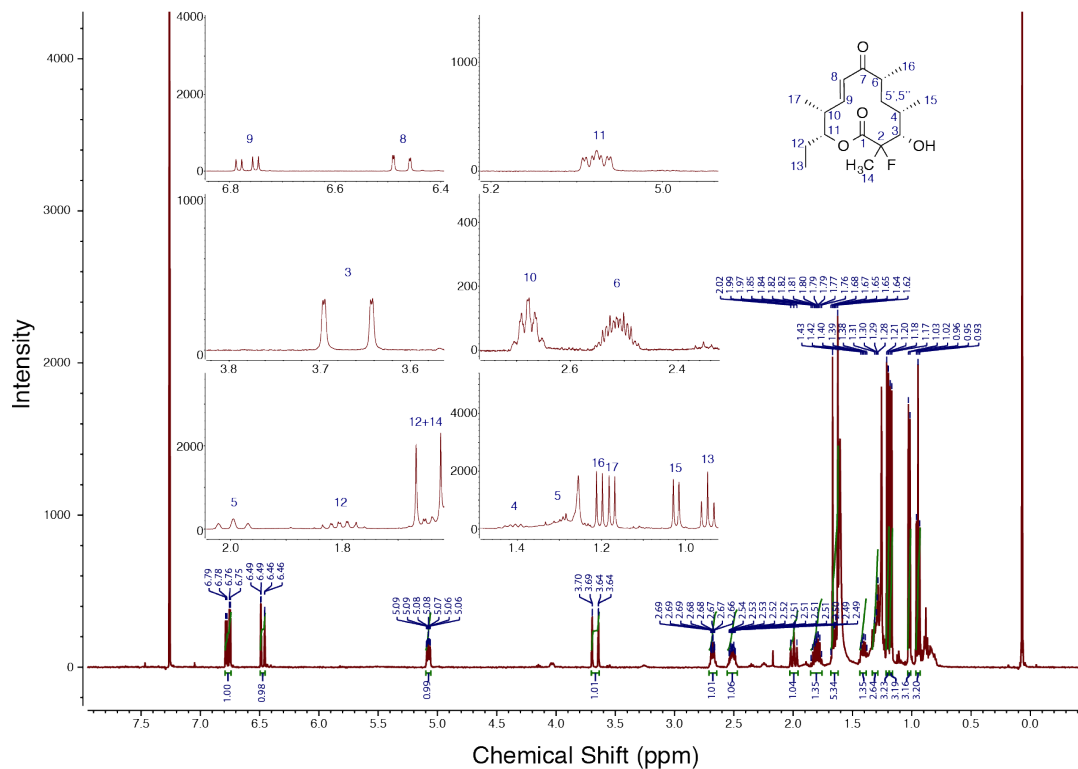

**Supplementary Note Fig. 2: <sup>1</sup>H-NMR analysis of the product and assignment of the peaks.**

The assignment was done with the help of the COSY and HSQC experiment (spectra in the appendix). NMR spectrum was measured on a 500 MHz instrument (Bruker) with the solvent CDCl<sub>3</sub> and processed with TopSpin (version 4.1.1) and structures were created with ChemDraw (version 14.0).

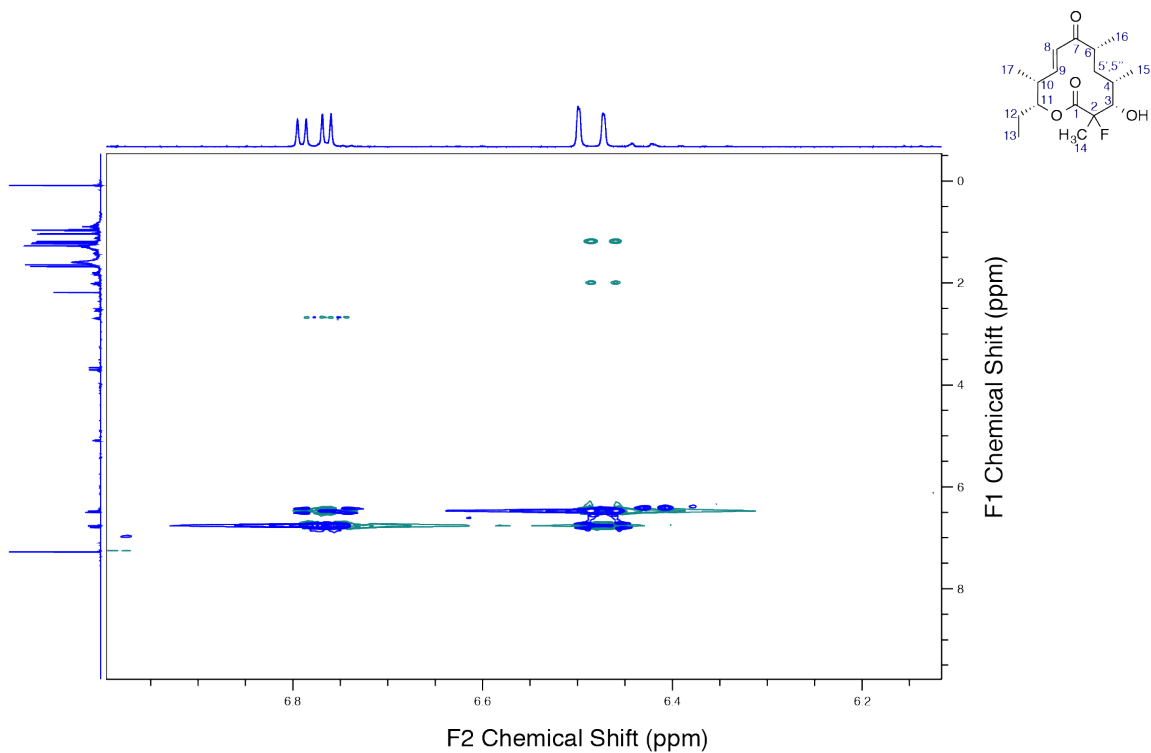

**Supplementary Note Fig. 3: Selected view of the NOESY experiment with compound 18.** NMR spectrum was measured on a 600 MHz instrument (Bruker) with the solvent  $\text{CDCl}_3$  and processed with TopSpin (version 4.1.1).

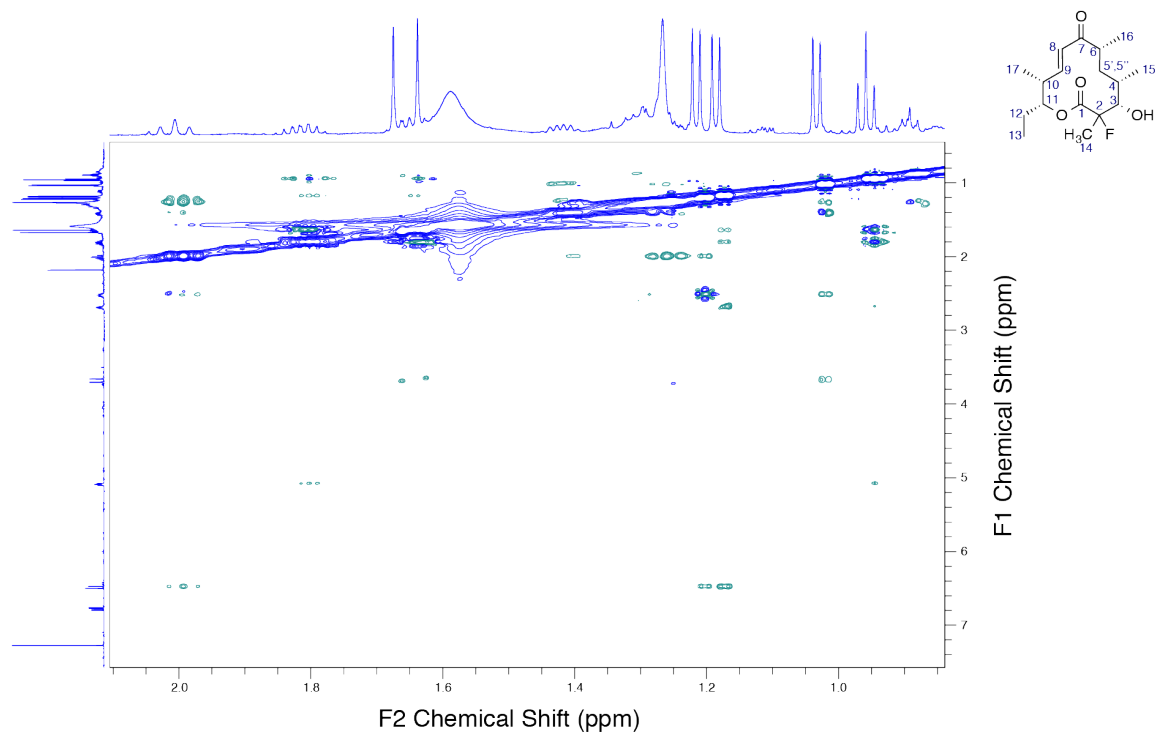

**Supplementary Note Fig. 4: Selected view of the NOESY experiment with compound 18.**

NMR spectrum was measured on a 600 MHz instrument (Bruker) with the solvent  $\text{CDCl}_3$  and processed with TopSpin (version 4.1.1).



**Supplementary Note Table 1: HCCH dihedral angles ( $\Phi$ ) between C3 and C4 and experimental and calculated  $^3J_{\text{HH}}$  coupling constants.**

$\lambda_i$  is the electronegativity and  $s_i$  the sign factor of the substituent <sup>26,27</sup>.

|          | $\phi(\text{HCCH})$ | $^3J_{\text{HH}}$ | OH: $\lambda_1; s_1$ | CCH <sub>3</sub> FC: $\lambda_2; s_2$ | CH <sub>2</sub> C: $\lambda_3; s_3$ | CH <sub>3</sub> : $\lambda_4; s_4$ |
|----------|---------------------|-------------------|----------------------|---------------------------------------|-------------------------------------|------------------------------------|
| Exp.     |                     | 1.1               |                      |                                       |                                     |                                    |
| Isomer 1 | -63                 | 1.28              | 1.33; 1              | 0.65; -1                              | 0.65; 1                             | 0.8; -1                            |
| Isomer 2 | 176                 | 12.47             | 1.33; -1             | 0.65; 1                               | 0.65; 1                             | 0.8; -1                            |
| Isomer 3 | -64                 | 1.09              | 1.33; 1              | 0.65; -1                              | 0.65; 1                             | 0.8; -1                            |
| Isomer 4 | 175                 | 12.40             | 1.33; -1             | 0.65; 1                               | 0.65; 1                             | 0.8; -1                            |

$$\begin{aligned}
 3J(H, H) = & 14.64 \cos^2(\phi) - 0.78 \cos(\phi) + 0.58 & [3] \\
 & + \sum_i \lambda_i [0.34 - 2.31 \cos^2(s_i(\phi) + 18.40 |\lambda_i|)]
 \end{aligned}$$

with  $\lambda_i$  = the electronegativity of the substituent,  $s_i$  = sign factor of the substituent <sup>26,27</sup>.

**Supplementary Note Table 2: HCCF dihedral angles ( $\Phi$ ) between C2 and C3 and experimental and calculated  $^3J_{\text{HF}}$  coupling constants.**

$\lambda_i$  is the electronegativity,  $\xi_i$  the sign factor of the substituent and  $a_{\text{FCC}}$  and  $a_{\text{HCC}}$  the respective bond angles<sup>26,28</sup>.

|          | $\phi(\text{HCCF})$ | $^3J_{\text{HF}}$ | OH: $\lambda_1; s_1$ | CHCH <sub>3</sub> C:<br>$\lambda_2; s_2$ | COOR: $\lambda_3; s_3$ | CH <sub>3</sub> : $\lambda_4; s_4$ | $a_{\text{FCC}}; a_{\text{HCC}}$ (°) |
|----------|---------------------|-------------------|----------------------|------------------------------------------|------------------------|------------------------------------|--------------------------------------|
| Exp.     |                     | 26.41             |                      |                                          |                        |                                    |                                      |
| Isomer 1 | -174                | 26.37             | 1.33; -1             | 0.6; 1                                   | 0.42; 1                | 0.8; -1                            | 111; 104.9                           |
| Isomer 2 | -54                 | 11.34             | 1.33; 1              | 0.6; -1                                  | 0.42; 1                | 0.8; -1                            | 111; 107.5                           |
| Isomer 3 | -51                 | 22.41             | 1.33; -1             | 0.6; 1                                   | 0.42; -1               | 0.8; 1                             | 105.9; 102.7                         |
| Isomer 4 | 70                  | 7.99              | 1.33; 1              | 0.6; -1                                  | 0.42; -1               | 0.8; 1                             | 105.9; 107.8                         |

$$\begin{aligned}
 3J(H, F) = & 40.61 \cos^2(\phi) - 4.22 \cos(\phi) + 5.88 & [4] \\
 & + \sum_i \lambda_i [-1.27 - 6.20 \cos^2(\xi_i(\phi) + 0.20 \lambda_i)] \\
 & - 3.72 \left[ \frac{(a_{\text{FCC}} + a_{\text{HCC}})}{2} - 110 \right] \cos^2(\phi)
 \end{aligned}$$

with  $\lambda_i$  = the electronegativity of the substituent,  $\xi_i$  = sign factor of the substituent,  $a_{\text{FCC}}$  and  $a_{\text{HCC}}$  = bond angles<sup>26,28</sup>.

## 6.2 Supplementary note: Stereochemistry of elongation substrates

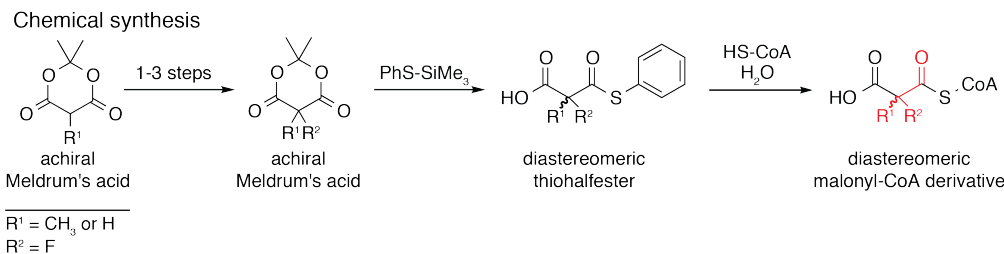

The malonyl-derivatives are synthesized via the achiral Meldrum's acid and the achiral, fluorinated Meldrum's acid derivatives. The two electrophilic carbonyl-carbon atoms in Meldrum's acid are equally likely for nucleophilic ring-opening with thiophenol, which gives a racemic mixture of thiohalfesters. We assume that the transesterification is insensitive to the stereocenter, and thus a diastereomeric mixture of CoA esters is obtained (diastereomers that are epimeric in the malonyl-moiety). Methylmalonyl-CoA was received from Sigma as a diastereomeric mixture.

## 6.3 Supplementary note: Stereochemistry of TKLs and macrolactones

Enzymatic synthesis of macrolactones was performed with diastereomeric elongation units and enantiomerically pure di-, penta- and hexaketide substrates.

As reported previously, FAS from goose accepts (*R*)- and (*S*)-MM-CoA for fatty acid synthesis<sup>29</sup>. Therefore, we assume that the MAT of mouse FAS can transfer both stereoisomers, which is in contrast to ATs of DEBS that are specific for the *S*-configured extender unit<sup>30</sup>. The Claisen-like condensation reaction catalyzed by the KS proceeds with inversion of the C2 configuration<sup>31</sup>.

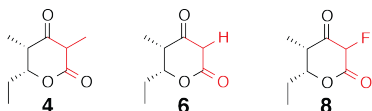

The unreduced TKLs **4** and **8** have been previously produced with DEBS module 6 by Chang and coworkers before (enzymatically and chemically)<sup>32</sup>. Compound **4** was mainly received in *2R*-configuration, whereas compound **8** was received almost exclusively in *2S*. The authors concluded that these configurations result from intrinsic stereoelectronic factors as a consequence of solvent dependent keto-enol tautomerism. We assume that compounds **11**, **15** and **16** are likely prone to keto-enol tautomerism; however, experimental evidence on the stereochemistry was not collected.

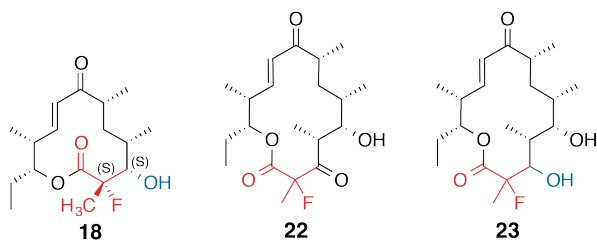

We found that **H1.1** produces 2-fluoro-10-deoxymethynolide (**18**) from the enantiomeric pentaketide and the diastereomeric F-MM-CoA in stereoselective manner, with compound **18** in 2*S*, 3*S*-configuration. In this reaction, we have not detected the 2*R*-epimer, nor any side product, which indicated that **H1.1** accepts just one F-MM moiety for elongation. We assume that stereoselectivity arises from the KS-mediated condensation: The *S*-configuration in position 2 of compound **18** can be explained by accommodating the F-MM moiety for substrate elongation with fluorine at the hydrogen position of the natively used methylmalonyl moiety. The stereochemistry in position 3 is as found in erythromycin. As described in the literature, the configuration at position 3 is most likely determined by the stereospecific KR-mediated reduction. Given the analogy to compound **18**, we expect compounds **22** and **23** to be obtained in 2*S*-configuration, but data to the stereochemistry of these compounds were not collected in this study.

## 7. Spectra

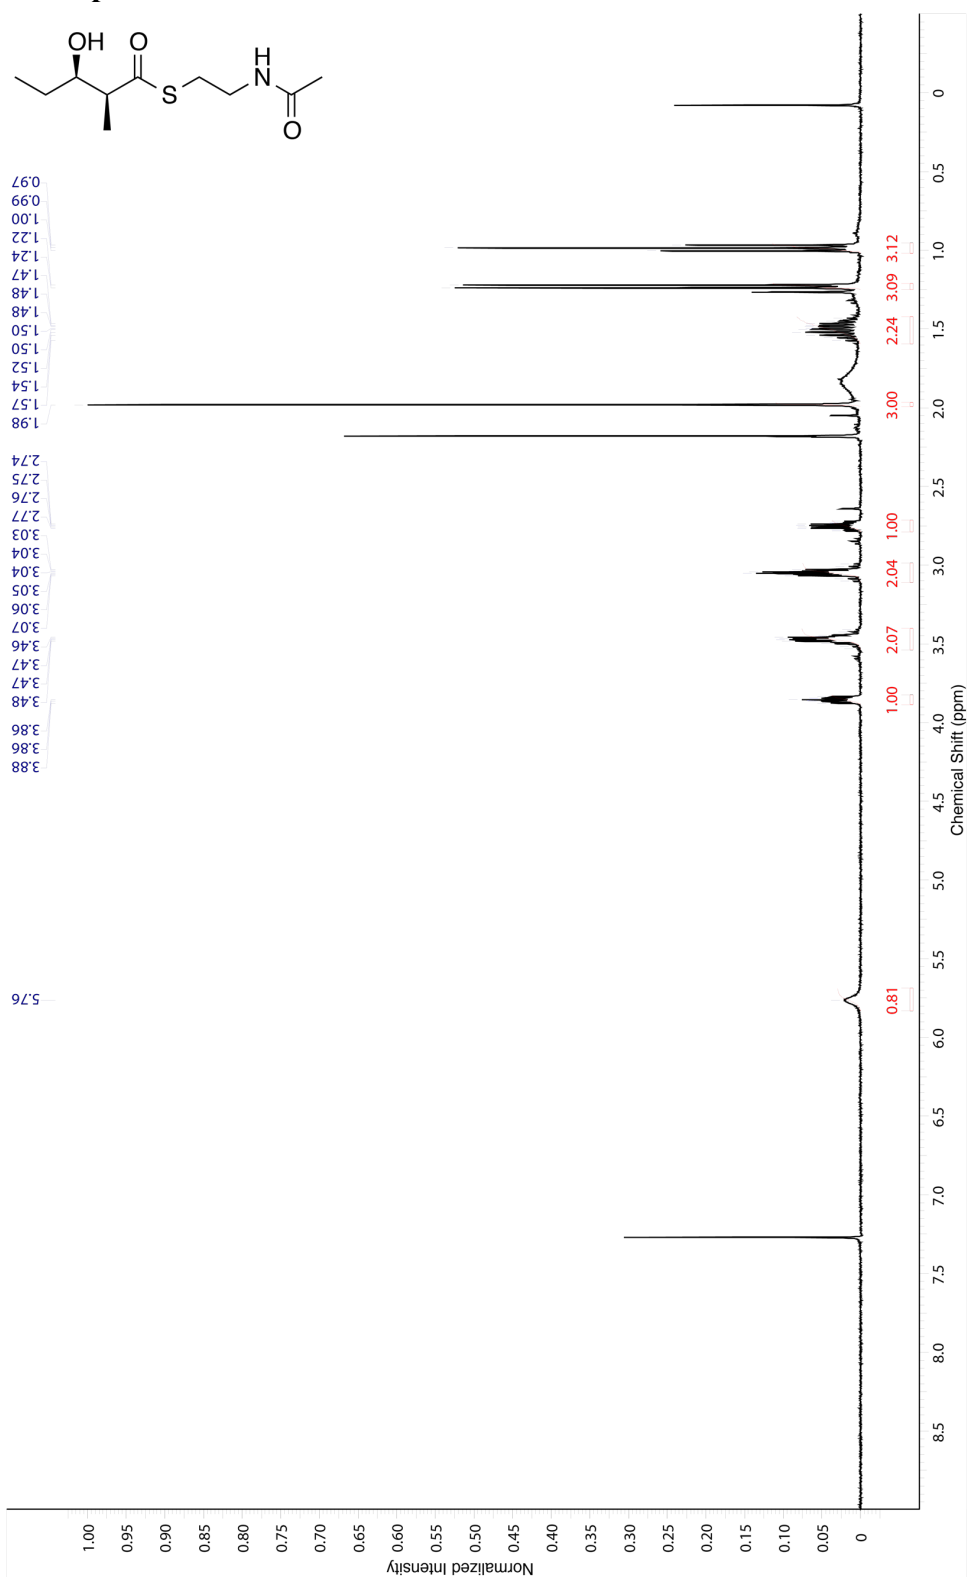

<sup>1</sup>H-NMR experiment of natural diketide SNAC (**2**) was performed on a 400 Mhz instrument (Bruker) with the solvent CDCl<sub>3</sub>.

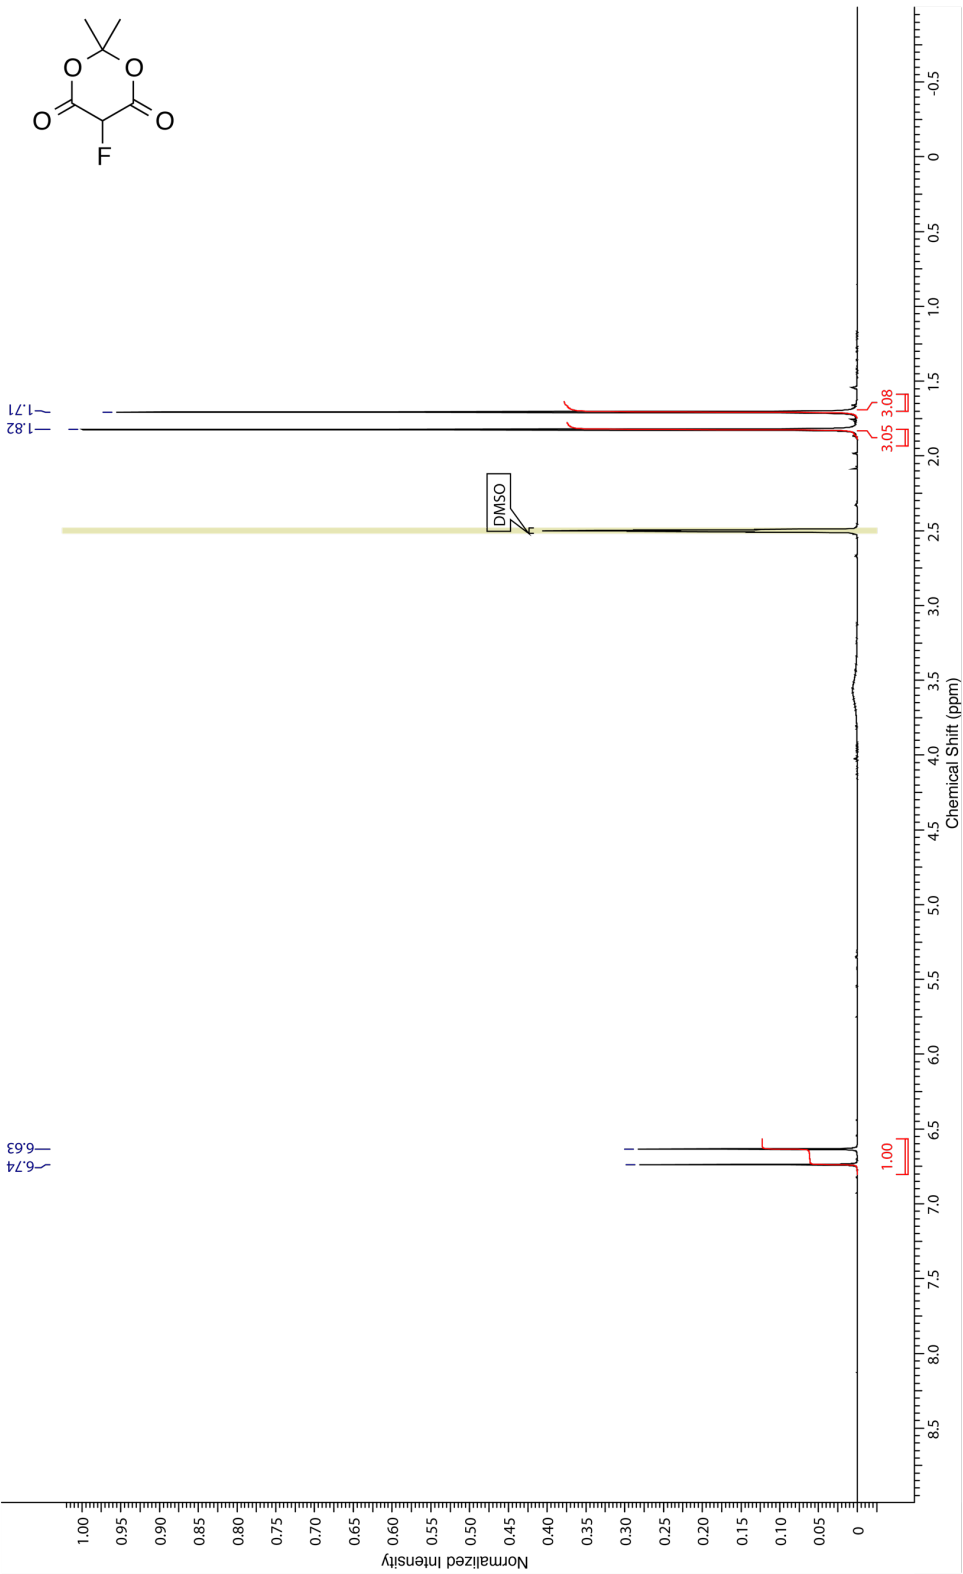

$^1\text{H-NMR}$  experiment of fluoro-Meldrum's acid (**S1**) was performed on a 400 Mhz instrument (Bruker) with the solvent  $\text{C}_2\text{D}_6\text{OS}$ .

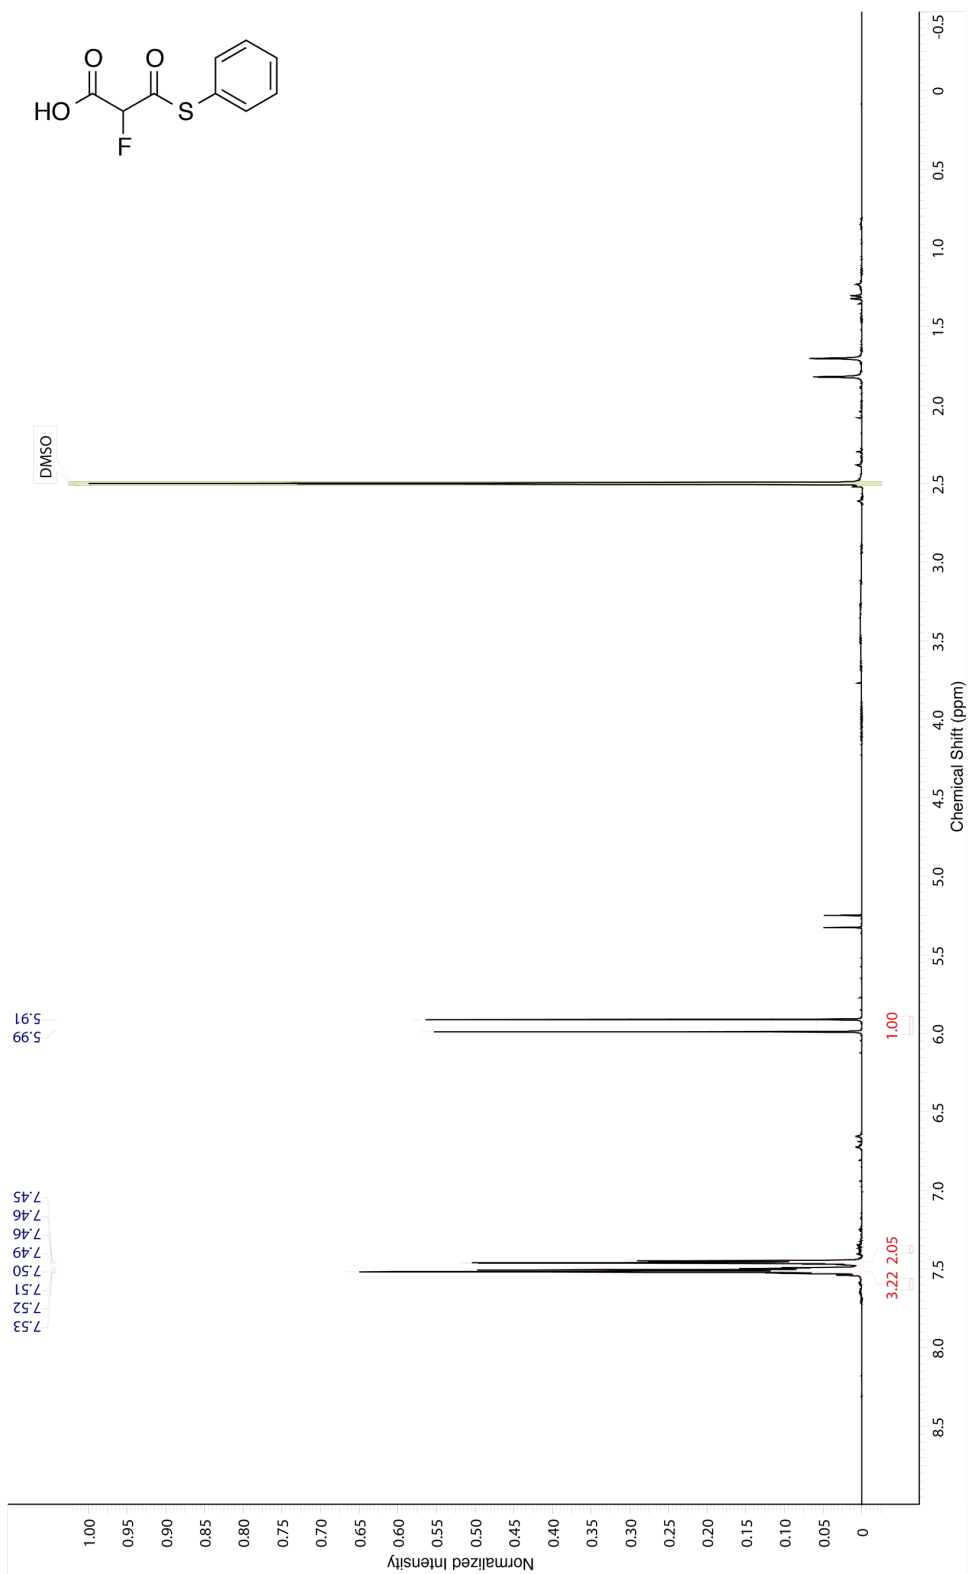

<sup>1</sup>H-NMR experiment of fluoromalonic acid thiophenyl halfester (**S2**) was performed on a 400 Mhz instrument (Bruker) with the solvent C<sub>2</sub>D<sub>6</sub>OS.

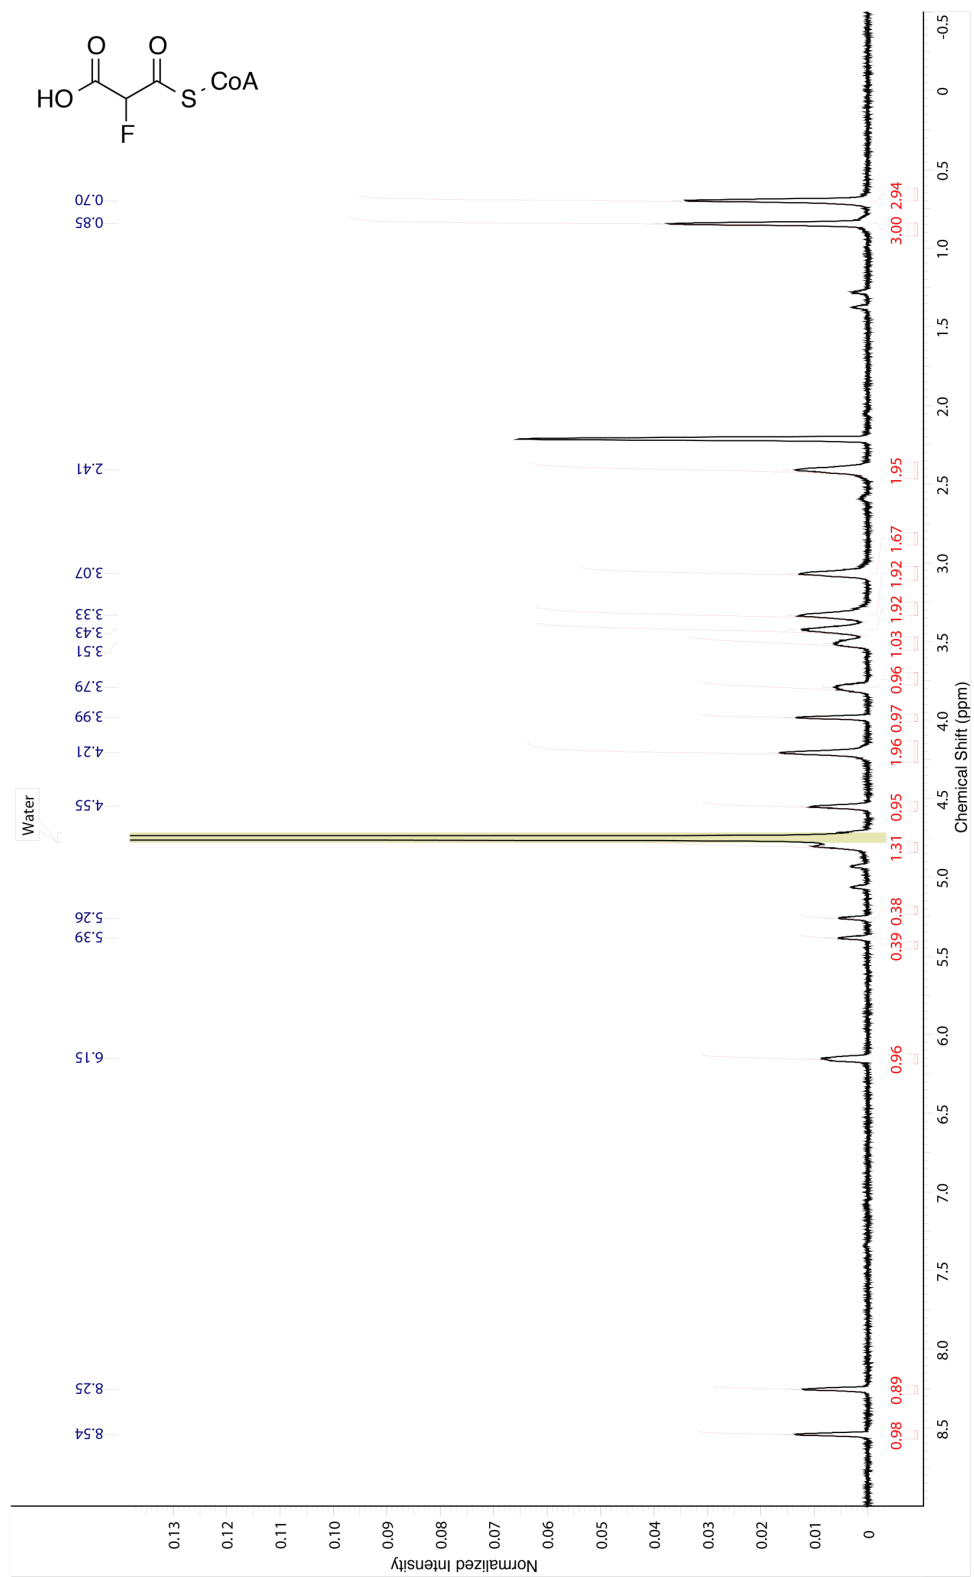

$^1\text{H-NMR}$  experiment of fluoromalonyl-CoA (**1**) was performed on a 400 Mhz instrument (Bruker) with the solvent  $\text{D}_2\text{O}$ .



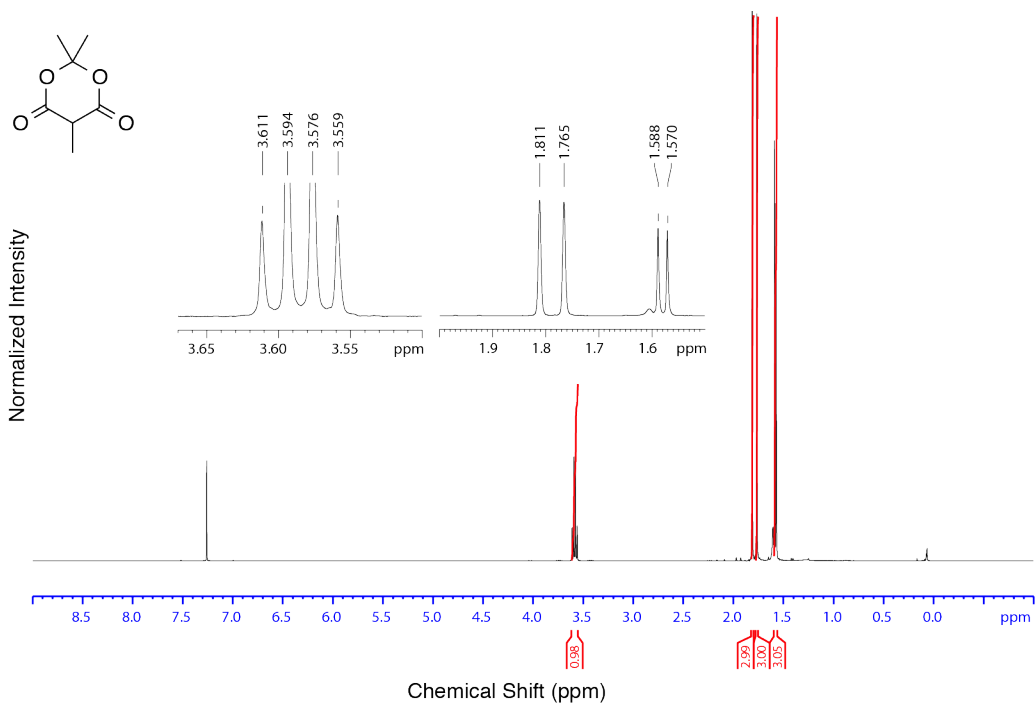

$^1\text{H-NMR}$  experiment of methyl-Meldrum's acid was performed on a 400 Mhz instrument (Bruker) with the solvent  $\text{CDCl}_3$ .

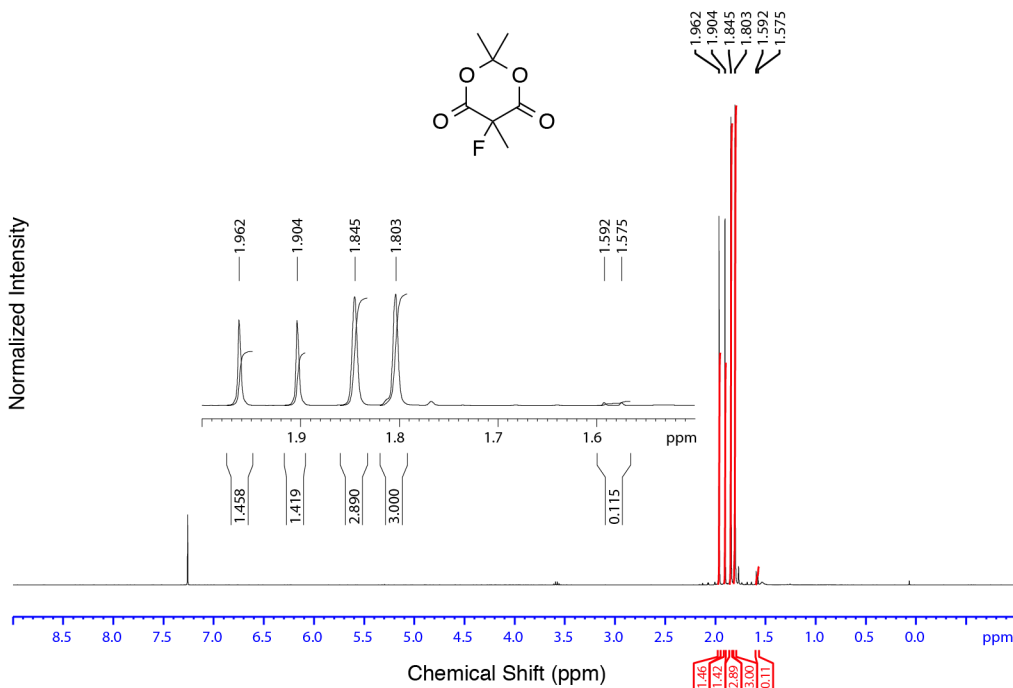

$^1\text{H-NMR}$  experiment of fluoromethyl Meldrum's acid (**S5**) was performed on a 400 Mhz instrument (Bruker) with the solvent  $\text{CDCl}_3$ .

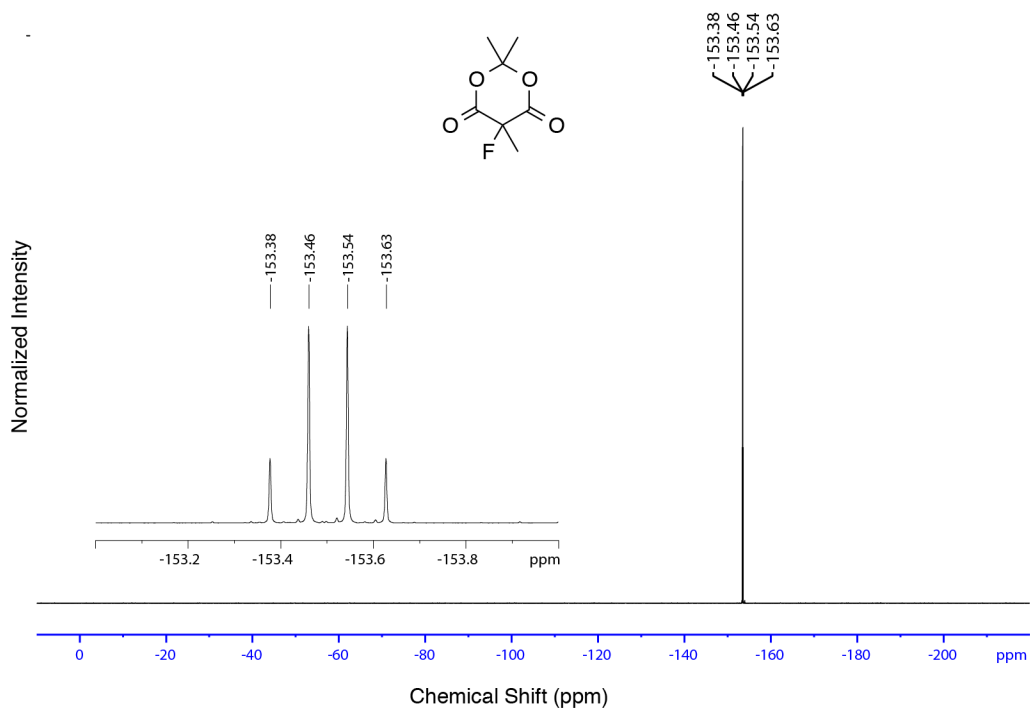

<sup>19</sup>F-NMR experiment of fluoromethyl Meldrum's acid (**S5**) was performed on a 300 Mhz instrument (Bruker) with the solvent CDCl<sub>3</sub>.

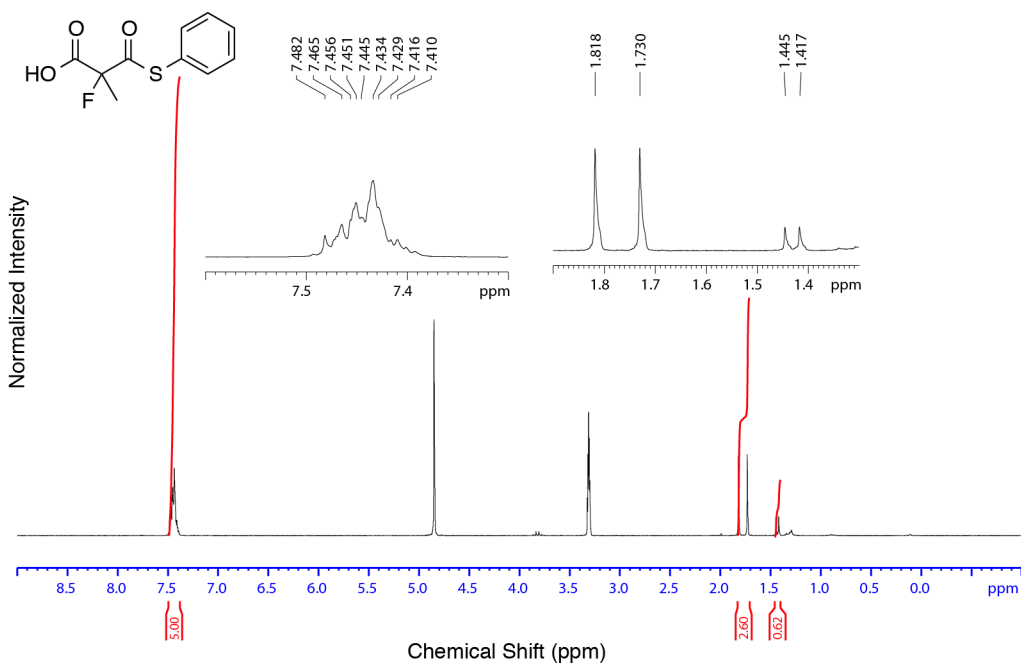

<sup>1</sup>H-NMR experiment of fluoromethyl malonic acid thiophenyl halfester (**S6**) was performed on a 250 Mhz instrument (Bruker) with the solvent CD<sub>3</sub>OD.

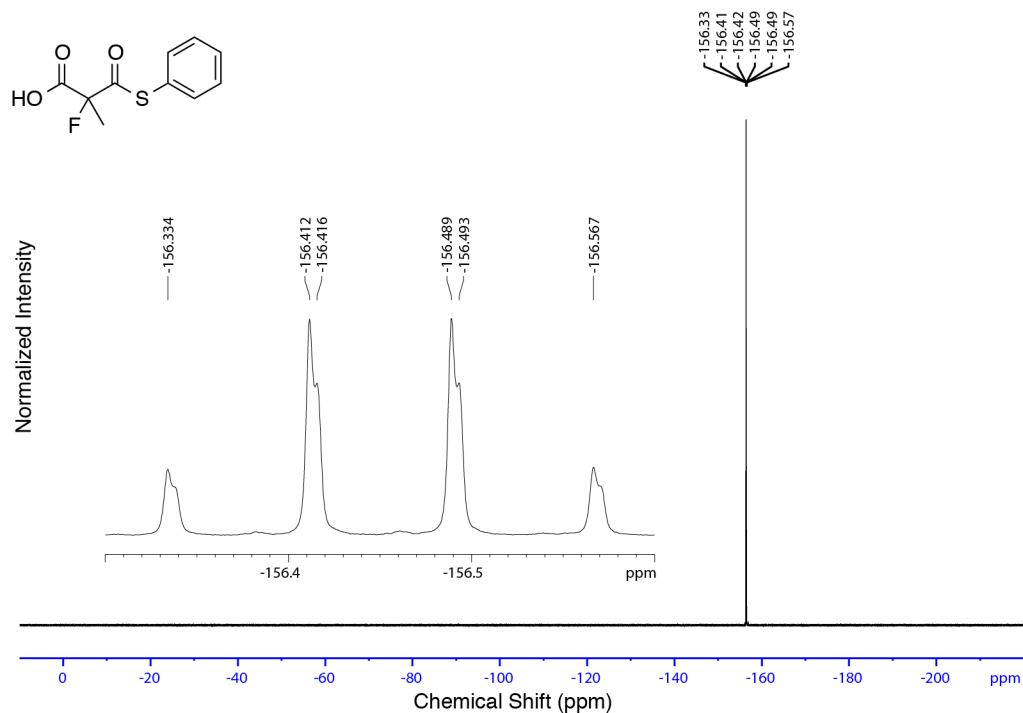

$^{19}\text{F}$ -NMR experiment of fluoromethyl malonic acid thiophenyl halfester (**S6**) was performed on a 300 Mhz instrument (Bruker) with the solvent  $\text{CDCl}_3$ .

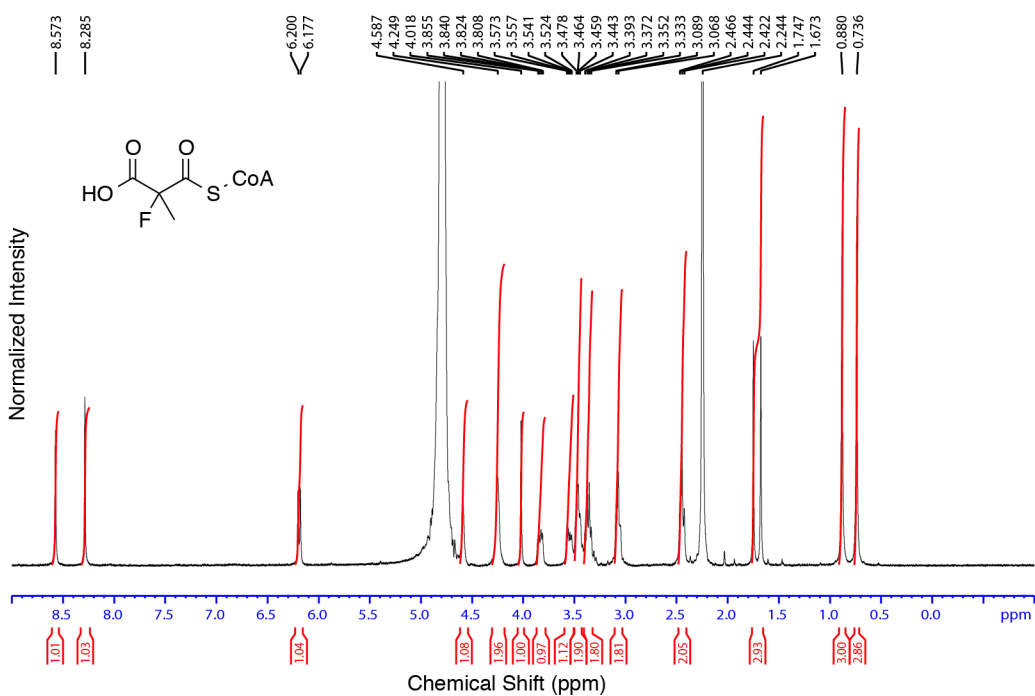

$^1\text{H}$ -NMR experiment of fluoromethylmalonyl-CoA (**17**) was performed on a 300 Mhz instrument (Bruker) with the solvent  $\text{D}_2\text{O}$ .

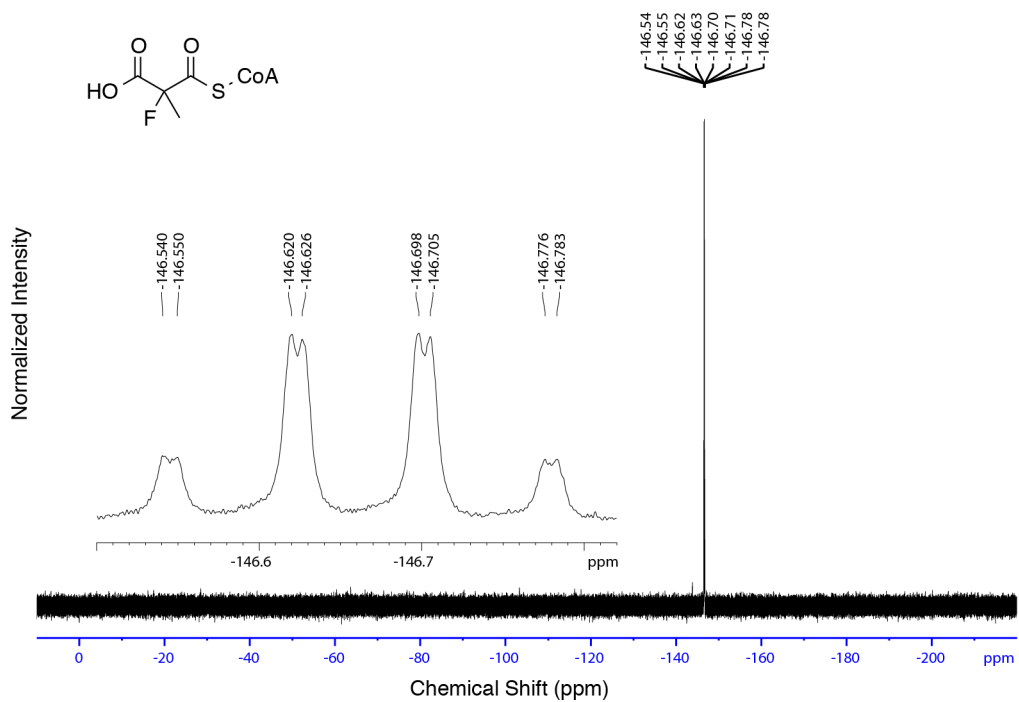

$^{19}\text{F}$ -NMR experiment of fluoromethylmalonyl-CoA (**17**) was performed on a 300 Mhz instrument (Bruker) with the solvent  $\text{D}_2\text{O}$ .

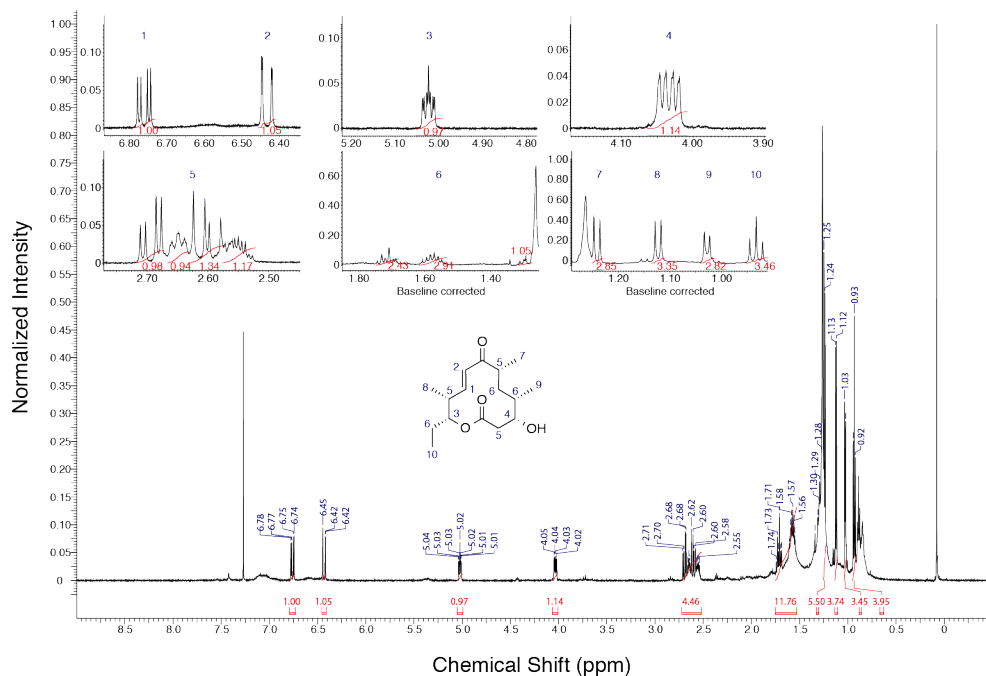

<sup>1</sup>H-NMR experiment of compound **12** was performed on a 600 Mhz instrument (Bruker) with the solvent CDCl<sub>3</sub>.

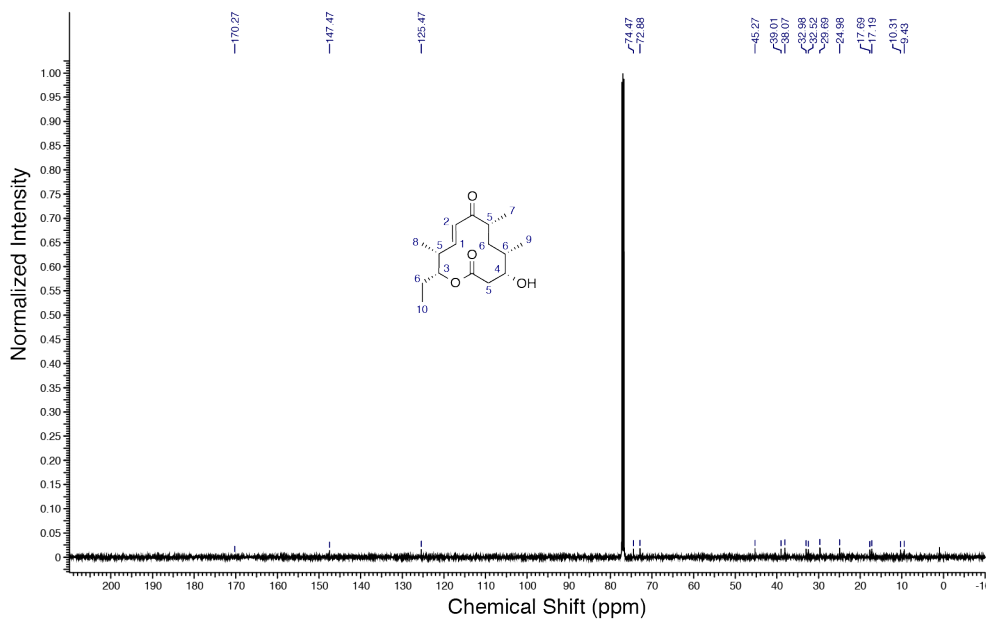

<sup>13</sup>C-NMR experiment of compound **12** was performed on a 500 Mhz instrument (Bruker) with the solvent CDCl<sub>3</sub>.

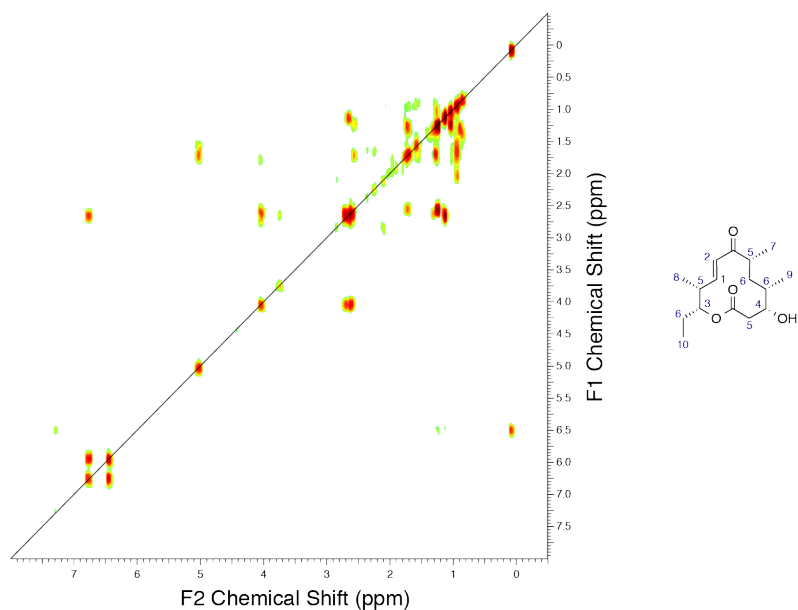

NOESY experiment of compound **12** was performed on a 500 Mhz instrument (Bruker) with the solvent  $\text{CDCl}_3$ .

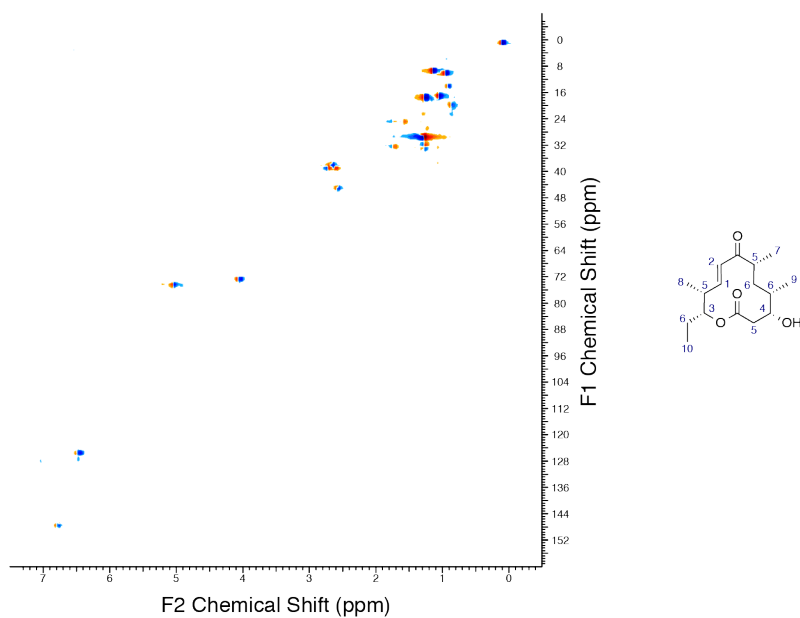

HSQC experiment of compound **12** was performed on a 500 Mhz instrument (Bruker) with the solvent  $\text{CDCl}_3$ .

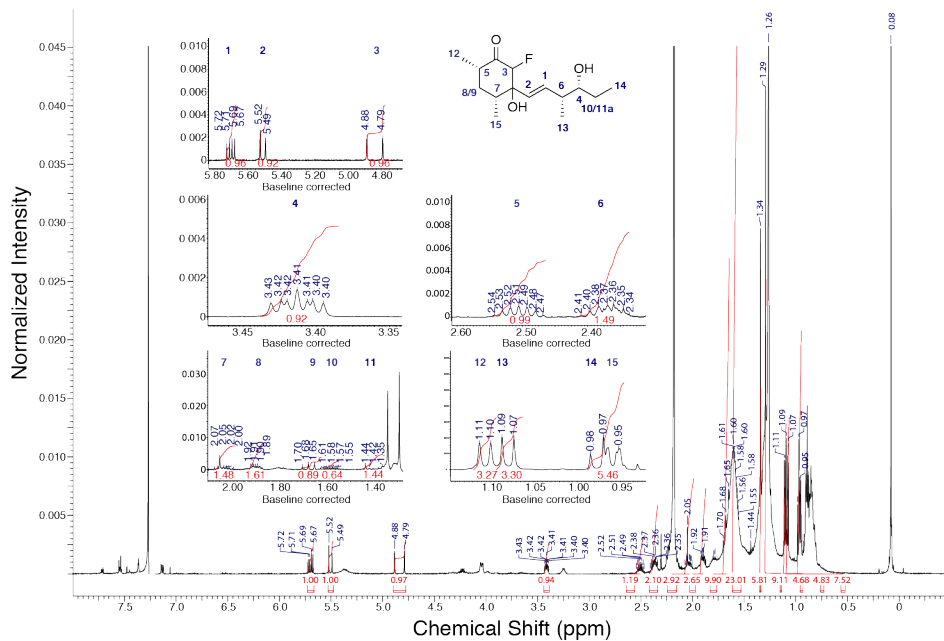

$^1\text{H-NMR}$  experiment of compound **16** was performed on a 500 Mhz instrument (Bruker) with the solvent  $\text{CDCl}_3$ .

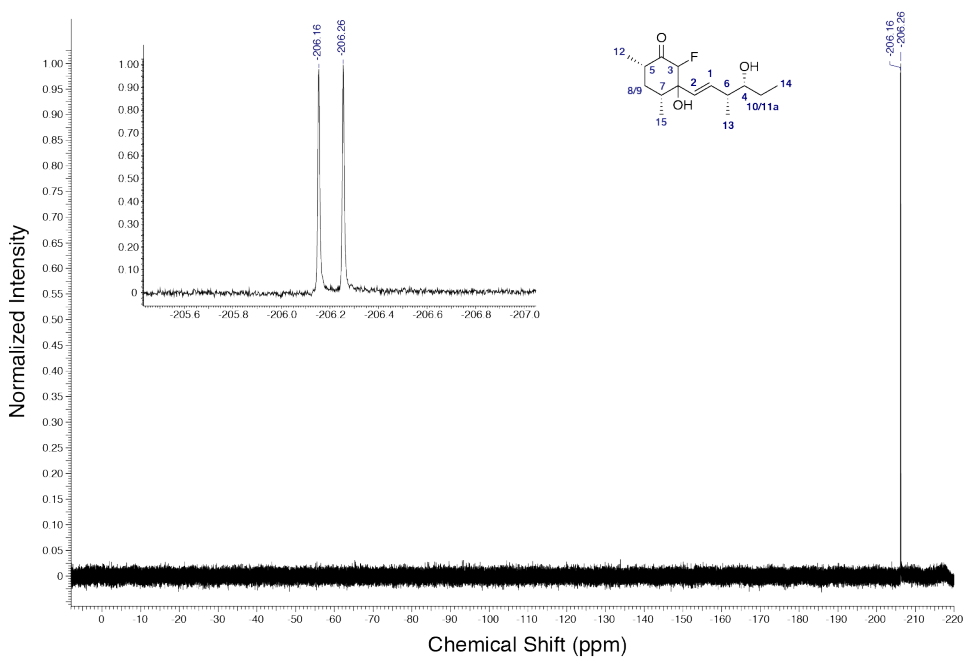

$^{19}\text{F-NMR}$  experiment of compound **16** was performed on a 500 Mhz instrument (Bruker) with the solvent  $\text{CDCl}_3$ .

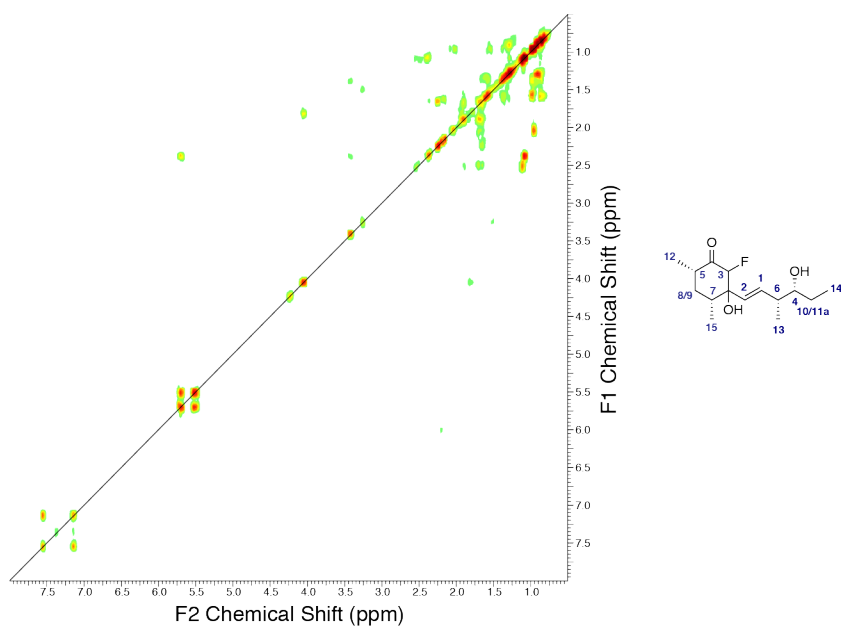

COESY experiment of compound **16** was performed on a 500 Mhz instrument (Bruker) with the solvent CDCl<sub>3</sub>.

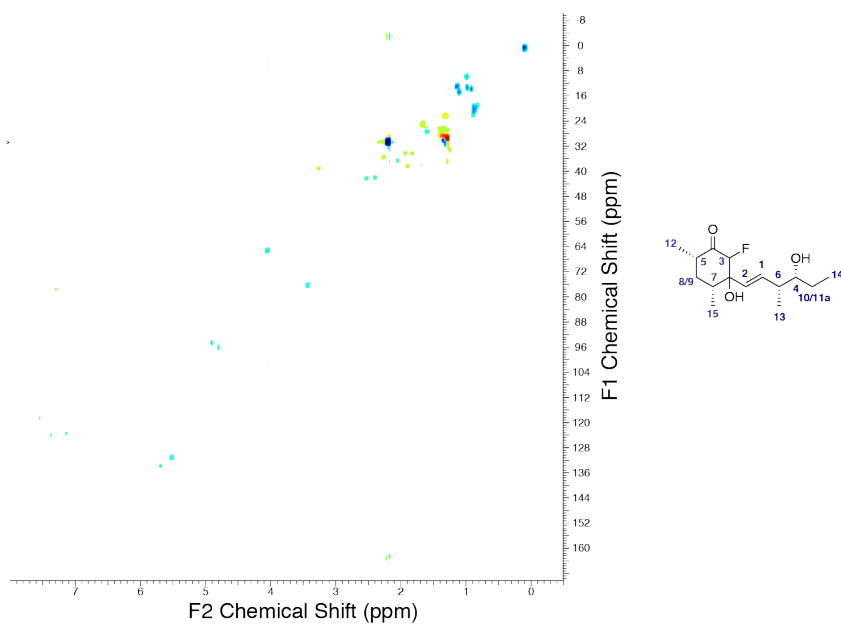

HSQC experiment of compound **16** was performed on a 500 Mhz instrument (Bruker) with the solvent CDCl<sub>3</sub>.



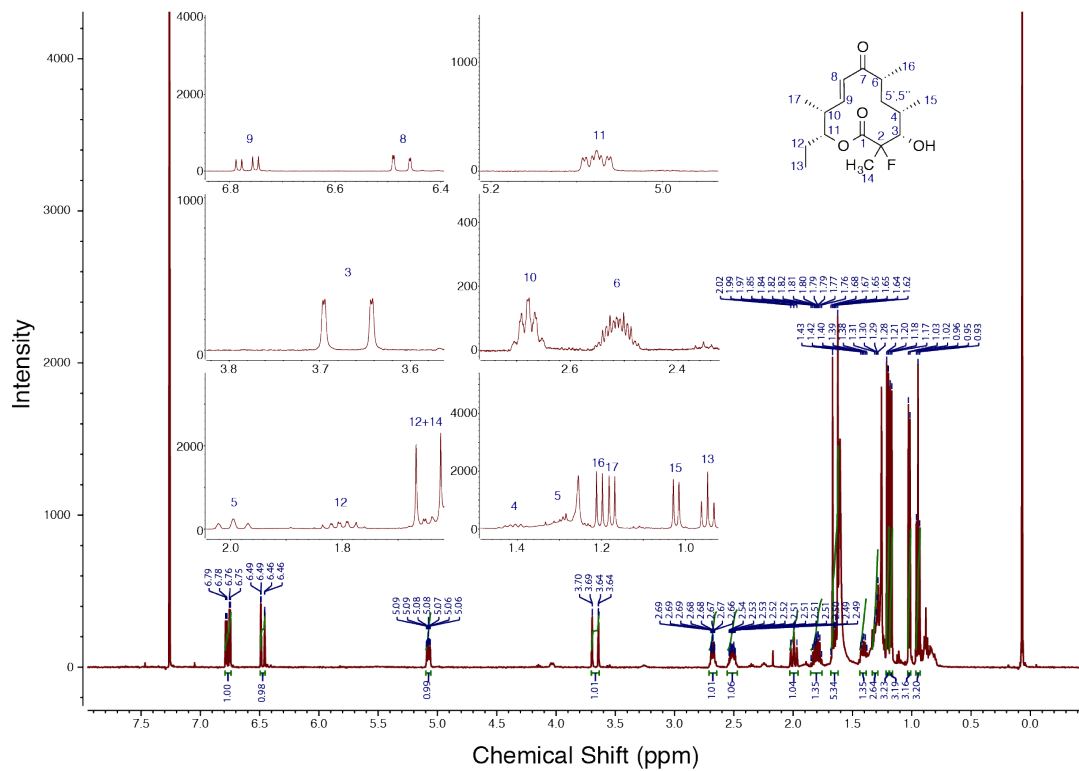

<sup>1</sup>H-NMR experiment of compound **18** was performed on a 500 Mhz instrument (Bruker) with the solvent CDCl<sub>3</sub>.

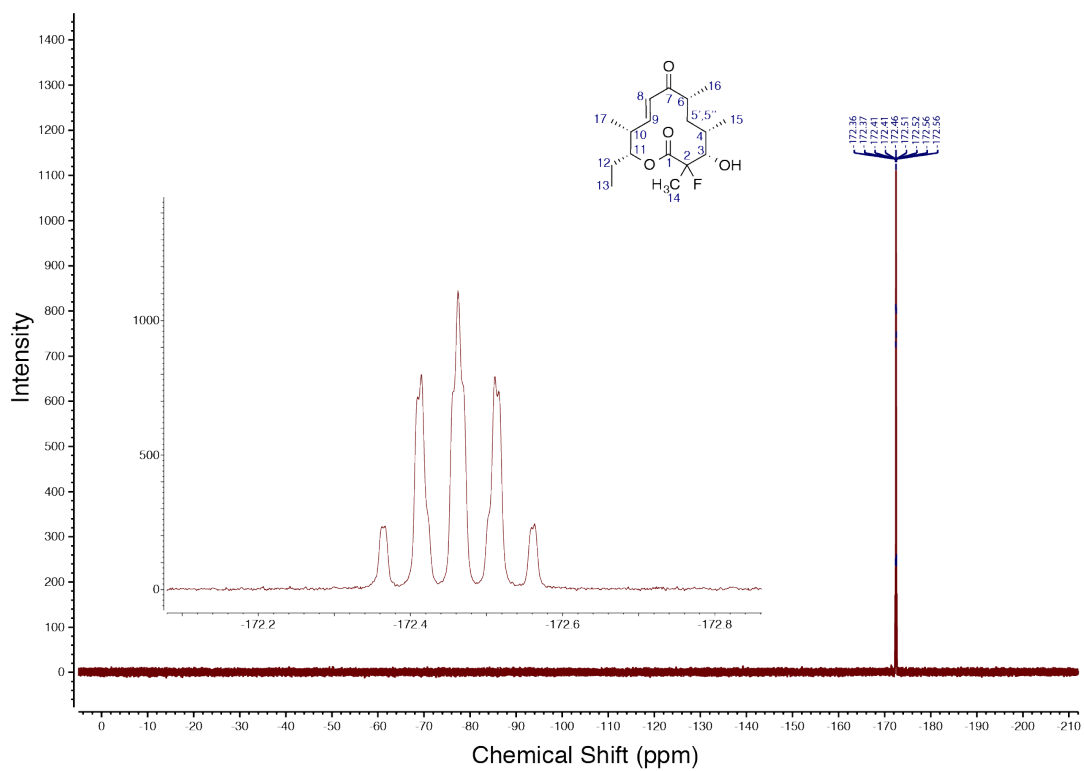

<sup>19</sup>F-NMR experiment of compound **18** was performed on a 500 Mhz instrument (Bruker) with the solvent CDCl<sub>3</sub>.

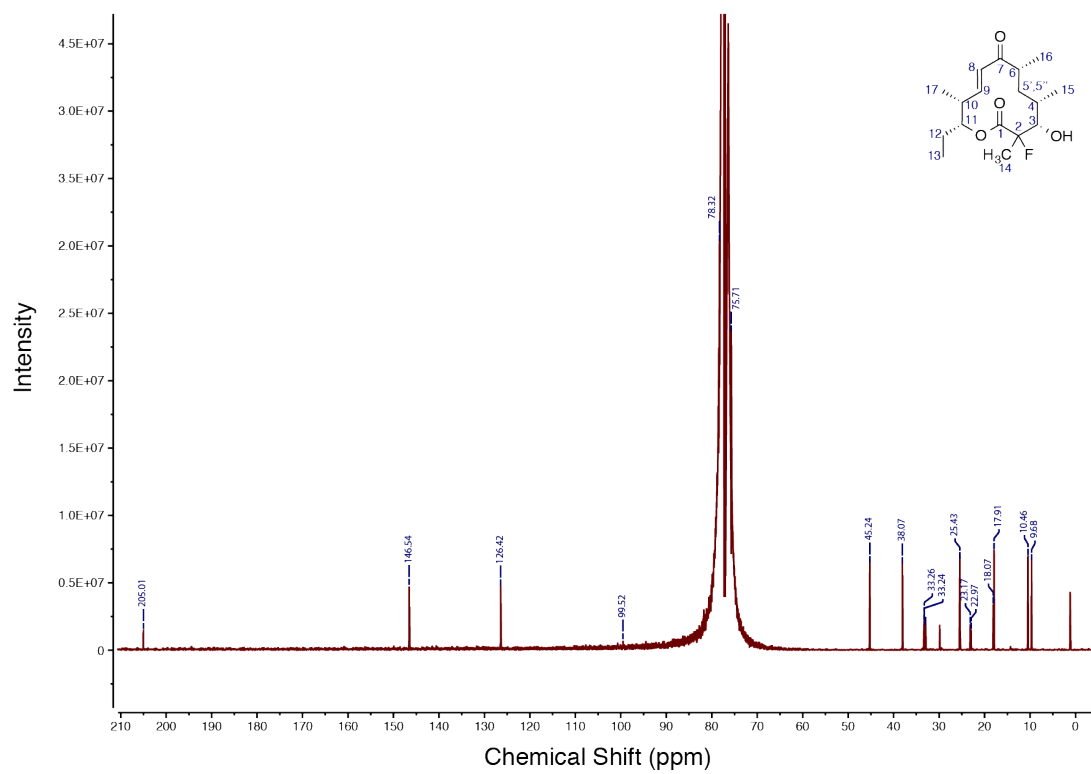

$^{13}\text{C}$ -NMR experiment of compound **18** was performed on a 500 Mhz instrument (Bruker) with the solvent  $\text{CDCl}_3$ .

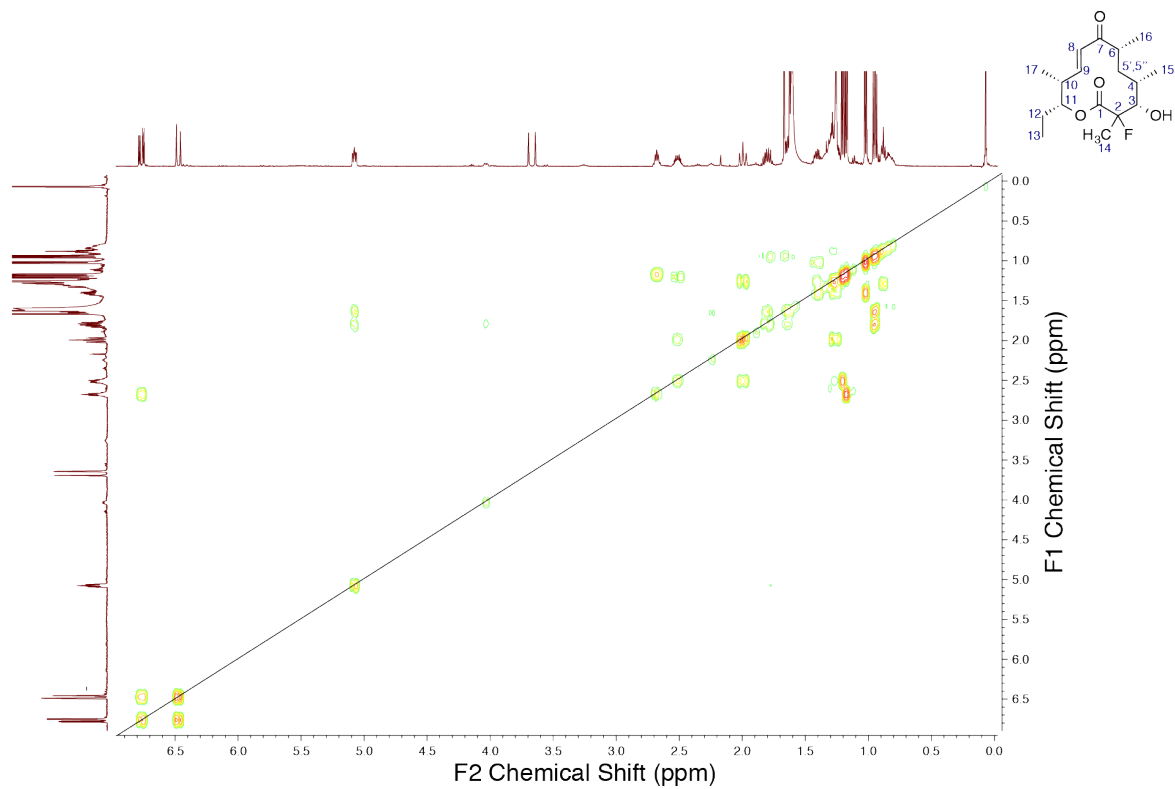

COSY experiment of compound **18** was performed on a 500 Mhz instrument (Bruker) with the solvent CDCl<sub>3</sub>.

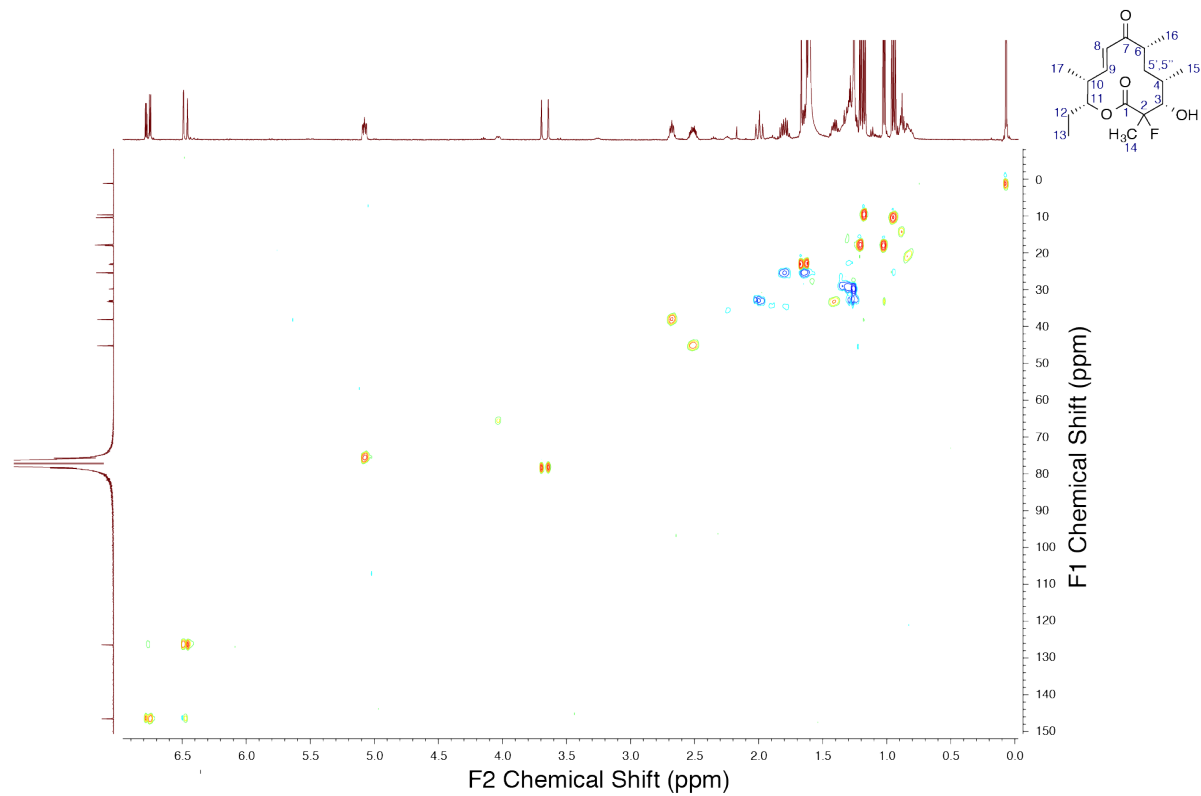

HSQC experiment of compound **18** was performed on a 500 Mhz instrument (Bruker) with the solvent CDCl<sub>3</sub>.

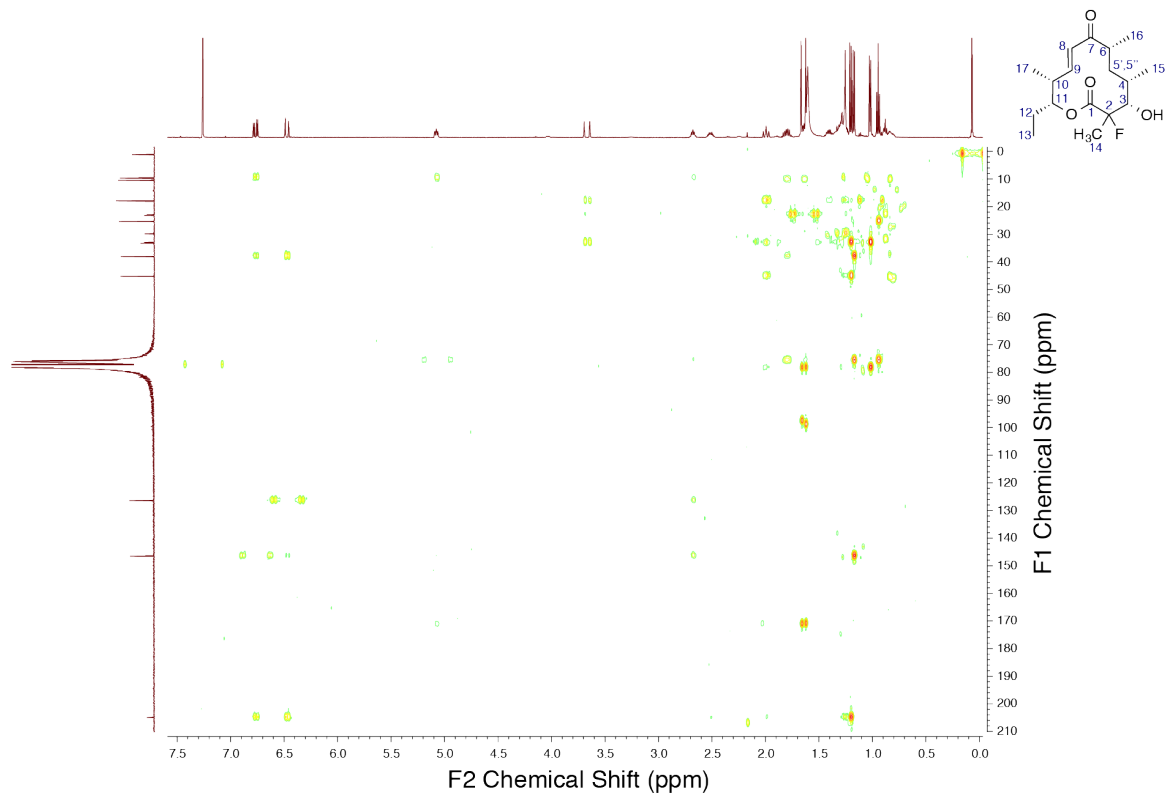

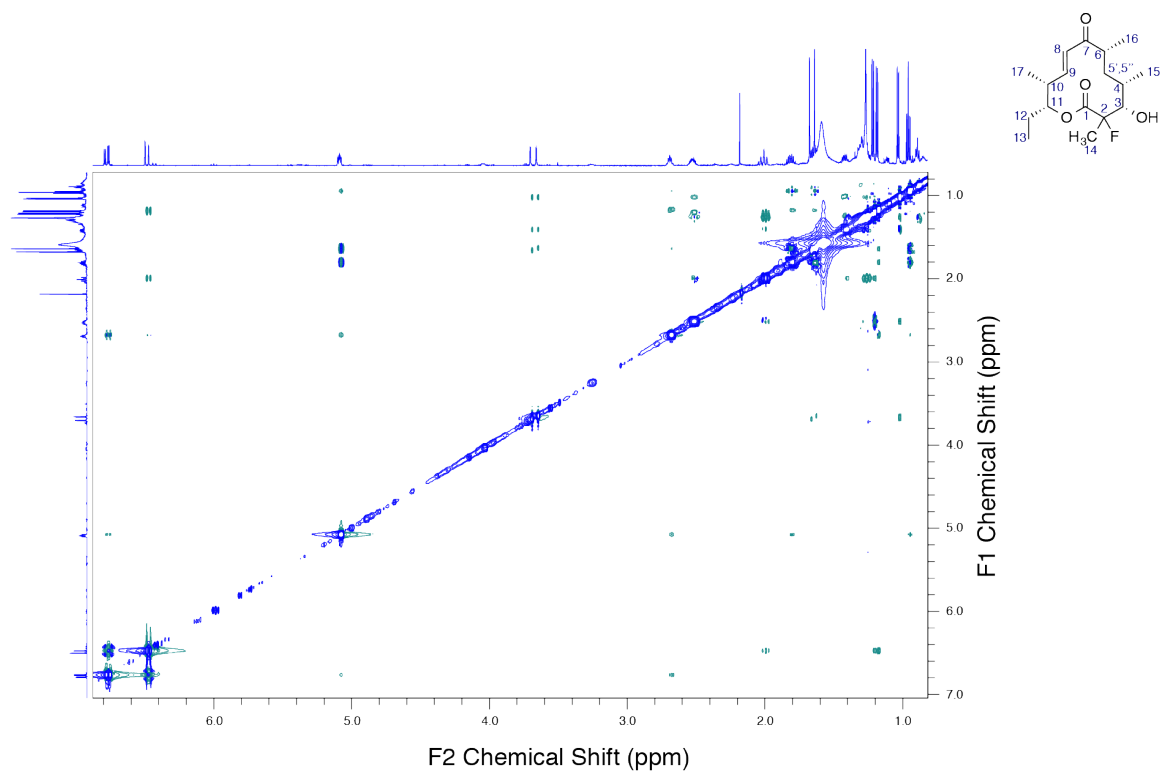

NOESY experiment of compound **18** was performed on a 600 Mhz instrument (Bruker) with the solvent CDCl<sub>3</sub>.

## 8. References

1. Rittner, A., Paithankar, K. S., Huu, K. V. & Grninger, M. Characterization of the Polyspecific Transferase of Murine Type I Fatty Acid Synthase (FAS) and Implications for Polyketide Synthase (PKS) Engineering. *ACS Chemical Biology* **13**, 723–732 (2018).
2. Kim, C.-Y. *et al.* Reconstituting Modular Activity from Separated Domains of 6-Deoxyerythronolide B Synthase †. *Biochemistry* **43**, 13892–13898 (2004).
3. Koch, A. A. *et al.* Probing Selectivity and Creating Structural Diversity Through Hybrid Polyketide Synthases. *Angew. Chem. Int. Ed.* **132**, 13677–13682 (2020).
4. Rittner, A., Paithankar, K. S., Drexler, D. J., Himmler, A. & Grninger, M. Probing the modularity of megasynthases by rational engineering of a fatty acid synthase Type I: Probing the Modularity of Megasynthases by Rational Engineering of a Fatty Acid Synthase Type I. *Protein Science* **28**, 414–428 (2019).
5. Dutler, H., Kull, A. & Mislin, R. Fatty Acid Synthetase from Pig Liver. 2. Characterization of the Enzyme Complex with Oxidoreductase Activity for Alicyclic Ketones as a Fatty Acid Synthetase. *European Journal of Biochemistry* **22**, 213–217 (1971).
6. Yuzawa, S. *et al.* Comprehensive *in Vitro* Analysis of Acyltransferase Domain Exchanges in Modular Polyketide Synthases and Its Application for Short-Chain Ketone Production. *ACS Synthetic Biology* **6**, 139–147 (2017).
7. Hansen, D. A., Koch, A. A. & Sherman, D. H. Substrate Controlled Divergence in Polyketide Synthase Catalysis. *J. Am. Chem. Soc.* **137**, 3735–3738 (2015).
8. Lowell, A. N. *et al.* Chemoenzymatic Total Synthesis and Structural Diversification of Tylactone-Based Macrolide Antibiotics through Late-Stage Polyketide Assembly, Tailoring, and C—H Functionalization. *J. Am. Chem. Soc.* **139**, 7913–7920 (2017).
9. DeMars, M. D. *et al.* Biochemical and Structural Characterization of MycCI, a Versatile P450 Biocatalyst from the Mycinamicin Biosynthetic Pathway. *ACS Chem. Biol.* **11**, 2642–2654 (2016).
10. Jung, W. S. *et al.* Enhanced Heterologous Production of Desosaminyl Macrolides and Their Hydroxylated Derivatives by Overexpression of the pikD Regulatory Gene in *Streptomyces venezuelae*. *Applied and Environmental Microbiology* **74**, 1972–1979 (2008).
11. Saadi, J. & Wennemers, H. Enantioselective aldol reactions with masked fluoroacetates. *Nature Chem* **8**, 276–280 (2016).
12. Dunn, B. J., Watts, K. R., Robbins, T., Cane, D. E. & Khosla, C. Comparative Analysis of the Substrate Specificity of *trans* - versus *cis*- Acyltransferases of Assembly Line Polyketide Synthases. *Biochemistry* **53**, 3796–3806 (2014).
13. Nagi, M. N., Cook, L., Suneja, S. K., Osei, P. & Cinti, D. L. Spectrophotometric assay for the condensing enzyme activity of the microsomal fatty acid chain elongation system. *Analytical Biochemistry* **179**, 251–261 (1989).
14. Sharma, K. K. & Boddy, C. N. The thioesterase domain from the pimaricin and erythromycin biosynthetic pathways can catalyze hydrolysis of simple thioester substrates. *Bioorganic & Medicinal Chemistry Letters* **17**, 3034–3037 (2007).
15. Peter, D. M. *et al.* Screening and Engineering the Synthetic Potential of Carboxylating Reductases from Central Metabolism and Polyketide Biosynthesis. *Angew. Chem. Int. Ed.* **54**, 13457–13461 (2015).
16. Bravo-Rodriguez, K. *et al.* Predicted Incorporation of Non-native Substrates by a Polyketide Synthase Yields Bioactive Natural Product Derivatives. *ChemBioChem* **15**, 1991–1997 (2014).



17. Pappenberger, G. *et al.* Structure of the Human Fatty Acid Synthase KS–MAT Didomain as a Framework for Inhibitor Design. *J. Mol. Biol.* **397**, 508–519 (2010).
18. Miyanaga, A., Iwasawa, S., Shinohara, Y., Kudo, F. & Eguchi, T. Structure-based analysis of the molecular interactions between acyltransferase and acyl carrier protein in vicenistatin biosynthesis. *Proc Natl Acad Sci USA* **113**, 1802–1807 (2016).
19. Guex, N., Peitsch, M. C. & Schwede, T. Automated comparative protein structure modeling with SWISS-MODEL and Swiss-PdbViewer: A historical perspective. *ELECTROPHORESIS* **30**, S162–S173 (2009).
20. Bertoni, M., Kiefer, F., Biasini, M., Bordoli, L. & Schwede, T. Modeling protein quaternary structure of homo- and hetero-oligomers beyond binary interactions by homology. *Sci Rep* **7**, 1–15 (2017).
21. Studer, G. *et al.* QMEANDisCo—distance constraints applied on model quality estimation. *Bioinformatics* **36**, 1765–1771 (2020).
22. Waterhouse, A. *et al.* SWISS-MODEL: homology modelling of protein structures and complexes. *Nucleic Acids Research* **46**, W296–W303 (2018).
23. Bienert, S. *et al.* The SWISS-MODEL Repository—new features and functionality. *Nucleic Acids Res* **45**, D313–D319 (2017).
24. Blaquiere, N., Shore, D. G., Rousseaux, S. & Fagnou, K. Decarboxylative ketone aldol reactions: development and mechanistic evaluation under metal-free conditions. *J Org Chem* **74**, 6190–8 (2009).
25. Awakawa, T. *et al.* Salinipyrone and Pacificanone Are Biosynthetic By-products of the Rosamicin Polyketide Synthase. *ChemBioChem* **16**, 1443–1447 (2015).
26. Altona, C. Vicinal Coupling Constants and Conformation of Biomolecules. in *Encyclopedia of Magnetic Resonance* (ed. Harris, R. K.) (John Wiley & Sons, Ltd, 2007). doi:10.1002/9780470034590.emrstm0587.
27. Haasnoot, C. A. G., de Leeuw, F. A. A. M., de Leeuw, H. P. M. & Altona, C. The relationship between proton-proton NMR coupling constants and substituent electronegativities. II—conformational analysis of the sugar ring in nucleosides and nucleotides in solution using a generalized Karplus equation. *Org. Magn. Reson.* **15**, 43–52 (1981).
28. Thibaudeau, C., Plavec, J. & Chattopadhyaya, J. A New Generalized Karplus-Type Equation Relating Vicinal Proton-Fluorine Coupling Constants to H–C–C–F Torsion Angles. *J. Org. Chem.* **63**, 4967–4984 (1998).
29. Kim, Y. S. & Kolattukudy, P. E. Stereospecificity of malonyl-CoA decarboxylase, acetyl-CoA carboxylase, and fatty acid synthetase from the uropygial gland of goose. *Journal of Biological Chemistry* **255**, 686–689 (1980).
30. Marsden, A. F. A. *et al.* Stereospecific Acyl Transfers on the Erythromycin-Producing Polyketide Synthase. *Science* **263**, 378–380 (1994).
31. Smith, S. & Tsai, S.-C. The type I fatty acid and polyketide synthases: a tale of two megasynthases. *Natural Product Reports* **24**, 1041–1072 (2007).
32. Walker, M. C. *et al.* Expanding the Fluorine Chemistry of Living Systems Using Engineered Polyketide Synthase Pathways. *Science* **341**, 1089–1094 (2013).
